# Supplementary material
Source: PubMed Central journal article supplement (PMC5234682)
Supplement: NIHMS839952-supplement-1.pdf [file NIHMS839952-supplement-1.pdf]

## Supplementary Information

### Truncated auto-inducing peptides as antagonists of *Staphylococcus lugdunensis* quorum sensing

Christopher P. Gordon,<sup>a\*</sup> Shondra D. Olson,<sup>b</sup> Jessica L. Lister,<sup>b</sup> Jeffrey S. Kavanaugh,<sup>b</sup> and Alexander R. Horswill<sup>b\*</sup>

Competitive quorum sensing antagonism (QS) offers a novel strategy for attenuating current multi-drug resistant staphylococcal infections. To this end, a series of 10 truncated analogues based on the parent auto-inducing peptides (AIPs) of *Staphylococcus lugdunensis* (group I & II) and *Staphylococcus epidermidis* (groups I – III) were sequentially assessed against a newly developed *Staphylococcus lugdunensis* group I QS reporter strain. The truncated analogues based upon *Staphylococcus lugdunensis* AIP-1 (**1**) and AIP-2 (**2**) displayed respective  $IC_{50}$  values of  $0.2 \pm 0.01 \mu\text{M}$  and  $0.3 \pm 0.01 \mu\text{M}$  whilst the truncated analogue of the *S. Staphylococcus. epidermidis* AIP-1 (**3**) elicited an  $IC_{50}$  value of  $2.7 \pm 0.1 \mu\text{M}$ . These findings demonstrate the potential of cognate and ‘cross-talk’ competitive quorum sensing inhibition using truncated AIPs as a means of attenuating staphylococcal infections in species beyond *Staphylococcus aureus*.

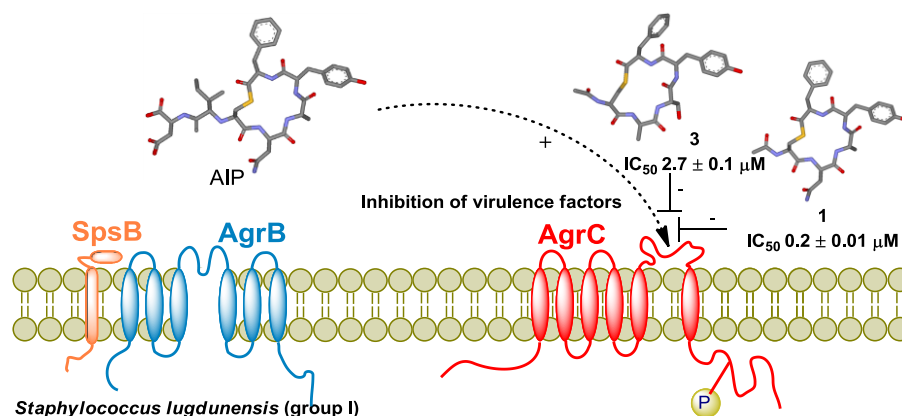

|                                                                                         |      |
|-----------------------------------------------------------------------------------------|------|
| Dose response, OD600, and RFU curves                                                    | S2   |
| General biology methods                                                                 | S4   |
| General chemistry methods                                                               | S5   |
| General procedure for resin loading                                                     | S6   |
| General procedure for linear peptide synthesis (compound <b>6</b> )                     | S7   |
| General procedure for peptide cyclisation (compound <b>7</b> )                          | S9   |
| General procedure for peptide de-protection (compound <b>1</b> )                        | S11  |
| Synthesis of truncated <i>S lug</i> AIP-II analogues (compounds <b>11</b> & <b>2</b> )  | S17  |
| Synthesis of Truncated <i>S epi</i> AIP-I Analogues (compounds <b>12</b> & <b>3</b> )   | S28  |
| Synthesis of Truncated <i>S epi</i> AIP-II Analogues (compounds <b>13</b> & <b>4</b> )  | S39  |
| Synthesis of Truncated <i>S epi</i> AIP-III Analogues (compounds <b>14</b> & <b>5</b> ) | S51  |
| Peptide Cyclisation Trials – PS-EDCI with <i>S epi</i> AIP-I (compound <b>13</b> )      | S64  |
| Peptide Cyclisation Trials – PS-DCC with <i>S epi</i> AIP-I (compound <b>13</b> )       | S82  |
| Peptide Cyclisation Trials – PS-CD with <i>S epi</i> AIP-I (compound <b>13</b> )        | S98  |
| De-Protected Cyclisation with HOAt, PS-CD and <i>S epi</i> AIP-I (compound <b>3</b> )   | S116 |
| References                                                                              | S120 |

## Biology, Quorum-sensing inhibition assay

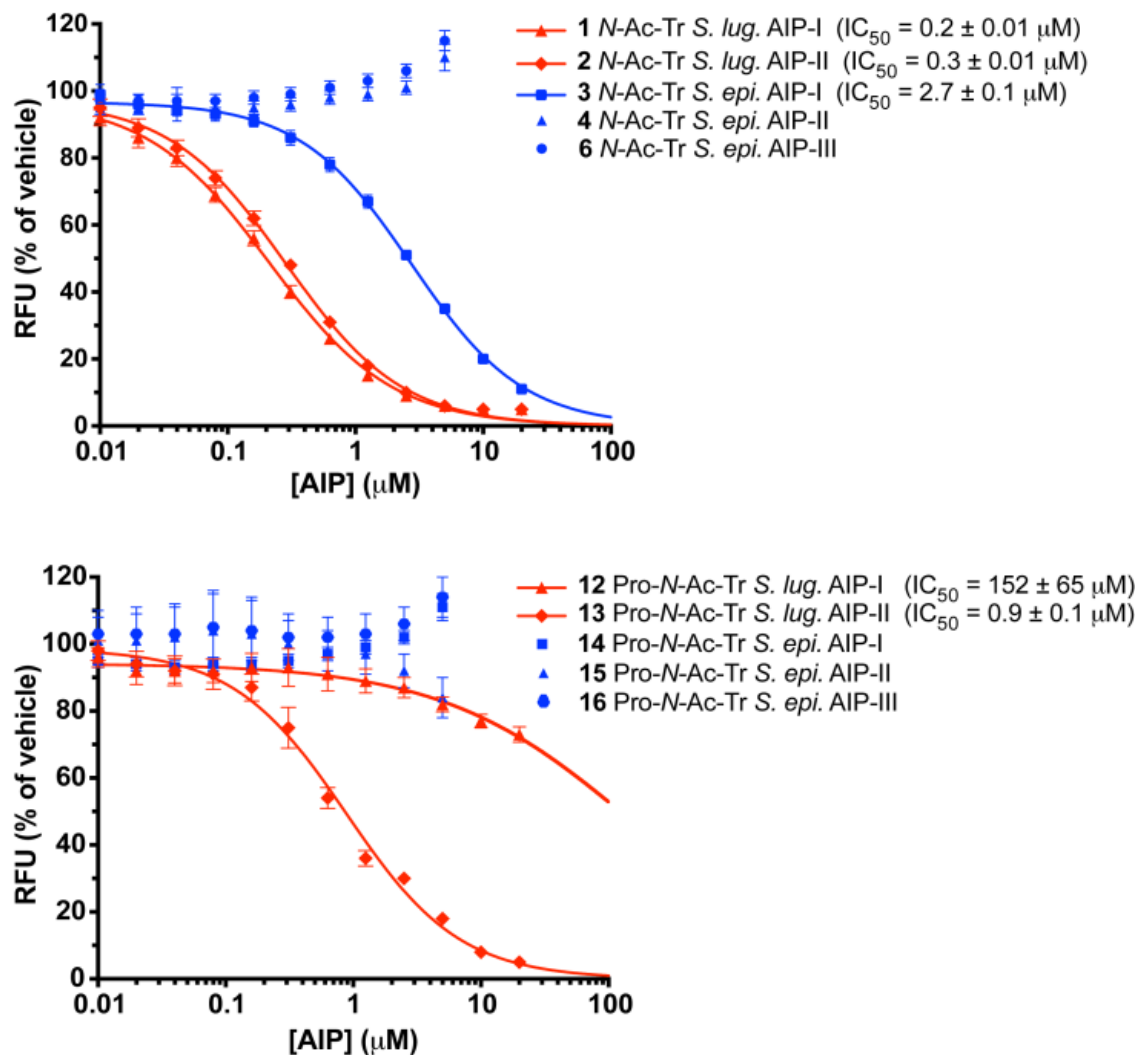

**Figure 1.** Dose-response curves and tabulated  $\text{IC}_{50}$  values for *N*-acetylated truncated analogues (A) and protected *N*-acetylated truncated analogues (B). Analogues based on *S. lugdunensis* and *S. epidermidis* AIP macrocycles are shown in red and blue, respectively. In cases where the data could be fit, the  $\text{IC}_{50}$  values are listed in the Figure key.

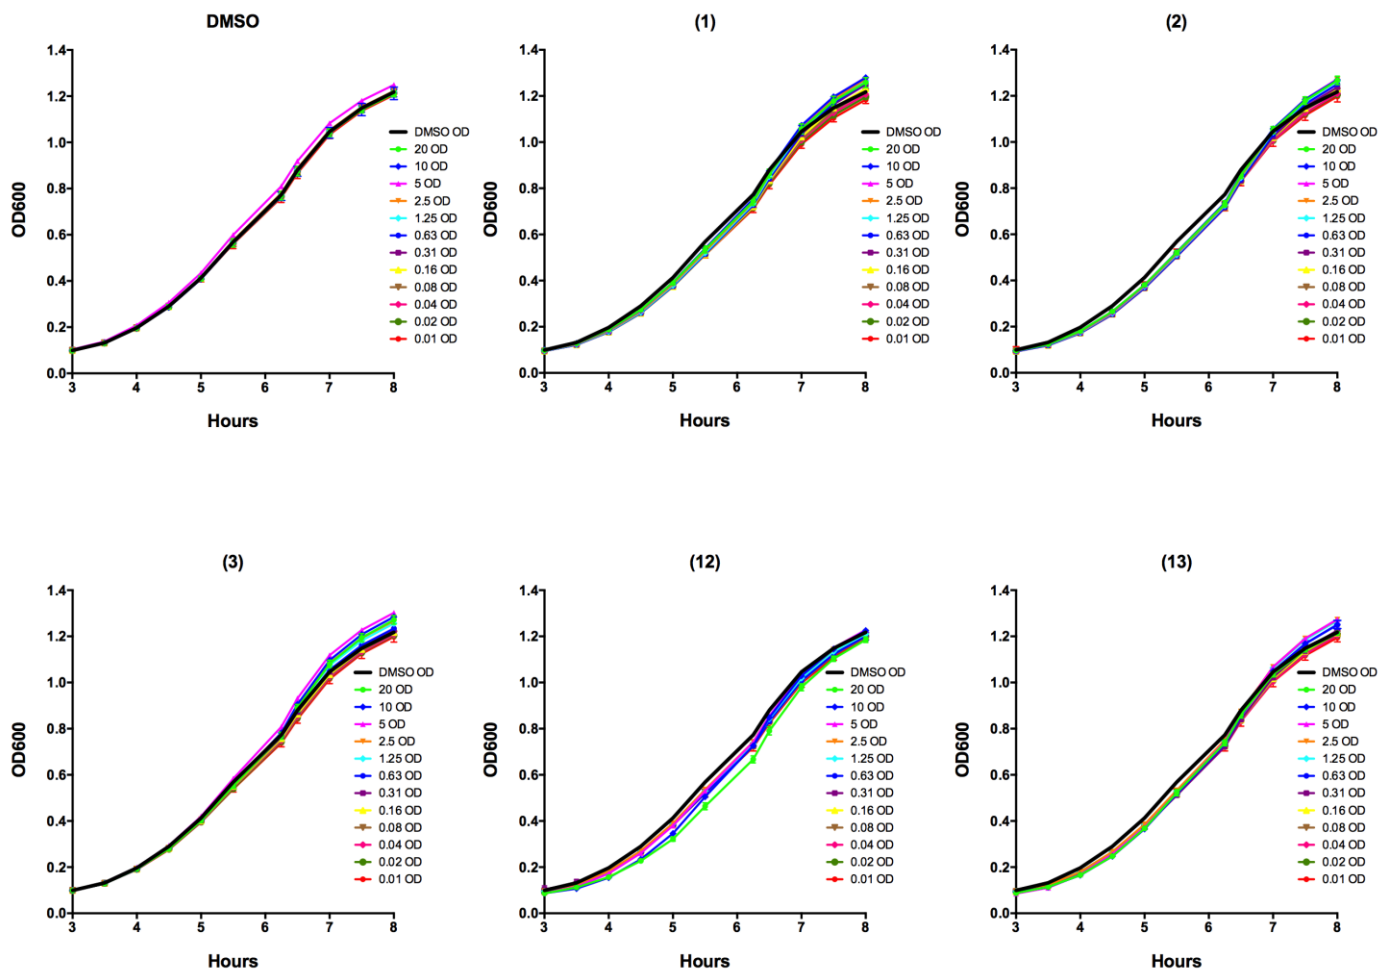

**Figure 2.** OD600 curve for DMSO control and curves for active compound 1 - 3, 12 and 13 which demonstrate that the compounds do not inhibit bacterial growth over an 8 hour period.

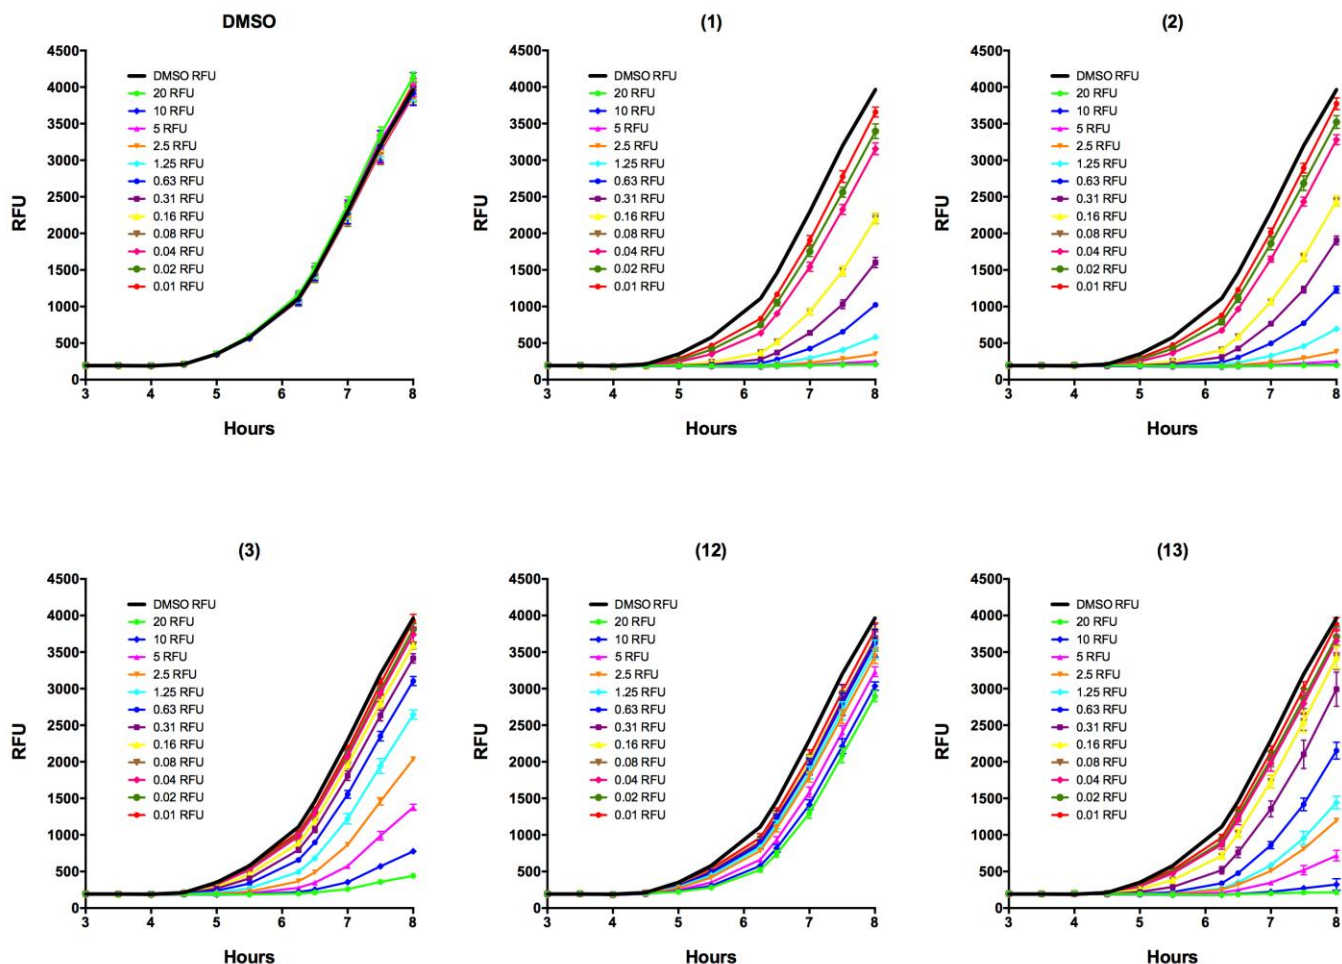

**Figure 3:** Relative fluorescence units (RFU) curve for a DMSO control and curves for active compound **1 - 3, 12** and **13** which demonstrate that the compounds do not inhibit bacterial growth over an 8 hour period.

In order to assess the ArgC inhibitory activity of the AIP analogues a *S. lugdunensis* I agr reporter strain, AH4031, was constructed by moving agrP3sGFP reporter plasmid pCM40<sup>1</sup> into *S. lugdunensis* strain N920143<sup>2</sup> using the electroporation protocol described by Heilbronner and colleagues.<sup>3</sup> Prior to electroporation into *S. lugdunensis* N920143, pCM40 was passed through *E. coli* strain SL01B,<sup>3</sup> which is engineered to express the specificity (HsdS) and methylation (HsdM) subunits of the *S. lugdunensis* N920143 type I restriction system.

Overnight cultures of AH4031, that were grown in Tryptic Soy Broth (TSB) supplemented with Cam at a concentration of 10  $\mu\text{g}/\text{mL}$ , were inoculated at a dilution of 1:500 into fresh TSB containing Cam. 100  $\mu\text{L}$  aliquots were added to 96-well microtiter plates (Costar 3603) and combined with 100  $\mu\text{L}$  aliquots of TSB containing Cam and 2-fold serial dilutions (either 10  $\mu\text{M}$  to 0.004  $\mu\text{M}$  or 40  $\mu\text{M}$  to 0.2  $\mu\text{M}$ ) of the AIP analogs (dissolved in DMSO). After mixing, the effective inoculum dilution was 1:1000 and the final AIP concentrations ranged from 5  $\mu\text{M}$  to 0.002  $\mu\text{M}$  or 20  $\mu\text{M}$  to 0.1  $\mu\text{M}$ , with a final DMSO concentration of 2% (v/v) in all wells. Four dilution series were prepared for each AIP, and 4 mock vehicle (DMSO) dilution series were also prepared. Microtiter plates were incubated at 37°C with shaking (1000 rpm) in a Stuart SI505 incubator (Bibby Scientific, Burlington, NJ) with a humidified chamber. Fluorescence (top reading, 493 nm excitation, 535 nm emission, gain 60) and

optical density (OD) readings at 600 nm were recorded at 30 min increments using a Tecan Systems (San Jose, CA) Infinite M200 plate reader. Data was transformed into units of percent of vehicle, and IC<sub>50</sub>'s were obtained by subjecting the transformed fluorescent data from 8 hours of growth to four-parameter-logistic fits (4PL) using GraphPad Prism version 6.0g. In cases where the fluorescence at the highest AIP concentration tested was insufficient to fully inhibit quorum-sensing the bottom baseline was fixed at 0%.

**Chemistry. General Methods.** Chemicals and solvents were purchased from standard suppliers and used without further purification. Fmoc-protected amino acids were purchased for Auspep as was 2-chlorotriyl chloride resin (loading 1.5 mmol/g) and (2-(6-Chloro-1H-benzotriazole-1-yl)-1,1,3,3-tetramethylaminium hexafluorophosphate) (HCTU). Polymer-bound 1-(3-Dimethylaminopropyl)-3-ethylcarbodiimide and N-benzyl-N'-cyclohexylcarbodiimide were purchased from Sigma-Aldrich with respective loadings of  $\approx 1 - 2$  mmol/g). The PS-carbodiimide was obtained from biotage (loading 1.27 mmol/g). All solvents were used as supplied (analytical, HPLC or peptide grade), without prior purification. Milli-Q water was used for chemical reactions. Deuterated DMSO-d<sub>6</sub> was purchased from Sigma Aldrich. Reactions were monitored by using analytical RP-HPLC and MS. Final compound purity was assessed *via* analytical HPLC will all biologically evaluated peptides of > 95 % purity.

Mass spectra (ES-TOF) were recorded on a Waters 2795 separation module/Micromass LCTTM platform. <sup>1</sup>H and <sup>13</sup>C spectra were recorded at 25 °C on a Varian mercury 300 operating at 299.8 MHz and 75.4 MHz respectively. Chemical shifts ( $\delta$ ) are reported in parts per million (ppm), referenced to TMS (1H, 0.0 ppm). Coupling constants (*J*) are recorded in Hz and significant multiplicities described by singlet (s), doublet (d), doublet of doublets (dd), doublet of triplets (dt), triplet (t), quadruplet (q), broad (br), multiplet (m). Spectra were assigned using appropriate gCOSY sequences.

Analytical RP-HPLC was performed using a Waters instrument comprised of two 510 pumps, a 486 detector and Millennium™ software. The systems outlined below were used for purification and to confirm purity. Analytical RP-HPLC was performed using Phenomenex Onyx Monolithic reversed-phase C18 column (4.6 x 100 mm). Solvent A: 0.06% TFA in water and solvent B: 0.06% TFA in CH<sub>3</sub>CN:H<sub>2</sub>O (90:10), flow rate of 1.0 mL/min, gradient 10-100 (%B), curve = 6, over 15.0 mins, and detection at 216 nm and 254 nm (System 1).

Semi-preparative RP-HPLC was performed using a Waters 2525 binary gradient pump equipped with a water 2487 dual  $\lambda$  absorbance detector and a Chromolith®SemiPrep RP-18e 100-10 mm column. A flow rate of 10 mL/min was used with solvent A: 0.06% TFA in water and solvent B: 0.06% TFA in CH<sub>3</sub>CN:H<sub>2</sub>O (90:10). Gradient 10-75 (%B) over 15 mins, curve = 6, with UV detection at 216 nm and 254 nm.

**General procedure 1: Fmoc-Phe-2-CITrt resin;** 2-Chlorotritylchloride resin (100-200 mesh), 1% DVB (5.00 g, loading = 1.5 mmol/g) (Merck Chemicals Ltd. # 8.55017) was swelled in DCM (50.0 mL) for 0.5 h prior to the addition of 4.0 eq. of Fmoc-Phe-OH (11.62 g, 0.03 mol), and 8.0 eq. of DIPEA (10.45 mL, 0.06 mmol). The resulting suspension was gently stirred at rt for 2 h before MeOH (5.0 mL) was added. After an additional 20 mins of gentle stirring the resin was filtered and sequentially washed with DMF (2 × 50 mL), acetonitrile (2 × 50 mL), hexanes (2 × 50 mL), and DCM (2 × 50 mL). The resin was dried overnight under high vacuum and standard UV Fmoc quantification revealed a resin loading of 0.83 mmol/g (loading = 86 %).

**Fmoc Loading Determination;** Two samples of pre-loaded dried resin (~10.0 mg each) were each added to a vial containing a freshly prepared solution of 20% piperidine in DMF (3.00 mL). The resulting suspensions were gently agitated at rt for 2 h after which 300 µL of each resin suspension was transferred to a quartz UV cuvette and an additional 2.70 mL of 20% piperidine in DMF was added. A reference cell containing 3.00 mL of 20% piperidine was placed into a UV spectrophotometer and reference was set at 290 nm. The absorbance of the cuvettes containing the settled resin was then obtained (290 nm). The loading of the resin was then determined using the following equation (final loading = average of the two resin samples):

$$\text{Loading (mmol/g)} = [(\text{Abs}_{\text{sample}})/(\text{mg of sample} \times 1.75)] \times 10$$

Theoretical loading was determined using the following equation:

$$A = B \times 1000/[1000 + (B \times (M - X))]$$

A = theoretical substitution (mmol/g)

B = substitution of resin (mmol/g)

M = molecular weight of target peptide (with all protecting groups)

X = 36 (loss of Cl on amino acid loading)

**Fmoc-Leu-2-CITrt resin;** prepared utilising general procedure 1 with 2-Chlorotritylchloride resin (100-200 mesh), 1% DVB (5.00 g, loading = 1.5 mmol/g), 4.0 eq. of Fmoc-Leu-OH (10.60 g, 0.03 mol), and 8.0 eq. of DIPEA (10.45 mL, 0.06 mmol). Fmoc quantification revealed a resin loading of 1.07 mmol/g (loading = 94 %).

**General Procedure 2, Compound 6.** Fmoc-Phe-2-Chlorotrytylchloride resin (0.14 g, 0.12 mmol, loading = 0.83 mmol/g) was

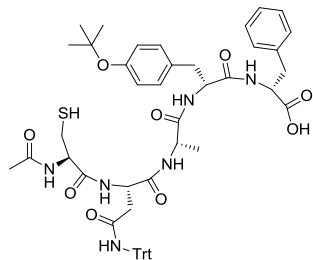

Chemical Formula:  $C_{53}H_{60}N_6O_9S$   
Exact Mass: 956.4142

placed in an Omnifit™ BenchMark™ column assembly and swelled with DMF (2.5 mL) for 0.5 h. Utilising a NovaSyn® manual peptide synthesizer Fmoc-deprotection and washing was achieved using 20% piperidine in DMF and DMF (2.8 mL/min) respectively. The column was drained and a solution of 4.0 eq. Fmoc-(tBu)Try-OH (0.22 g, 0.48 mmol), 4.0 eq. HCTU (0.19 g, 0.48 mmol), and 8.0 eq DIPEA (0.16 mL, 3.84 mmol) in DMF (1.5 mL) was added. The column was gently agitated at ~40 °C for 1 hour after which the resin was washed (DMF 2.8 mL/min), Fmoc-deprotected (20% piperidine in DMF 2.8 mL/min), and washed (DMF 2.8

mL/min). The remaining linear peptide sequence was prepared *via* subsequent rounds of acylation, washing (DMF 2.8 mL/min), Fmoc-deprotection (20% piperidine in DMF, 2.8 mL/min), and washing (DMF 2.8 mL/min). Each acylation was achieved using a solution of 4.0 eq. HCTU (0.19 g, 0.48 mmol), 8.0 eq DIPEA (0.16 mL, 3.84 mmol), DMF (1.5 mL) at ~40 °C over 1 hour and 4.0 eq. Fmoc-Ala-OH (0.14 g, 0.48 mmol), and 4.0 eq. Fmoc-(Trt)Asn-OH (0.28 g, 0.48 mmol), and Fmoc-(Mmt)Cys-OH (0.29 g, 0.48), respectively. The *N*-terminal Cys-amine was acetylated *via* addition of an acetic anhydride (0.27 mL, 2.94 mmol) DIPEA (0.51 mL, 2.94 mmol) solution. After 0.5 h the resin was washed with MeOH (2 × 5.0 mL), acetonitrile (2 × 5.0 mL), hexanes (2 × 5.0 mL), and DCM (2 × 5.0 mL) and dried *in vacuo*. Concurrent cleavage of the linear peptide from the resin and deprotection of the Cys(Mmt) protecting group was achieved *via* flushing the column with a TFA cocktail (10 × 2 mL, DCM:TFA:TIPS 96:2:2). The resulting solution was concerted *in vacuo* and the residual crude material was triturated with ice-cold ether (× 3) to furnish an off-white solid. MS (ESI<sup>+</sup>) *m/z* 957 (*M* + 1, 100 %) HRMS (ESI<sup>+</sup>) for  $C_{53}H_{61}N_6O_9S$ ; calculated 957.4142, found, 957.4146; RP-HPLC Onyx Monolithic C18 100 × 4.6 mm, 40-100% B in 15 min, *t<sub>R</sub>* 9.5 min.

Data File D:\2014\CH...POUNDS\ALCL3 CPGP135 TEMP VARIATIONS 2015-08-05 10-36-58\053-0301.D  
Sample Name: Ac-CNAYF-OH uncyclised

```
=====
Acq. Operator   : SYSTEM                      Seq. Line :    3
Acq. Instrument : LC1260                      Location  : Vial 53
Injection Date  : 8/5/2015 11:41:17 AM       Inj       :    1
                                           Inj Volume: 10.000 µl
Acq. Method     : D:\2014\CHRIS\DATA\DDCOPPERCOMPOUNDS\ALCL3 CPGP135 TEMP VARIATIONS 2015-08-
                  05 10-36-58\40 TO 100 OVER 15 MINS 10UL.M
Last changed    : 8/5/2015 10:36:58 AM by SYSTEM
Analysis Method : D:\2014\CHRIS\DATA\DDCOPPERCOMPOUNDS\ALCL3 CPGP135 TEMP VARIATIONS 2015-08-
                  05 10-36-58\40 TO 100 OVER 15 MINS 10UL.M (Sequence Method)
Last changed    : 8/5/2015 12:34:49 PM by SYSTEM
                  (modified after loading) (Current integration events modified)
=====
```

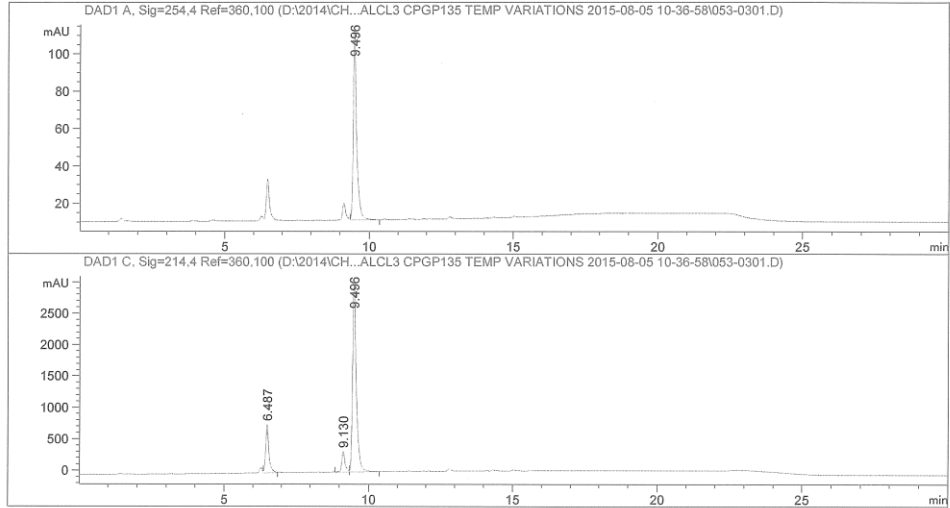

=====  
Fraction Information  
=====

No Fractions found.  
=====

=====  
Area Percent Report  
=====

```
Sorted By      : Signal
Multiplier     : 1.0000
Dilution       : 1.0000
Use Multiplier & Dilution Factor with ISTDs
```



20151209\_Tr\_S\_Lug\_AIP\_I\_Linear 87 (0.299) Sm (SG, 2x0.50); Cm (49:89)

1: MS2 ES+  
5.99e6

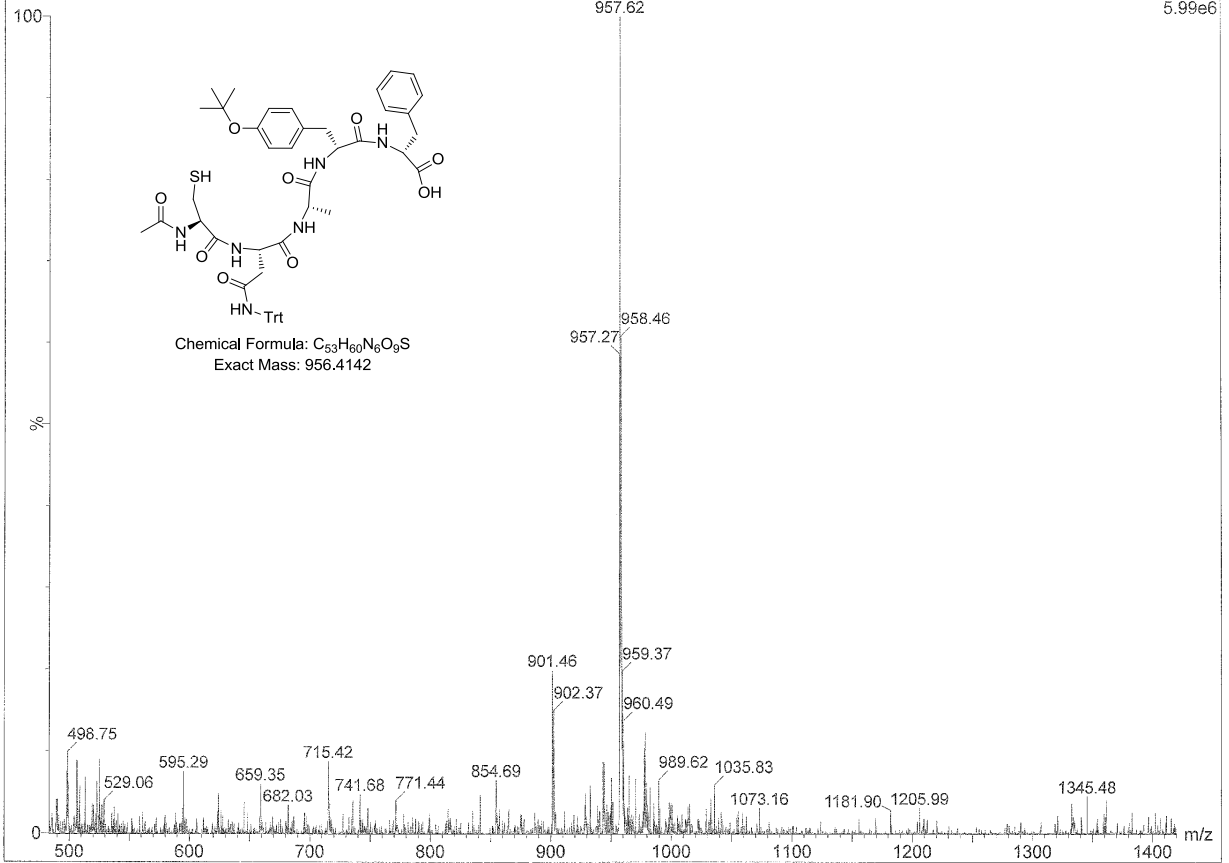

**General Procedure 3 Compound 7;** A suspension of the crude linear peptide and 3.0 eq. of PS-carbodiimide (0.28g, 0.36 mmol) and CH<sub>3</sub>Cl (120 mL, 1.0 mM) was then stirred under an atmosphere of nitrogen for 5 h. After this period the solution was filtered, concentrated *in vacuo*, purified *via* semi-preparative RP-HPLC, and lyophilised to afford **7** (12 mg, 10.6 %). (*Note; 3 mg of this sample was collect for biological analysis*) MS (ESI<sup>+</sup>) for C<sub>53</sub>H<sub>59</sub>N<sub>6</sub>O<sub>8</sub>S; *m/z* 939.29 (M + 1, 100 %); HRMS (ESI<sup>+</sup>) for C<sub>53</sub>H<sub>59</sub>N<sub>6</sub>O<sub>8</sub>S; calculated 939.4037, found, 939.4042; RP-HPLC Onyx Monolithic C18 100 × 4.6 mm, 10-100% B in 15 min, *t<sub>R</sub>* 13.75 min.

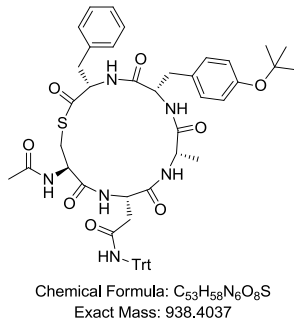

Data File C:\CHEM32\1\DATA\SAMPLES SENT TO IOWA 2015-11-26 10-00-46\069-0901.D  
Sample Name: Pro S lug AIP I cyclised

```

=====
Acq. Operator   : SYSTEM                      Seq. Line :    9
Acq. Instrument : LC1260                      Location  : Vial 69
Injection Date  : 11/26/2015 2:14:33 PM      Inj       :    1
                                           Inj Volume: 20.000 µl
Acq. Method     : C:\CHEM32\1\DATA\SAMPLES SENT TO IOWA 2015-11-26 10-00-46\10 TO 100 OVER 15
                                           MINS 20UL.M
Last changed    : 11/26/2015 10:00:46 AM by SYSTEM
Analysis Method : C:\CHEM32\1\DATA\SAMPLES SENT TO IOWA 2015-11-26 10-00-46\10 TO 100 OVER 15
                                           MINS 20UL.M (Sequence Method)
Last changed    : 12/1/2015 10:39:28 AM by SYSTEM
                 (modified after loading) (Current integration events modified)
  
```

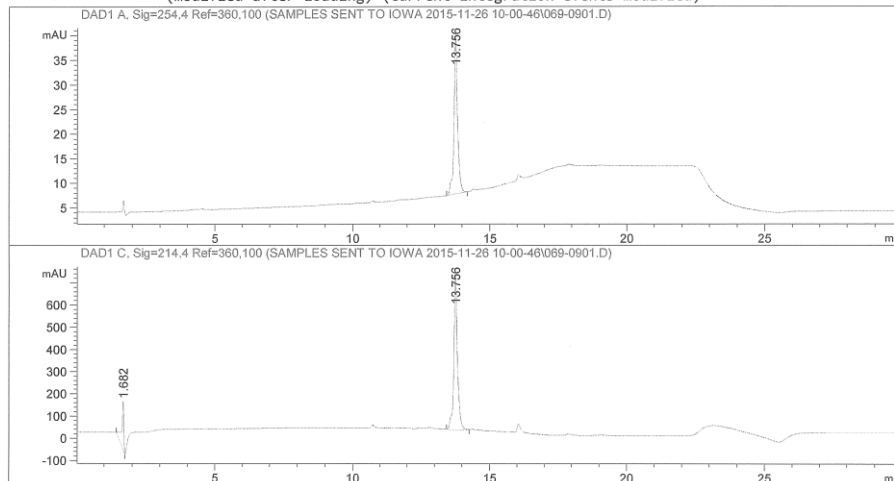

=====  
Fraction Information  
=====

No Fractions found.

=====  
Area Percent Report  
=====

```

Sorted By      : Signal
Multiplier     : 1.0000
Dilution       : 1.0000
Use Multiplier & Dilution Factor with ISTDs
  
```

Off HPLC

20150806\_Chris\_Slug\_1\_2 55 (0.189) Sm (SG, 2x0.50); Cm (36.92)

1: MS2 ES+  
7.84e5

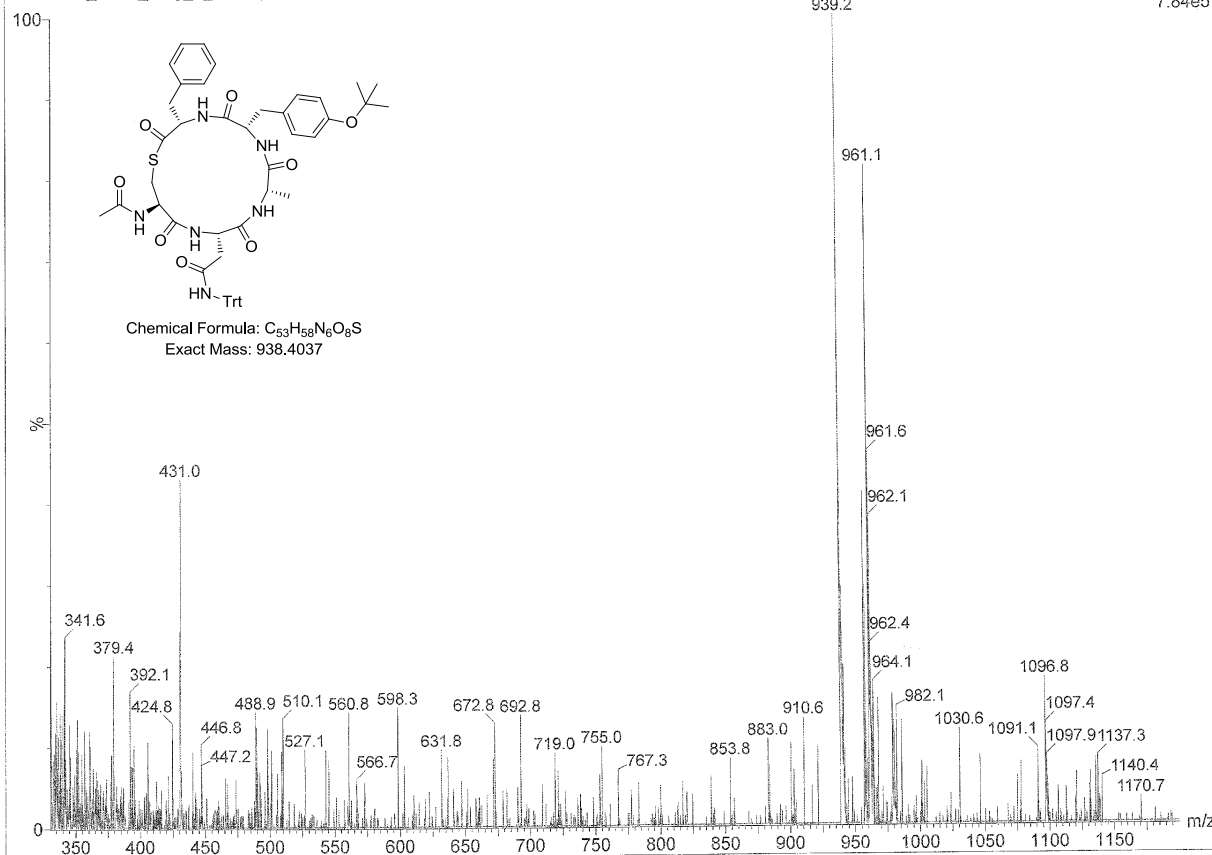

**General Procedure 4; Compound 1;** A solution of a TFA (10.0 mL), TIPS (0.25 mL), H<sub>2</sub>O (0.25 mL), and **7** (9 mg, 0.009

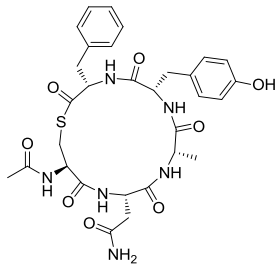

Chemical Formula: C<sub>30</sub>H<sub>36</sub>N<sub>6</sub>O<sub>8</sub>S  
Exact Mass: 640.2315

mmol) was stirred at rt for 6 h. The resulting mixture was concentrated *in vacuo* and the residual crude material was triturated with ice-cold ether (× 3) to furnish an off-white solid. The crude material was purified by *via* semi-preparative RP-HPLC to afford compound **1** (5.2 mg, 85%) as a white solid. MS (ESI<sup>+</sup>) for C<sub>30</sub>H<sub>37</sub>N<sub>6</sub>O<sub>8</sub>S *m/z* 641.56 (M + 1, 100%); HRMS (ESI<sup>+</sup>); calculated 641.2315, found 641.2309. RP-HPLC Onyx Monolithic C18 100 × 4.6 mm, 10-100% B in 15 min, *t*<sub>R</sub> 6.08 min. <sup>1</sup>H NMR (300 MHz, DMSO) δ 9.13 (s, 1H), 8.27 (d, *J* = 7.6 Hz, 1H), 8.10 (d, *J* = 7.7 Hz, 1H), 7.95 (d, *J* = 7.8 Hz, 1H), 7.93 – 7.88 (m, 2H), 7.43 (s, 1H), 7.30 – 7.14 (m, 5H), 6.98 (d, *J* = 8.4 Hz, 3H), 6.60 (d, *J* = 8.4 Hz, 2H), 4.49 (q, *J* = 6.7 Hz, 1H), 4.42 – 4.27 (m, 3H), 4.15 – 4.02 (m, 1H), 3.05 (d, *J* = 5.9 Hz, 1H), 3.00 (d, *J* = 5.8 Hz, 1H), 2.95 – 2.79 (m, 3H), 2.79 – 2.50 (m, 5H), 2.46 – 2.38 (m, 1H), 2.30 (t, *J* = 8.4 Hz, 1H), 1.84 (d, *J* = 3.4 Hz, 3H), 1.07 (d, *J* = 7.1 Hz, 3H). <sup>13</sup>C NMR (75 MHz, DMSO) δ 172.98, 172.35, 172.23, 172.04, 171.38, 171.09, 170.95, 170.32, 170.12, 156.09, 137.77, 130.52, 129.55, 128.64, 128.35, 126.87, 115.27, 55.51, 54.63, 53.97, 50.26, 49.14, 37.29, 37.19, 36.72, 26.57, 22.92, 18.23.

Data File C:\CHEM32\...CYCLISATION AND CPGP175 DEPROTECTION 2015-12-10 16-43-38\046-3201.D  
Sample Name: Tr S lug AIP I

```

=====
Acq. Operator   : Simil20102015           Seq. Line : 32
Acq. Instrument : LCL260                 Location  : Vial 46
Injection Date  : 12/11/2015 9:11:57 AM   Inj       : 1
                                           Inj Volume: 100.000 µl
Acq. Method    : C:\CHEM32\1\DATA\DEMO\CYCLISATION AND CPGP175 DEPROTECTION 2015-12-10
16-43-38\10 TO 100 OV 15MIN 100UL.M
Last changed   : 12/10/2015 4:12:03 PM by Simil20102015
Analysis Method : C:\CHEM32\1\DATA\CPGL70S AND PS CYCLISATION 2015-12-14 09-26-38\10 TO
100 OV 15MIN 5UL.M
Last changed   : 12/14/2015 11:20:50 AM by Simil20102015
(modified after loading) (Current integration events modified)
=====

```

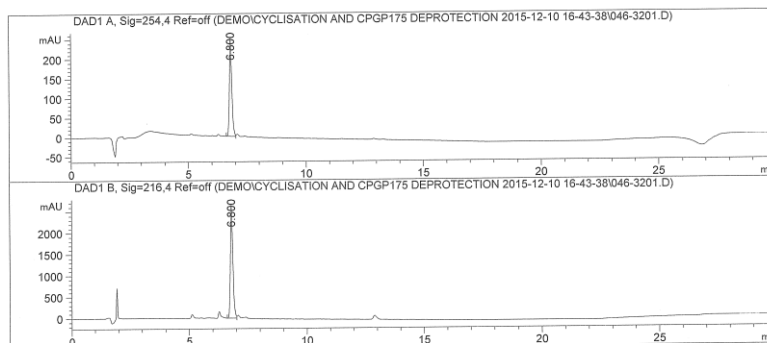

=====  
Area Percent Report  
=====

```

Sorted By      :      Signal
Multiplier:    :      1.0000
Dilution:      :      1.0000
Use Multiplier & Dilution Factor with ISTDs

```

Signal 1: DAD1 A, Sig=254,4 Ref=off

| Peak #   | RetTime [min] | Type | Width [min] | Area [mAU*s] | Height [mAU] | Area %   |
|----------|---------------|------|-------------|--------------|--------------|----------|
| 1        | 6.800         | BV   | 0.1049      | 1785.58350   | 251.35371    | 100.0000 |
| Totals : |               |      |             | 1785.58350   | 251.35371    |          |

Signal 2: DAD1 B, Sig=216,4 Ref=off

| Peak # | RetTime [min] | Type | Width [min] | Area [mAU*s] | Height [mAU] | Area %   |
|--------|---------------|------|-------------|--------------|--------------|----------|
| 1      | 6.800         | BV   | 0.1102      | 1.96317e4    | 2657.20728   | 100.0000 |

20151209\_Tr\_S\_lug\_AIP\_1 81 (0.278) Sm (SG, 2x0.50); Cm (64:81)

1: MS2 ES+  
1.84e7

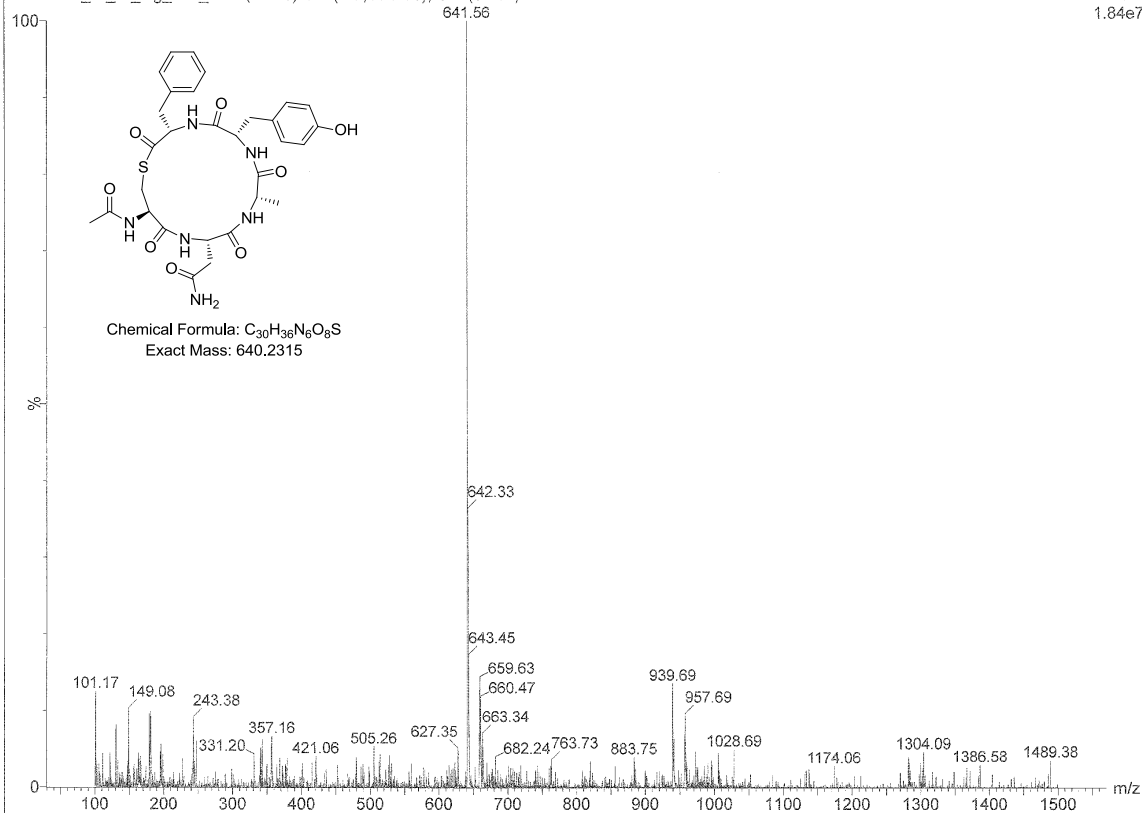

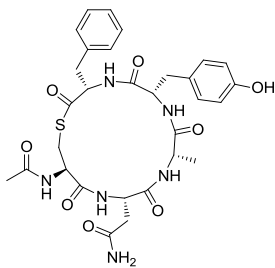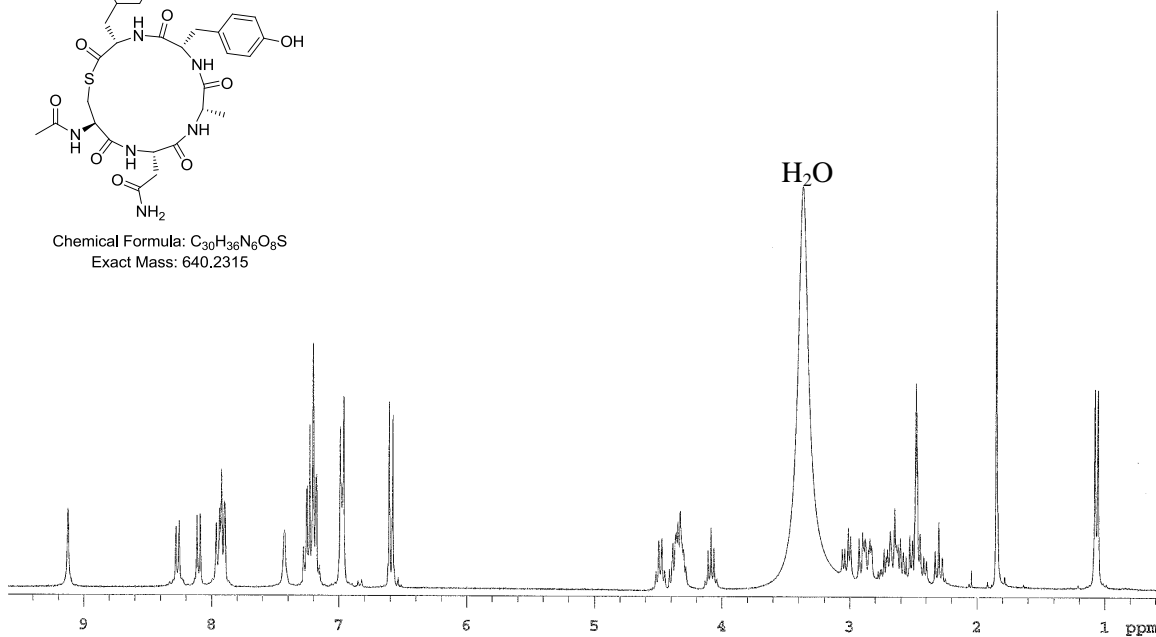

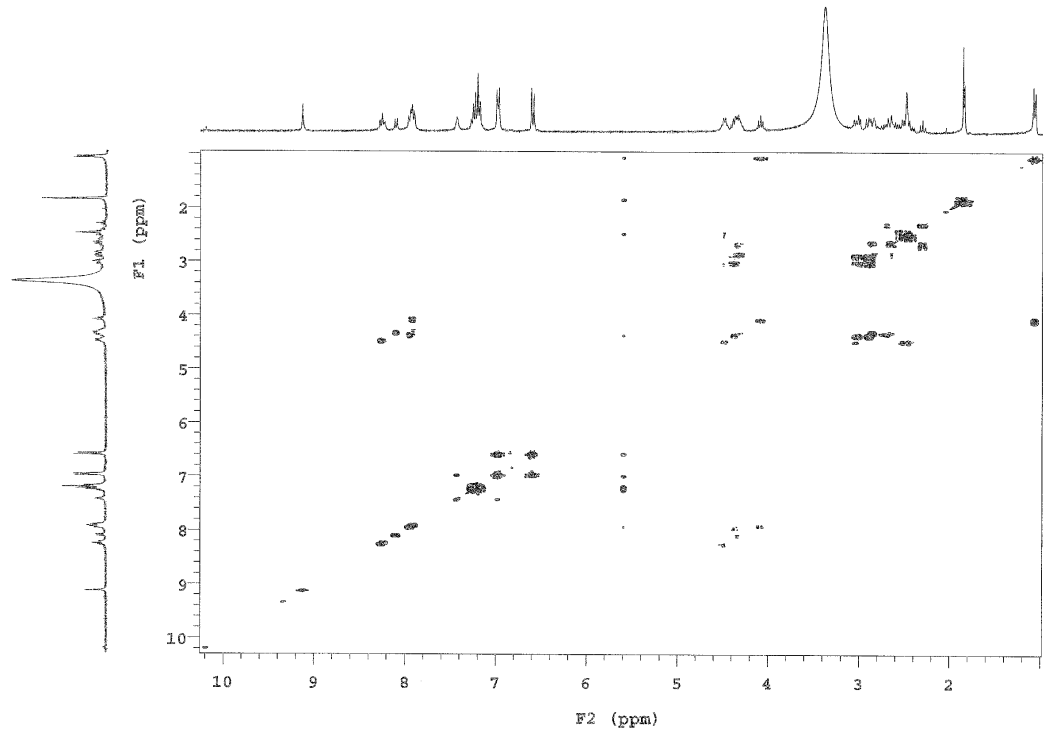

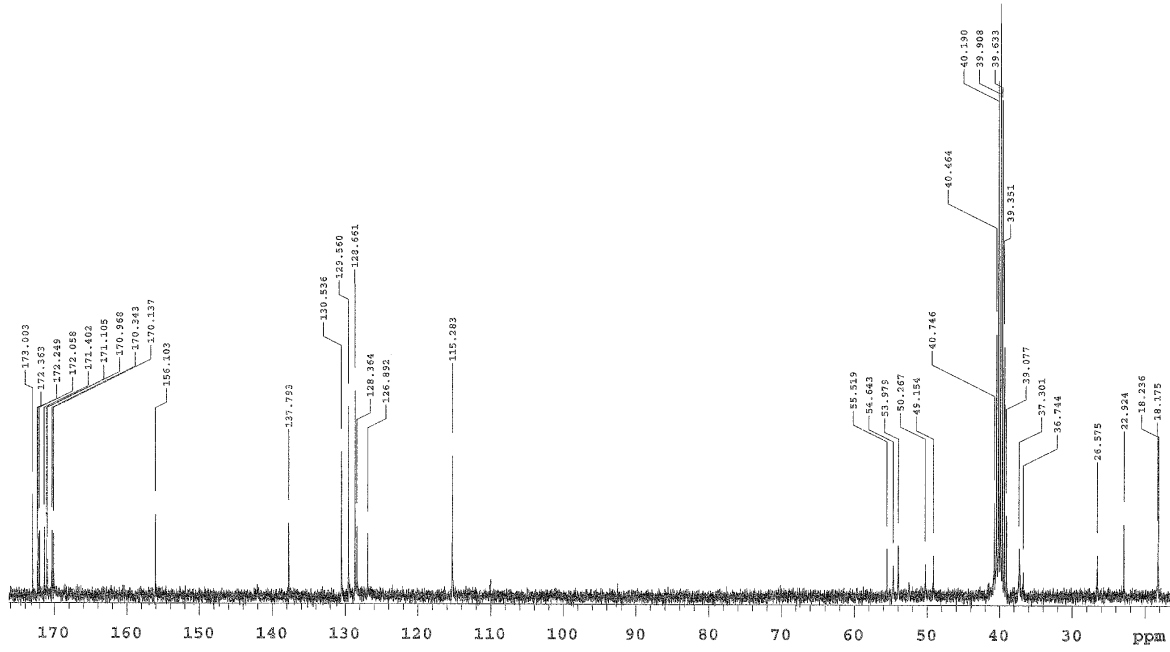



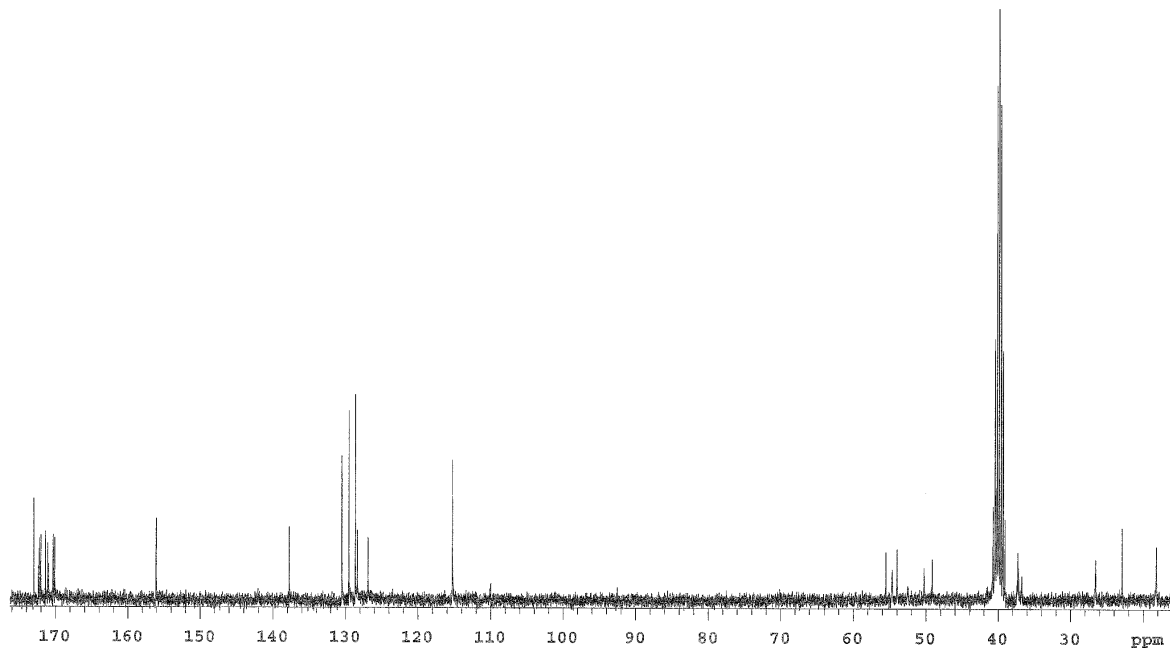

**Compounds 11 & 2;** The linear sequence required for **compound 11** was prepared using general procedure 2. The residual crude material was triturated with ice-cold ether ( $\times 3$ ) to furnish an off-white solid. MS (ESI<sup>+</sup>) for C<sub>52</sub>H<sub>59</sub>N<sub>6</sub>O<sub>9</sub>S; calculated 943.40, found, 943.51. RP-HPLC Onyx Monolithic C18 100  $\times$  4.6 mm, 40-100% B in 15 min, *t*<sub>R</sub> 9.1 min.

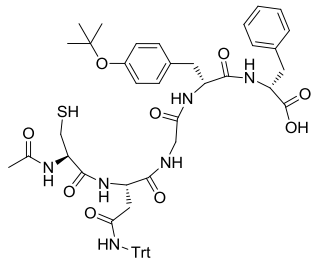

Chemical Formula: C<sub>52</sub>H<sub>59</sub>N<sub>6</sub>O<sub>9</sub>S  
Exact Mass: 942.3986

Data File D:\2014\CH...POUNDS\ALCL3 CPGP135 TEMP VARIATIONS 2015-08-05 10-36-58\051-0101.D  
Sample Name: Ac-CNGYF-OH uncyclised

```

=====
Acq. Operator   : SYSTEM                      Seq. Line :    1
Acq. Instrument : LC1260                     Location  : Vial 51
Injection Date  : 8/5/2015 10:38:23 AM       Inj       :    1
                                           Inj Volume: 10.000 µl
Method         : D:\2014\CHRIS\DATA\DDCOPPERCOMPOUNDS\ALCL3 CPGP135 TEMP VARIATIONS 2015-08-05 10-36-58\40 TO 100 OVER 15 MINS 10UL.M (Sequence Method)
Last changed   : 8/5/2015 10:36:58 AM by SYSTEM
                (modified after loading) (Current integration events modified)
    
```

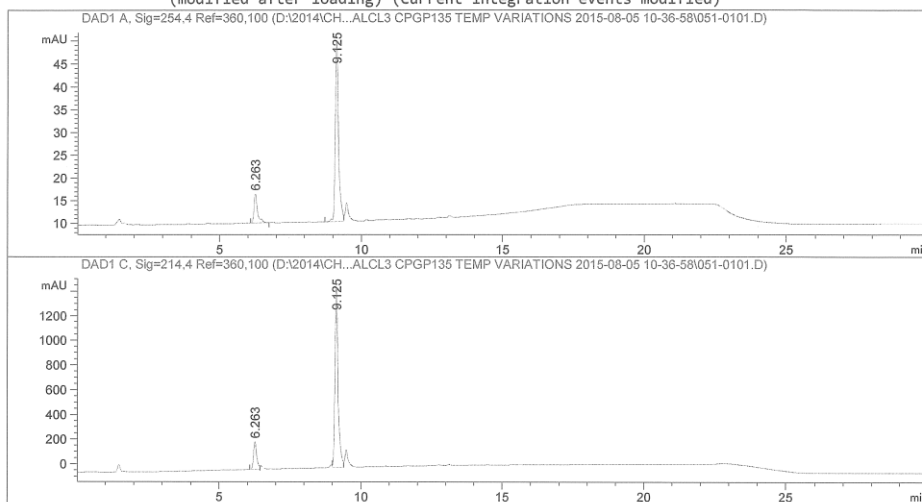

=====  
Fraction Information  
=====

No Fractions found.  
=====

=====  
Area Percent Report  
=====

```

Sorted By      :      Signal
Multiplier     :      1.0000
Dilution       :      1.0000
Use Multiplier & Dilution Factor with ISTDs
    
```

Signal 1: DAD1 A, Sig=254,4 Ref=360,100

| Peak # | RetTime [min] | Type | Width [min] | Area [mAU*s] | Height [mAU] | Area %  |
|--------|---------------|------|-------------|--------------|--------------|---------|
| 1      | 6.263         | BB   | 0.1276      | 55.50295     | 6.37214      | 15.1200 |
| 2      | 9.125         | BV   | 0.1160      | 311.57983    | 39.52258     | 84.8800 |

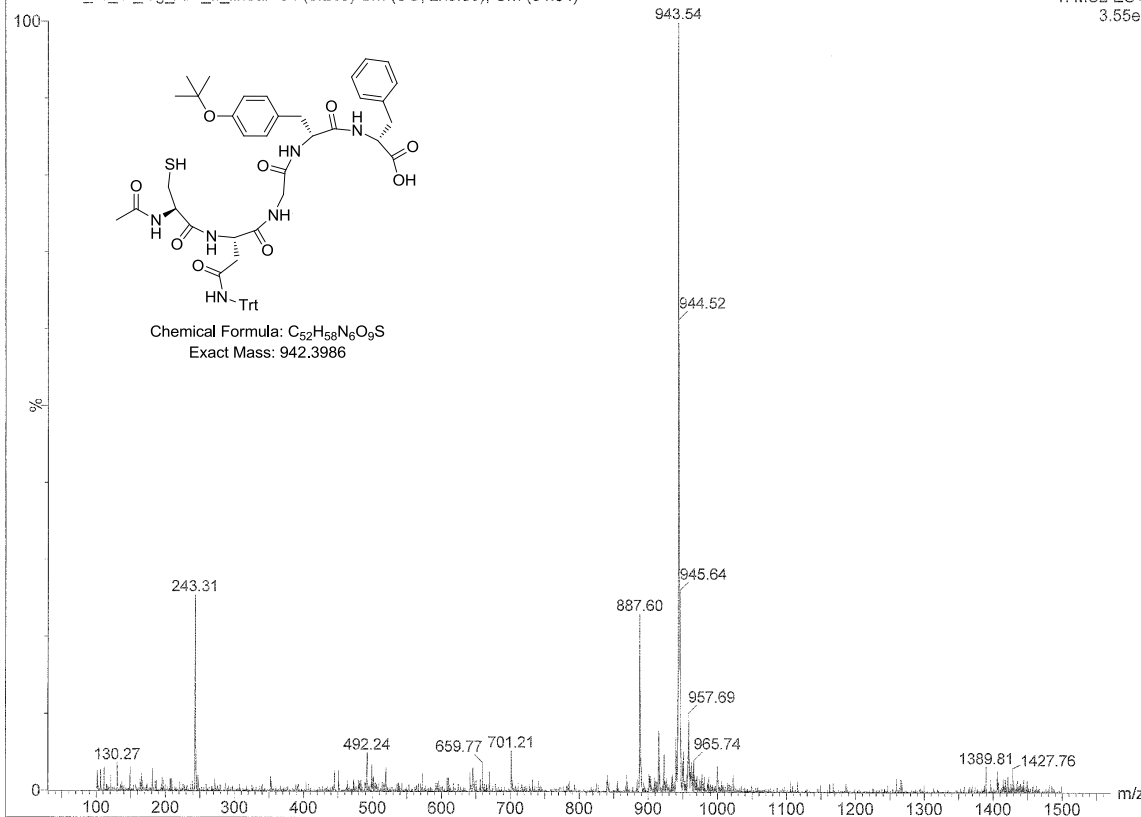

**Compound 11**; Compound **11** was synthesised utilizing general produce 3. The crude material was purified *via* semi-preparative RP-HPLC, and lyophilised to afford **11** (15 mg, 13.5 %). (*Note*; 3 mg of this sample was collect for biological analysis) MS (ESI<sup>+</sup>) for C<sub>52</sub>H<sub>57</sub>N<sub>6</sub>O<sub>8</sub>S m/z 925.2 (M + 1, 100%); HRMS (ESI<sup>+</sup>); calculated 925.3880, found, 925.3497. RP-HPLC Onyx Monolithic C18 100 × 4.6 mm, 10-100% B in 15 min, t<sub>R</sub> 13.03 min.

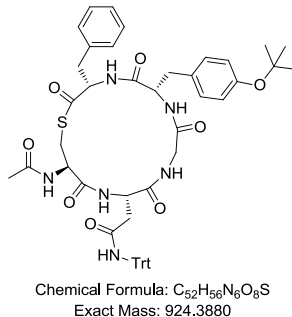

Data File C:\CHEM32\1\DATA\SAMPLES SENT TO IOWA 2015-11-26 10-00-46\072-1201.D  
Sample Name: Pro S lug AIP II cyclised

```

=====
Acq. Operator   : SYSTEM                      Seq. Line :   12
Acq. Instrument : LC1260                      Location  : Vial 72
Injection Date  : 11/26/2015 3:49:03 PM       Inj       :    1
                                           Inj Volume: 20.000 µl

Acq. Method    : C:\CHEM32\1\DATA\SAMPLES SENT TO IOWA 2015-11-26 10-00-46\10 TO 100 OVER 15
                                           MINS 20UL.M
Last changed   : 11/26/2015 10:00:46 AM by SYSTEM
Analysis Method : C:\CHEM32\1\DATA\SAMPLES SENT TO IOWA 2015-11-26 10-00-46\10 TO 100 OVER 15
                                           MINS 20UL.M (Sequence Method)
Last changed   : 12/1/2015 10:41:51 AM by SYSTEM
                                           (modified after loading) (Current integration events modified)
  
```

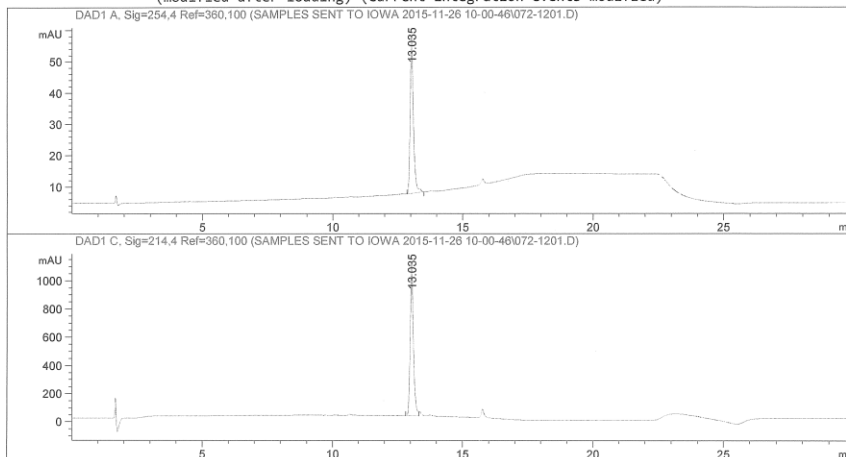

=====  
Fraction Information  
=====

No Fractions found.

=====  
Area Percent Report  
=====

```

Sorted By      : Signal
Multiplier     : 1.0000
Dilution       : 1.0000
Use Multiplier & Dilution Factor with ISTDs
  
```

Off HPLC

20150806\_Chris\_Slug\_2\_2 59 (0.203) Sm (SG, 2x0.50); Cm (37:100)

1: MS2 ES+  
5.67e6

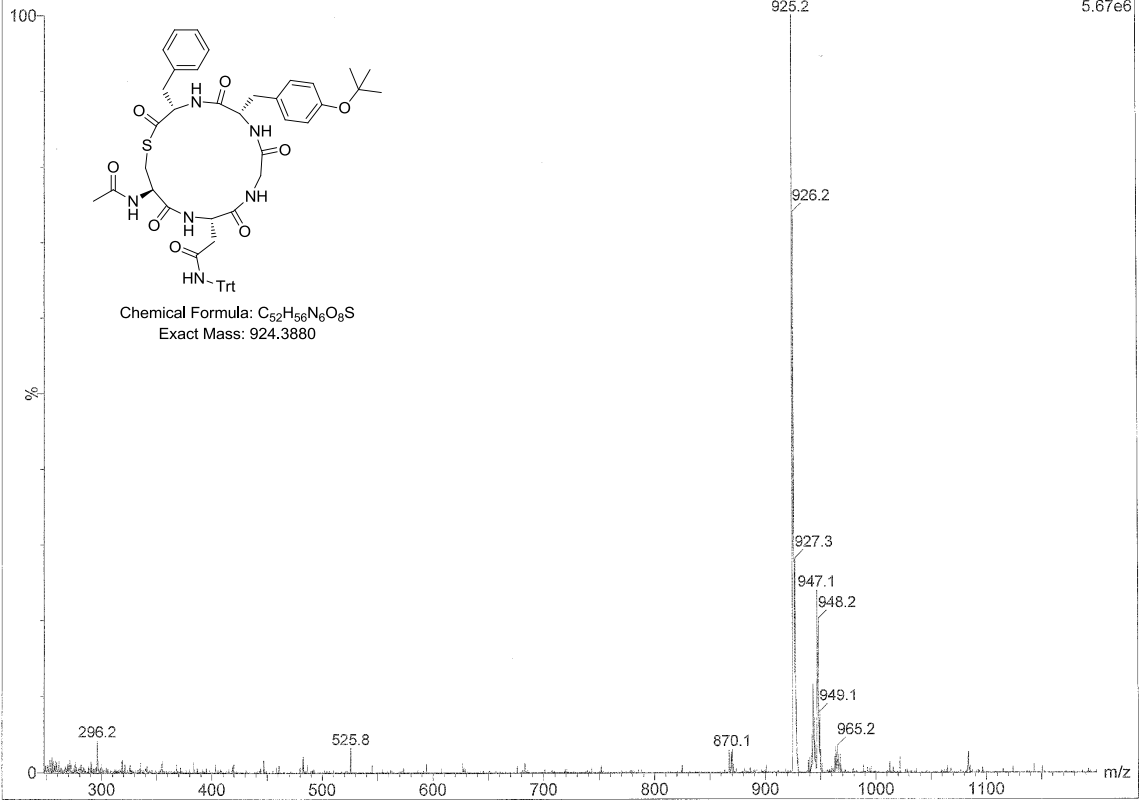

**Compound 2**; Compound 2 was prepared utilizing general procedure 4 with compound 11. The crude material was purified *via*

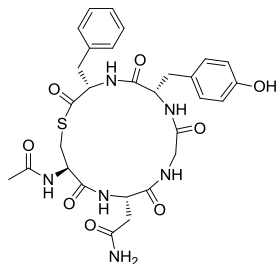

Chemical Formula: C<sub>29</sub>H<sub>34</sub>N<sub>6</sub>O<sub>8</sub>S  
Exact Mass: 626.2159

semi-preparative RP-HPLC, and lyophilised to afford 2 (7.2 mg, 88.5 %). MS (ESI<sup>+</sup>) for C<sub>52</sub>H<sub>57</sub>N<sub>6</sub>O<sub>8</sub>S, *m/z* 627.2 (M + 1, 100%); HRMS (ESI<sup>+</sup>); calculated 627.2159, found, 627.2204. RP-HPLC Onyx Monolithic C18 100 × 4.6 mm, 10-100% B in 15 min, *t<sub>R</sub>* 6.48 min. <sup>1</sup>H NMR (300 MHz, DMSO) δ 9.12 (s, 1H), 8.28 (d, *J* = 7.5 Hz, 1H), 8.17 (d, *J* = 7.8 Hz, 1H), 8.09 (d, *J* = 7.8 Hz, 1H), 7.97 (t, *J* = 5.5 Hz, 1H), 7.89 (d, *J* = 8.6 Hz, 1H), 7.39 (s, 1H), 7.28 – 7.16 (m, 5H), 6.98 (d, *J* = 8.5 Hz, 2H), 6.59 (d, *J* = 8.5 Hz, 2H), 4.47 (dd, *J* = 13.6, 7.0 Hz, 1H), 4.42 – 4.30 (m, 3H), 3.58 (t, *J* = 5.9 Hz, 2H), 3.06 (d, *J* = 5.5 Hz, 1H), 3.01 (d, *J* = 5.4 Hz, 1H), 2.92 (d, *J* = 8.7 Hz, 1H), 2.89 – 2.52 (m, 7H), 2.43 (d, *J* = 7.0 Hz, 1H), 2.29 (t, *J* = 8.5 Hz, 1H), 1.85 (s, 3H). <sup>13</sup>C NMR (75 MHz, DMSO) δ 173.08, 172.07, 171.57, 171.46, 170.44, 170.15, 168.63, 156.09, 137.84, 130.55, 129.54, 128.65, 128.35, 126.89, 115.28, 55.50, 54.54, 54.51, 54.00, 50.39, 42.41, 37.26, 37.14, 37.04, 26.49, 22.92.

Data File C:\CHEM32\...\O\PURIFIED TR S EPI AND S LUG AIPS#2 2015-12-17 13-51-21\090-0401.D  
Sample Name: Tr S lug AIP II 6.4 min

```

=====
Acq. Operator   : Simil20102015                      Seq. Line :    4
Acq. Instrument : LC1260                            Location  : Vial 90
Injection Date  : 12/17/2015 3:28:30 PM              Inj       :    1
                                           Inj Volume: 100.000 µl
Acq. Method     : C:\CHEM32\1\DATA\DEMO\PURIFIED TR S EPI AND S LUG AIPS#2 2015-12-17 13-
51-21\10 TO 100 OV 15MIN 100UL.M
Last changed    : 12/10/2015 4:12:03 PM by Simil20102015
Analysis Method : C:\CHEM32\1\DATA\DEMO\PURIFIED TR S EPI AND S LUG AIPS 2016-01-05 09-
33-14\10 TO 100 OV 15MIN 20UL.M
Last changed    : 1/6/2016 1:51:31 PM by Simil20102015
                  (modified after loading) (Current integration events modified)
=====

```

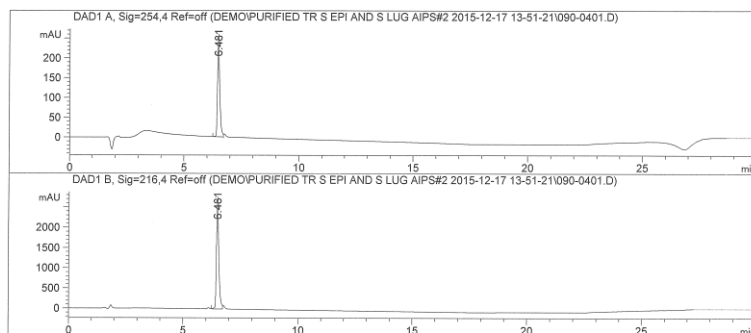

=====  
Area Percent Report  
=====

Sorted By : Signal  
Multiplier: : 1.0000  
Dilution: : 1.0000  
Use Multiplier & Dilution Factor with ISTDs

Signal 1: DAD1 A, Sig=254,4 Ref=off

| Peak # | RetTime [min] | Type | Width [min] | Area [mAU*s] | Height [mAU] | Area %   |
|--------|---------------|------|-------------|--------------|--------------|----------|
| 1      | 6.481         | BV   | 0.1004      | 1733.96338   | 257.95151    | 100.0000 |

Totals : 1733.96338 257.95151

Signal 2: DAD1 B, Sig=216,4 Ref=off

| Peak # | RetTime [min] | Type | Width [min] | Area [mAU*s] | Height [mAU] | Area %   |
|--------|---------------|------|-------------|--------------|--------------|----------|
| 1      | 6.481         | VV   | 0.1084      | 1.99227e4    | 2753.27295   | 100.0000 |

From vial

20150909\_ChrisGordon\_SlugAlPlla 107 (0.368) Sm (SG, 2x0.50); Cm (78:162)

1: MS2 ES+  
3.83e7

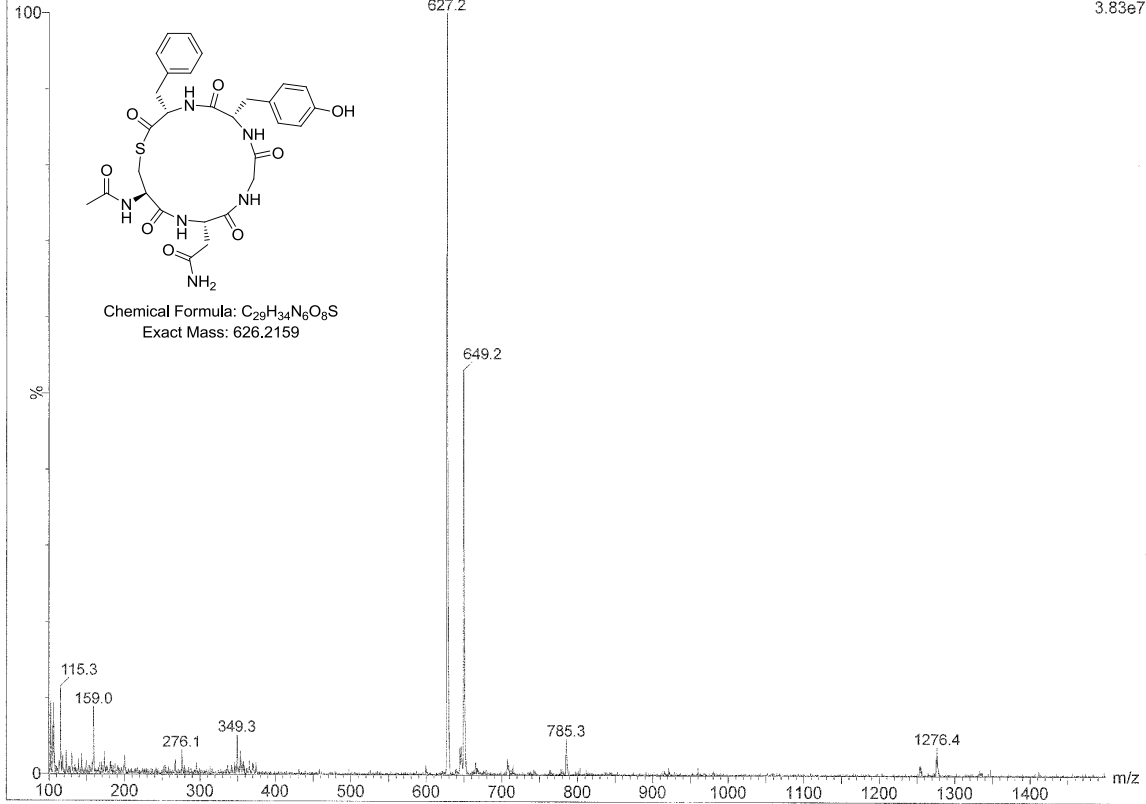

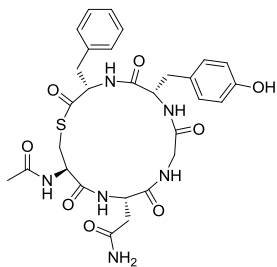

Chemical Formula: C<sub>26</sub>H<sub>34</sub>N<sub>6</sub>O<sub>8</sub>S  
Exact Mass: 626.2159

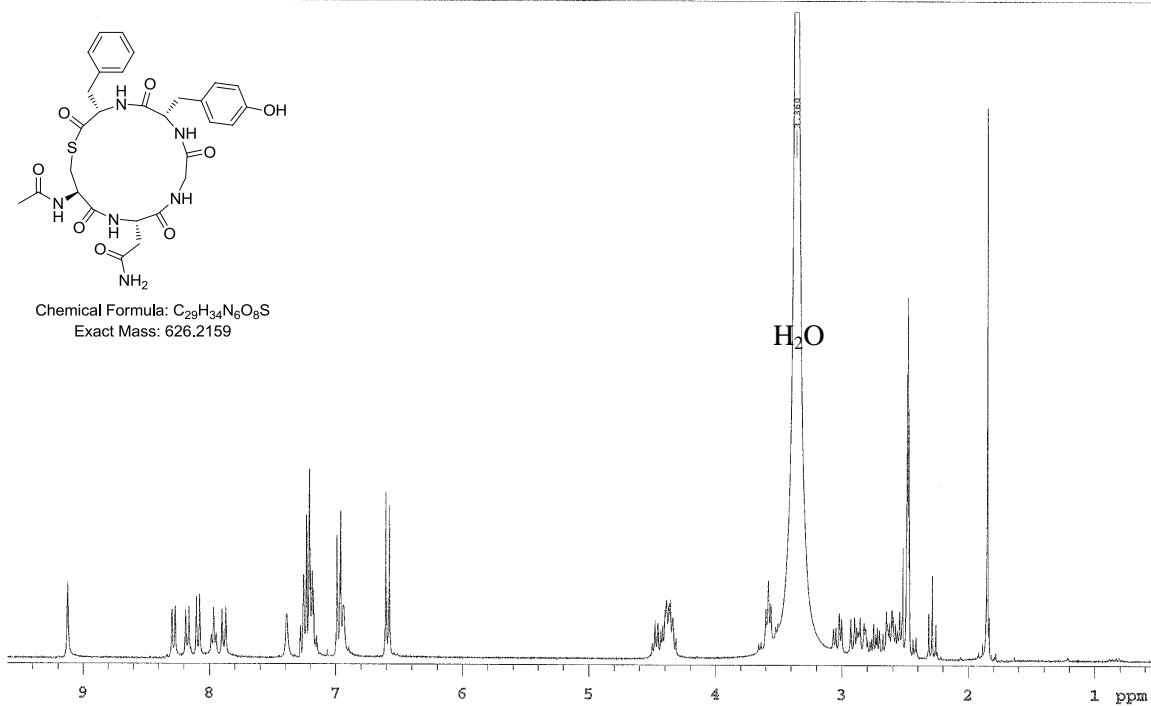



tr\_S\_Lug\_AIPIL\_gCOSY

Sample Name tr\_S\_Lug\_AIPIL\_gCOSY  
Date collected 2016-03-10

Pulse sequence gCOSY  
Solvent dmsc

Temperature 25  
Spectrometer uwsm300.uws.edu.au-mercury300

Study owner nmr300  
Operator nmr300

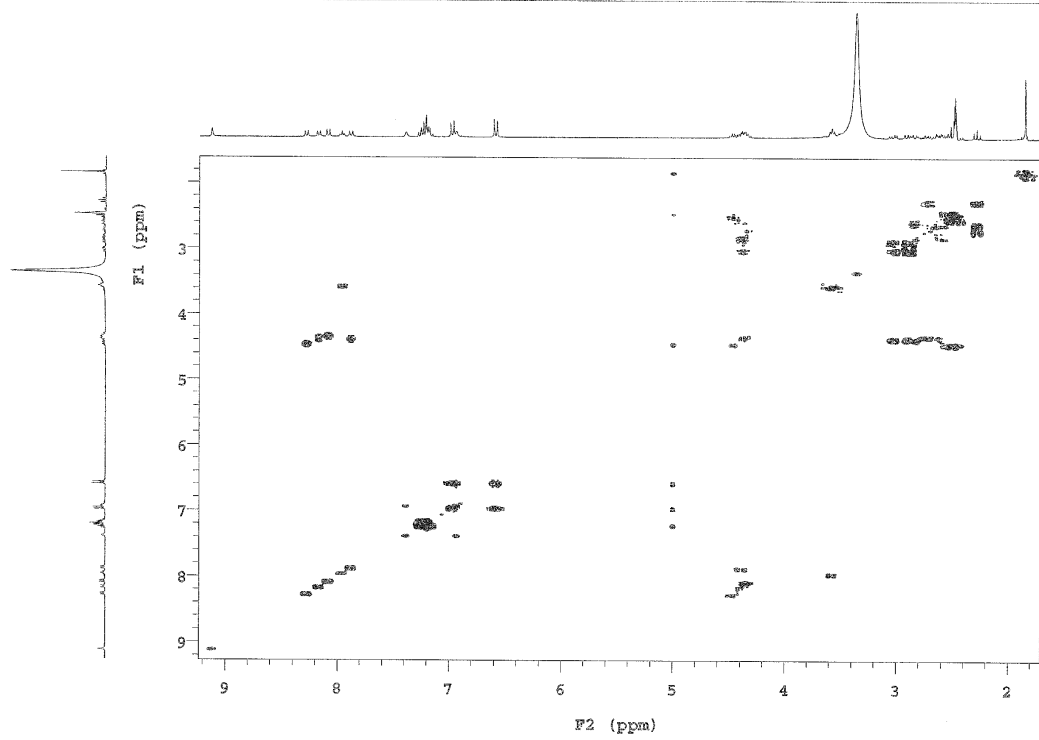

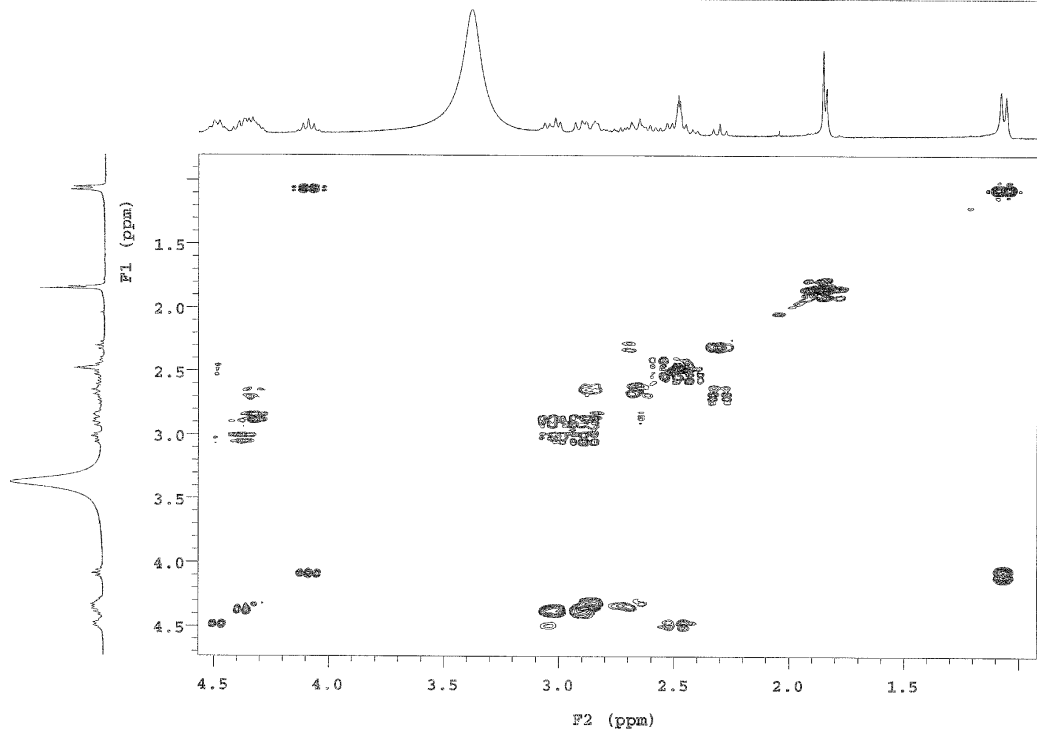

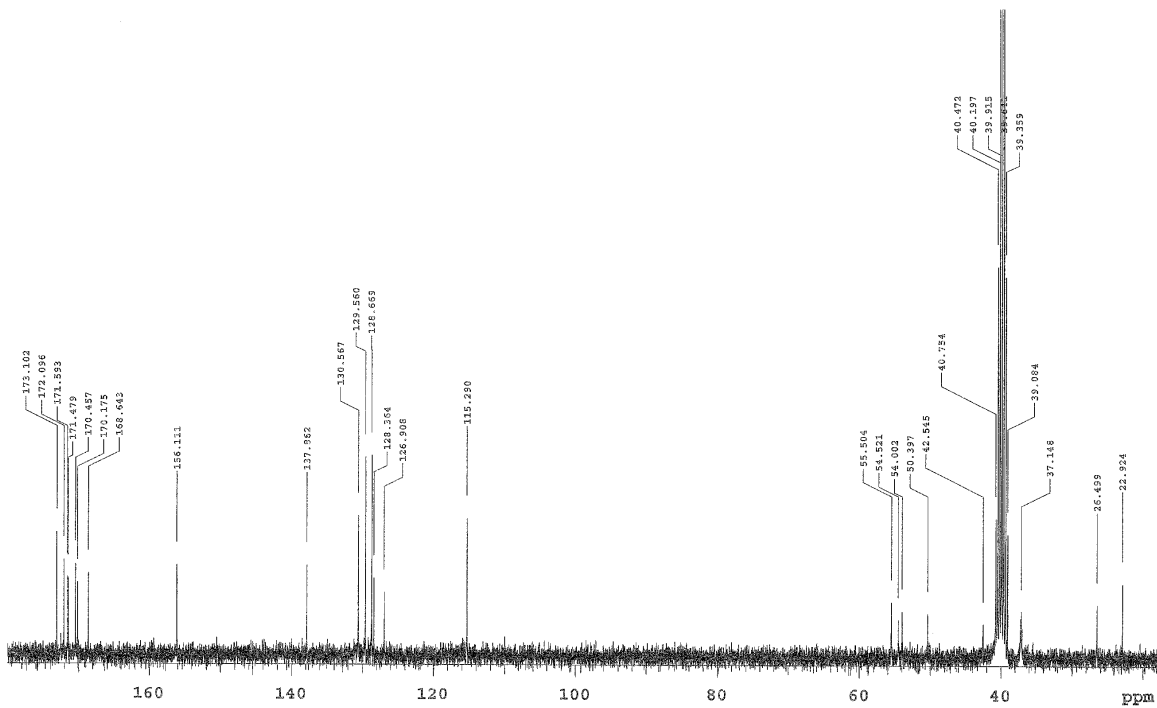

tr\_S\_Lug\_AIFil\_C13

Sample Name tr\_S\_Lug\_AIFil\_C13  
Date collected 2016-03-10

Pulse sequence CARBON  
Solvent dmsc

Temperature 25  
Spectrometer uwsm300.tva.edu.au-mercury300

Study owner nmr300  
nmr300

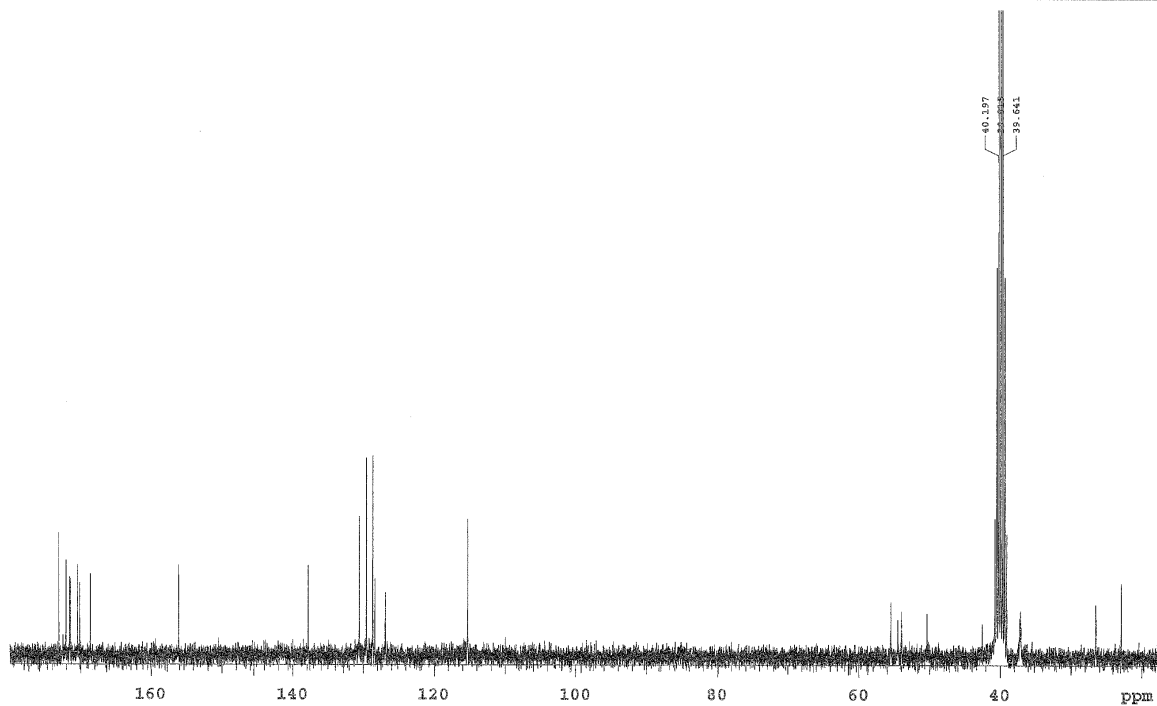

Data file /home/nmr300/nmr/sys/data/CcpData/tr\_S\_Lug\_AIFil\_C13.fid

Plot date 2016-03-05

**Compounds 12 & 3;** The linear sequence required for 12 was prepared using general procedure 2. The residual crude material was triturated with ice-cold ether ( $\times 3$ ) to furnish an off-white solid. MS (ESI<sup>+</sup>) for C<sub>37</sub>H<sub>54</sub>N<sub>5</sub>O<sub>9</sub>S; calculated 744.35, found, 744.55. RP-HPLC Onyx Monolithic C18 100  $\times$  4.6 mm, 10-100% B in 15 min,  $t_R$  10.28 min.

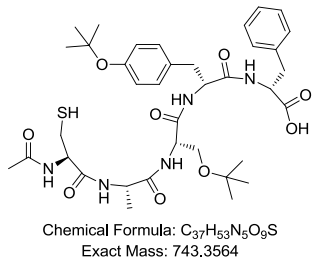

Data File C:\CHEM32\1\DATA\SAMPLES SENT TO IOWA 2015-11-26 10-00-46\061-0101.D  
Sample Name: S epi AIP I linear

```

=====
Acq. Operator   : SYSTEM                      Seq. Line :    1
Acq. Instrument : LC1260                     Location  : Vial 61
Injection Date  : 11/26/2015 10:02:13 AM      Inj       :    1
                                           Inj Volume: 20.000 µl
Method          : C:\CHEM32\1\DATA\SAMPLES SENT TO IOWA 2015-11-26 10-00-46\10 TO 100 OVER 15
                                           MINS 20UL.M (Sequence Method)
Last changed    : 11/26/2015 10:00:46 AM by SYSTEM
                                           (modified after loading) (Current integration events modified)
=====

```

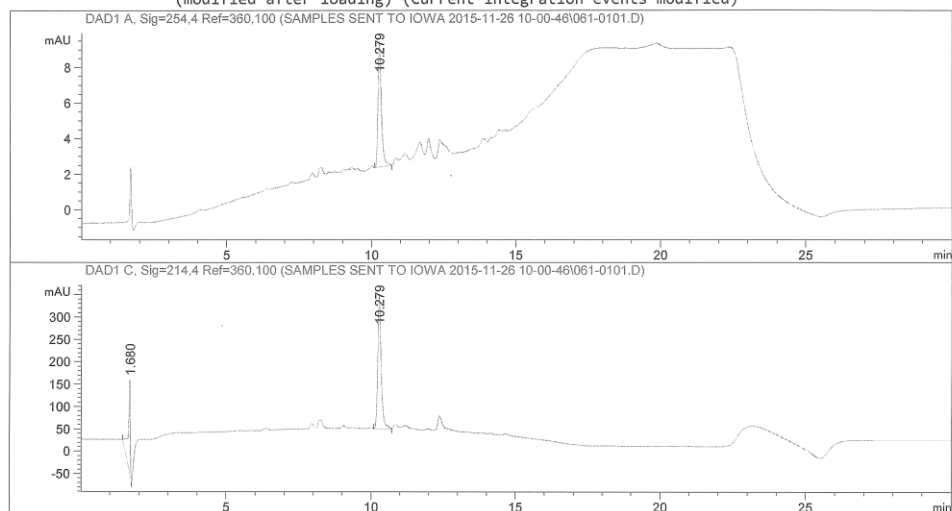

=====  
Fraction Information  
=====

No Fractions found.

=====  
Area Percent Report  
=====

```

Sorted By      :      Signal
Multiplier     :      1.0000
Dilution       :      1.0000
Use Multiplier & Dilution Factor with ISTDs

```

Signal 1: DAD1 A, Sig=254,4 Ref=360,100

| Peak # | RetTime [min] | Type | Width [min] | Area [mAU*s] | Height [mAU] | Area %   |
|--------|---------------|------|-------------|--------------|--------------|----------|
| 1      | 10.279        | BB   | 0.1253      | 58.45141     | 7.00503      | 100.0000 |

Totals : 58.45141 7.00503

20151209\_S\_epi\_AIP\_l\_linear 86 (0.296) Sm (SG, 2x0.50); Cm (65:87)

1: MS2 ES+  
2.87e7

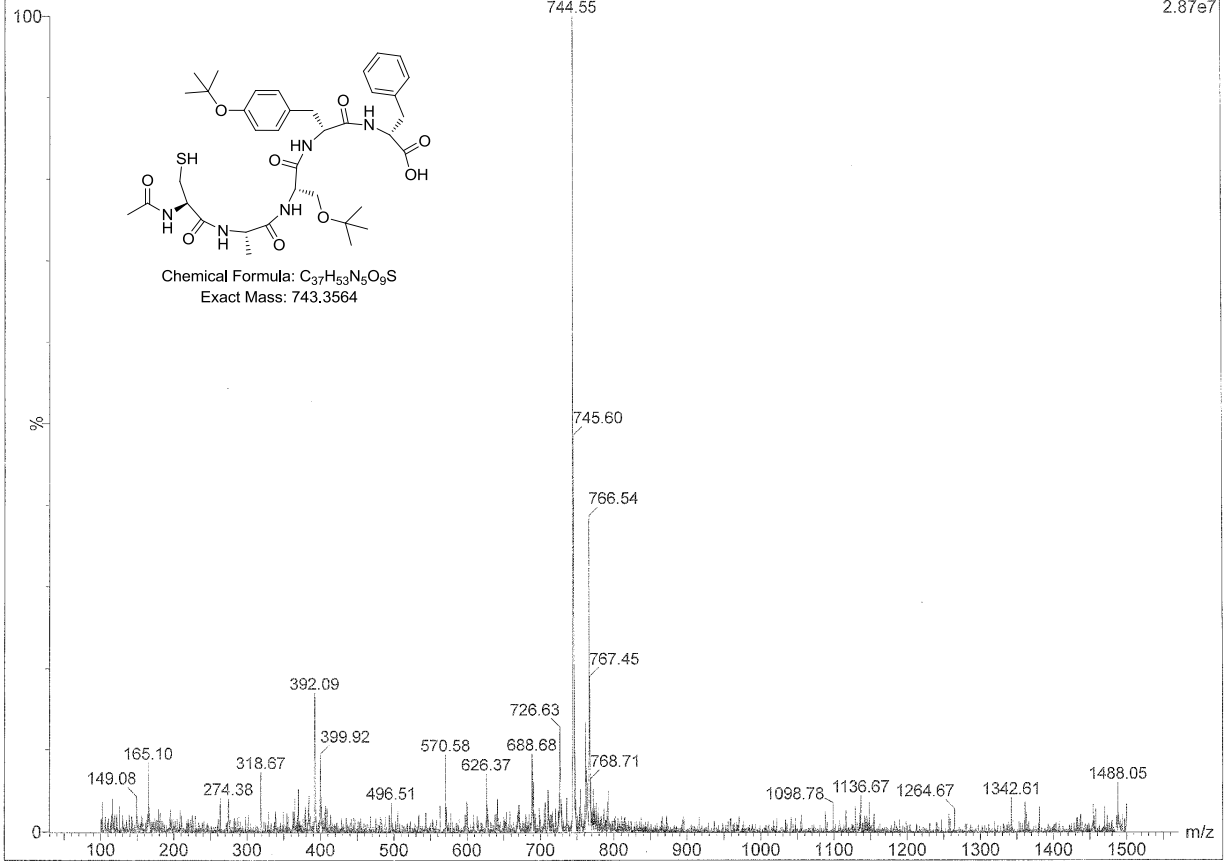

**Compound 12;** Compound 12 was synthesised utilizing general produce 3. The crude material was purified *via* semi-preparative RP-HPLC, and lyophilised to afford **12** (12 mg, 13.8 %). (*Note; 3 mg of this sample was collect for biological analysis*) MS (ESI<sup>+</sup>) for C<sub>37</sub>H<sub>52</sub>N<sub>5</sub>O<sub>8</sub>S, *m/z* 726.63 (M + 1, 100%); HRMS (ESI<sup>+</sup>) calculated 726.3458, found, 726.3455. RP-HPLC Onyx Monolithic C18 100 × 4.6 mm, 10-100% B in 15 min, *t*<sub>R</sub> 11.47 min.

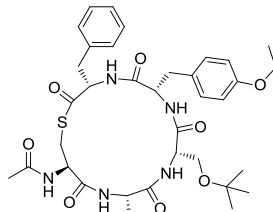

Chemical Formula: C<sub>37</sub>H<sub>51</sub>N<sub>5</sub>O<sub>8</sub>S  
Exact Mass: 725.3458

Data File C:\CHEM32\1\DATA\SAMPLES SENT TO IOWA 2015-11-26 10-00-46\062-0201.D  
Sample Name: Pro S epi AIP I cyclised

```

=====
Acq. Operator   : SYSTEM                      Seq. Line :    2
Acq. Instrument : LC1260                      Location  : Vial 62
Injection Date  : 11/26/2015 10:33:47 AM      Inj       :    1
                                           Inj Volume: 20.000 µl
Acq. Method     : C:\CHEM32\1\DATA\SAMPLES SENT TO IOWA 2015-11-26 10-00-46\10 TO 100 OVER 15
                                           MINS 20UL.M
Last changed    : 11/26/2015 10:00:46 AM by SYSTEM
Analysis Method : C:\CHEM32\1\DATA\SAMPLES SENT TO IOWA 2015-11-26 10-00-46\10 TO 100 OVER 15
                                           MINS 20UL.M (Sequence Method)
Last changed    : 12/1/2015 10:33:30 AM by SYSTEM
                                           (modified after loading) (Current integration events modified)
  
```

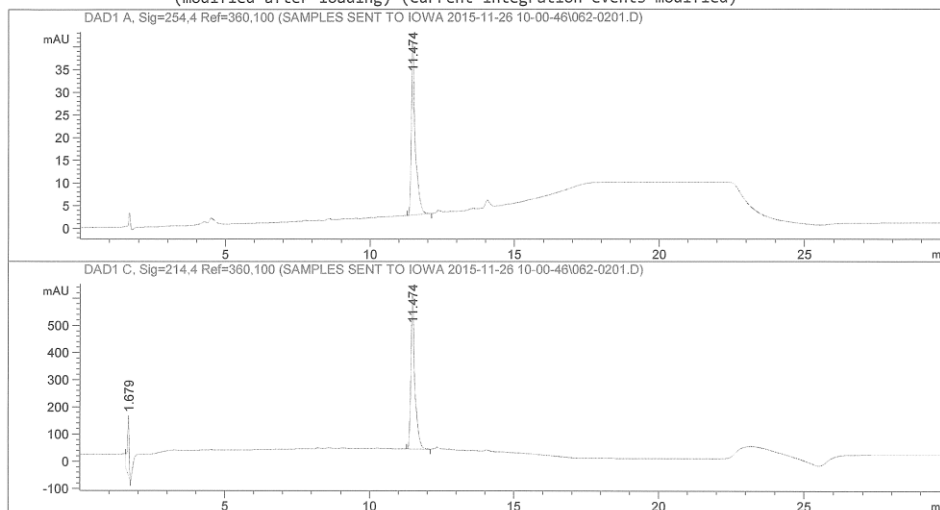

=====  
Fraction Information  
=====

No Fractions found.  
=====

=====  
Area Percent Report  
=====

```

Sorted By      : Signal
Multiplier     : 1.0000
Dilution       : 1.0000
Use Multiplier & Dilution Factor with ISTDs
  
```

20151209\_Pro\_S\_anti\_AIP\_187 (0.299) Cm (71:87)

1: MS2 ES+  
1.22e8

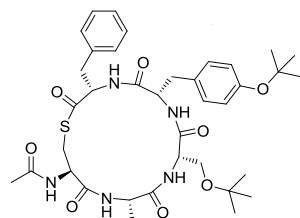

Chemical Formula:  $C_{37}H_{51}N_5O_8S$   
Exact Mass: 725.3458

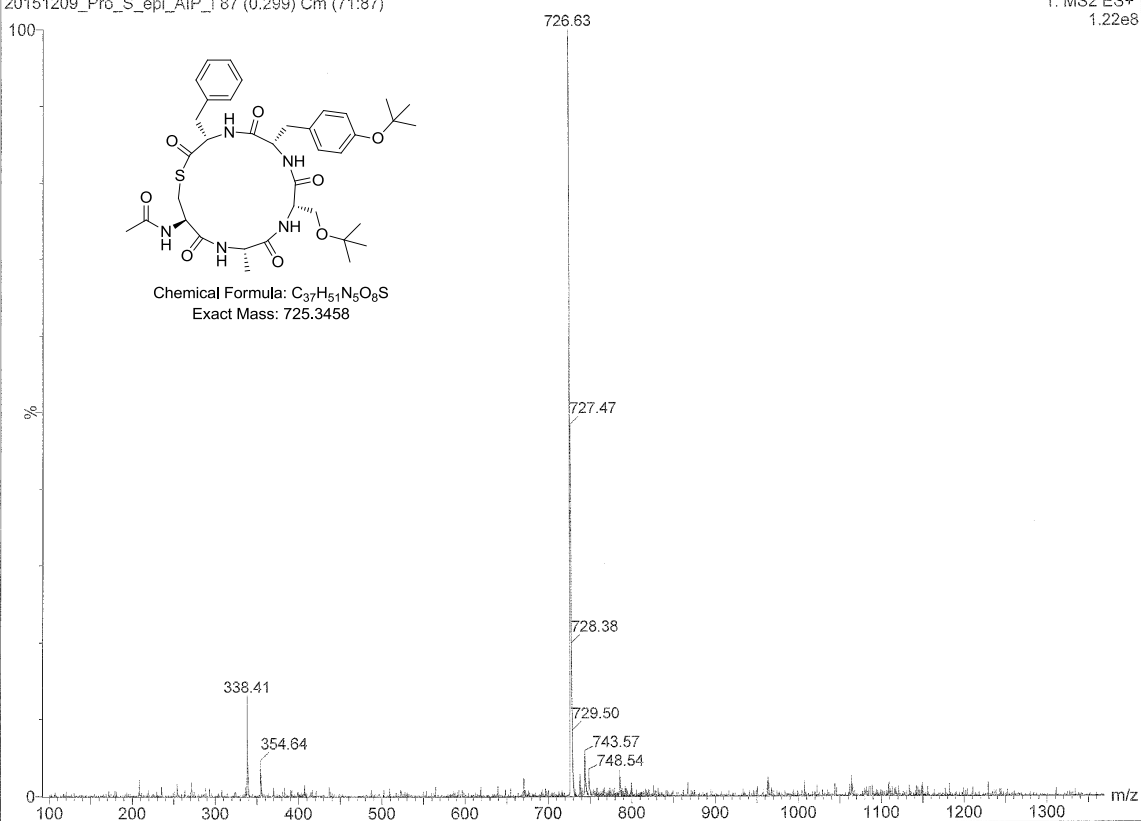



**Compound 3**; Compound **3** was prepared utilising general procedure 4 with **12**. The crude material was purified *via* semi-preparative RP-HPLC, and lyophilised to afford **3** (6.2 mg, 81.5 %). MS (ESI<sup>+</sup>) for C<sub>29</sub>H<sub>36</sub>N<sub>5</sub>O<sub>8</sub>S *m/z* 614.40; HRMS (ESI<sup>+</sup>) calculated 614.2206, found, 614.2231. RP-HPLC Onyx Monolithic C18 100 × 4.6 mm, 10-100% B in 15 min, *t*<sub>R</sub> 6.82 min. <sup>1</sup>H NMR (300 MHz, DMSO) δ 9.13 (s, 1H), 8.23 (d, *J* = 7.8 Hz, 1H), 8.15 (d, *J* = 7.1 Hz, 1H), 8.07 (d, *J* = 7.9 Hz, 1H), 7.82 (d, *J* = 7.7 Hz, 1H), 7.73 (d, *J* = 8.2 Hz, 1H), 7.29 – 7.17 (m, 5H), 6.95 (d, *J* = 8.5 Hz, 2H), 6.58 (d, *J* = 8.5 Hz, 2H), 4.45 – 4.30 (m, 3H), 4.30 – 4.16 (m, 2H), 3.05 (d, *J* = 5.5 Hz, 1H), 3.00 (d, *J* = 5.4 Hz, 1H), 2.93 – 2.81 (m, 3H), 2.80 – 2.53 (m, 4H), 2.32 (t, *J* = 8.4 Hz, 1H), 1.85 (s, 3H), 1.16 (d, *J* = 7.1 Hz, 3H). <sup>13</sup>C NMR (75 MHz, DMSO) δ 173.05, 172.52, 171.26, 170.12, 170.00, 169.88, 156.14, 137.79, 130.57, 129.53, 128.66, 127.93, 126.90, 115.23, 62.12, 55.40, 54.31, 54.03, 48.77, 37.20, 36.89, 26.62, 22.92, 18.35.

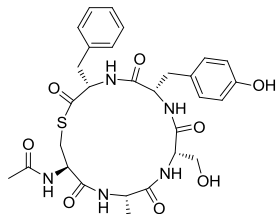

Chemical Formula: C<sub>29</sub>H<sub>35</sub>N<sub>5</sub>O<sub>8</sub>S  
Exact Mass: 613.2206

```
Data File C:\CHEM32\1\DATA\TR S EPI AIP I 6_8 MIN 2015-12-15 16-19-36\082-0101.D
Sample Name: Tr S epi AIP I 6.8 mins
=====
Acq. Operator   : Simil20102015           Seq. Line :    1
Acq. Instrument : LC1260                 Location  : Vial 82
Injection Date  : 12/15/2015 4:21:23 PM      Inj       :    1
                                           Inj Volume: 100.000 µl
Acq. Method    : C:\CHEM32\1\DATA\TR S EPI AIP I 6_8 MIN 2015-12-15 16-19-36\10 TO 100
                                           OV 15MIN 100UL.M
Last changed   : 12/10/2015 4:12:03 PM by Simil20102015
Analysis Method : C:\CHEM32\1\METHODS\10 TO 100 OV 15MIN 100UL.M
Last changed   : 12/15/2015 5:24:52 PM by Simil20102015
                                           (modified after loading) (Current integration events modified)
=====
```

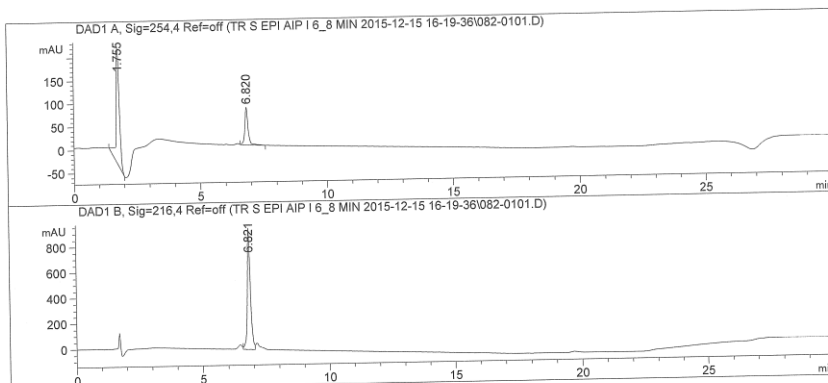

=====  
Area Percent Report  
=====

Sorted By : Signal  
Multiplier: : 1.0000  
Dilution: : 1.0000  
Use Multiplier & Dilution Factor with ISTDs

Signal 1: DAD1 A, Sig=254,4 Ref=off

| Peak #   | RetTime [min] | Type | Width [min] | Area [mAU*s] | Height [mAU] | Area %  |
|----------|---------------|------|-------------|--------------|--------------|---------|
| 1        | 1.755         | BB   | 0.1350      | 2235.54028   | 253.18295    | 75.1678 |
| 2        | 6.820         | VB   | 0.1317      | 738.52789    | 81.55083     | 24.8322 |
| Totals : |               |      |             | 2974.06818   | 334.73378    |         |

Signal 2: DAD1 B, Sig=216,4 Ref=off

| Peak # | RetTime [min] | Type | Width [min] | Area [mAU*s] | Height [mAU] | Area %   |
|--------|---------------|------|-------------|--------------|--------------|----------|
| 1      | 6.821         | VV   | 0.1260      | 8081.33545   | 943.21979    | 100.0000 |

20151209\_Tr\_S\_epi\_AIP\_I\_A\_Final 102 (0.351) Sm (SG, 2x0.50); Cm (63:106)

1: MS2 ES+  
4.99e7

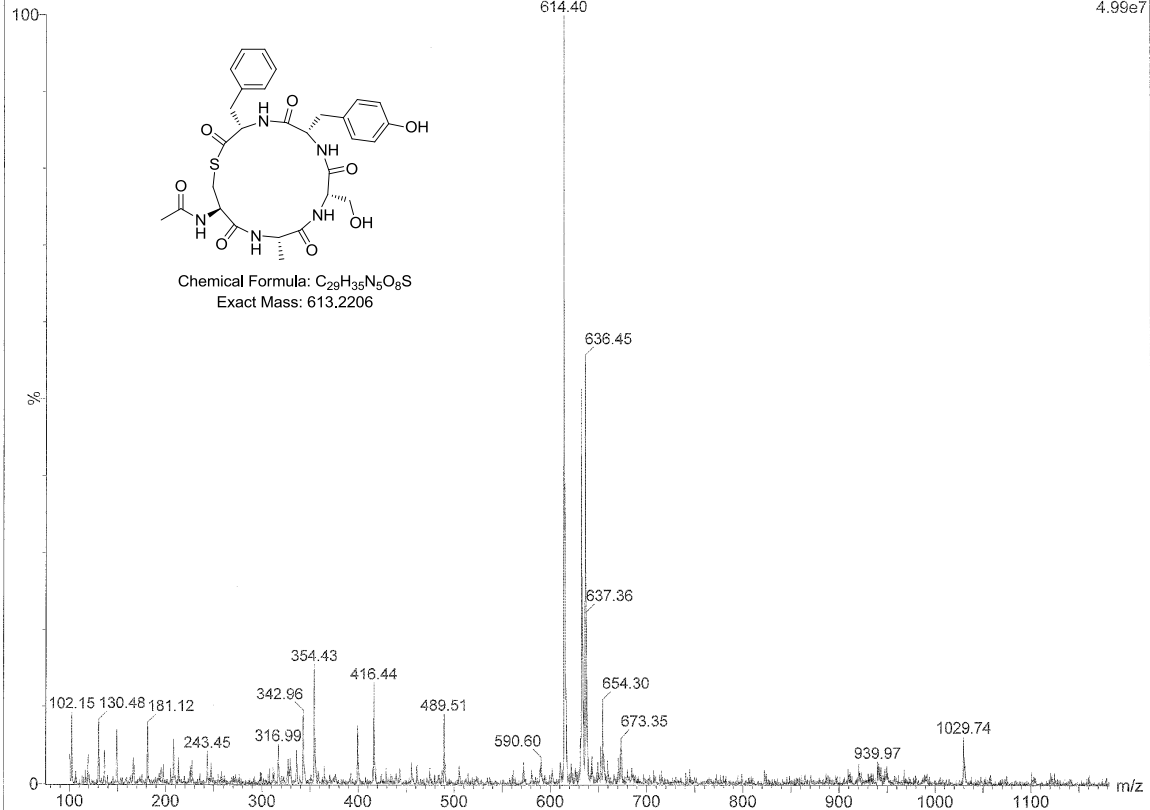

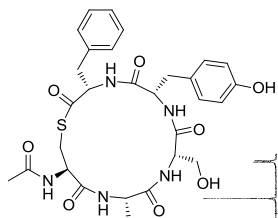

Chemical Formula: C<sub>29</sub>H<sub>35</sub>N<sub>6</sub>O<sub>8</sub>S  
Exact Mass: 613.2206

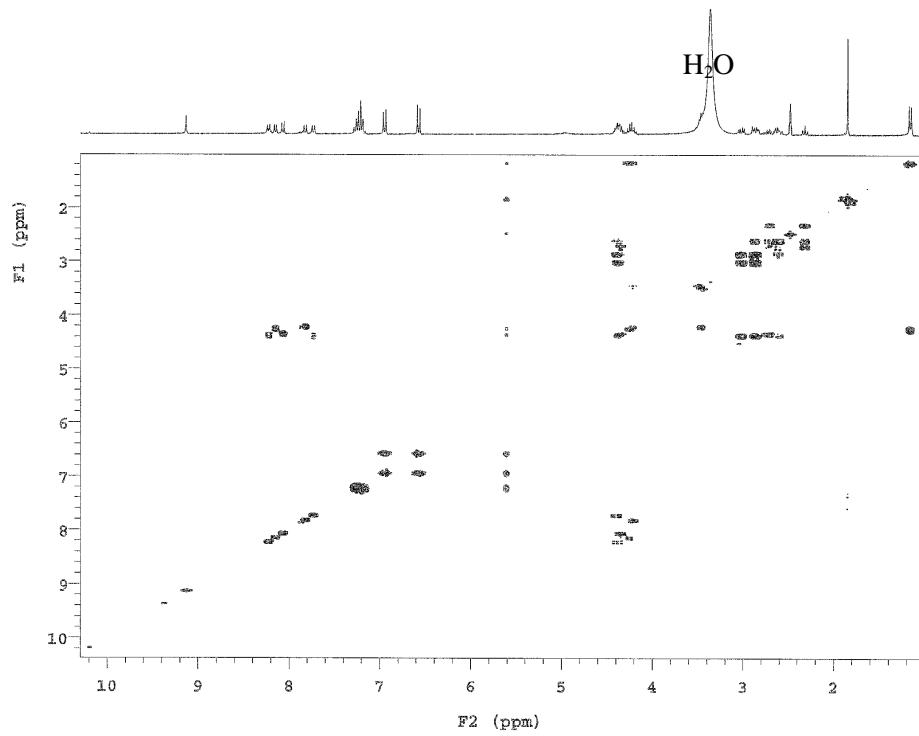



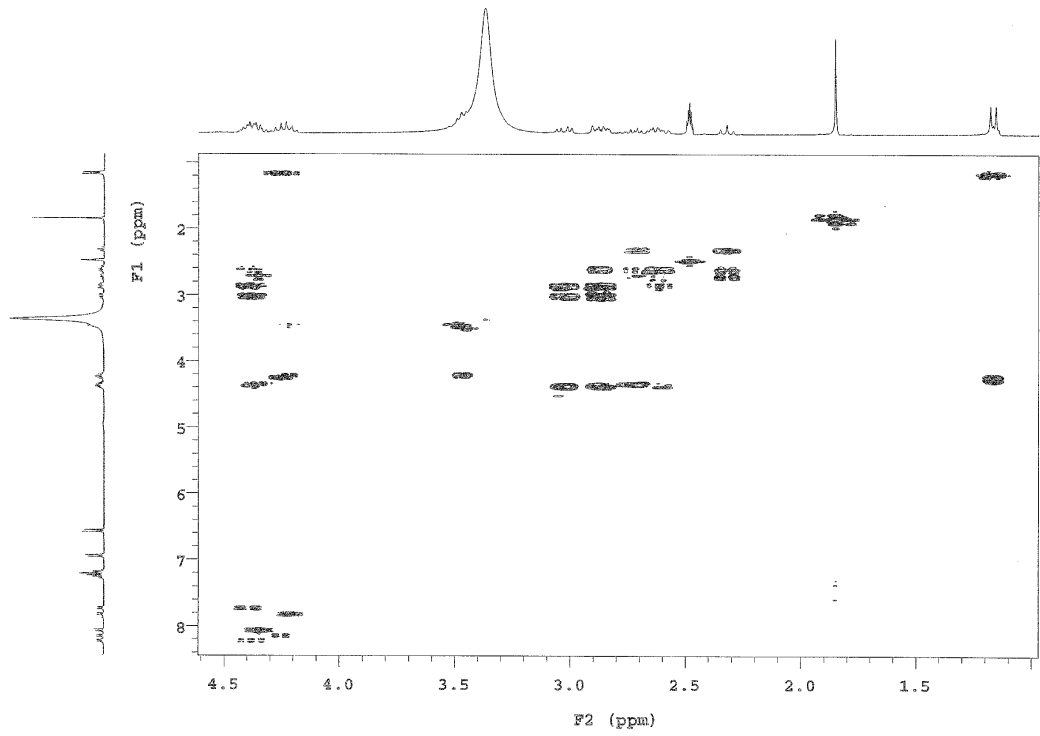

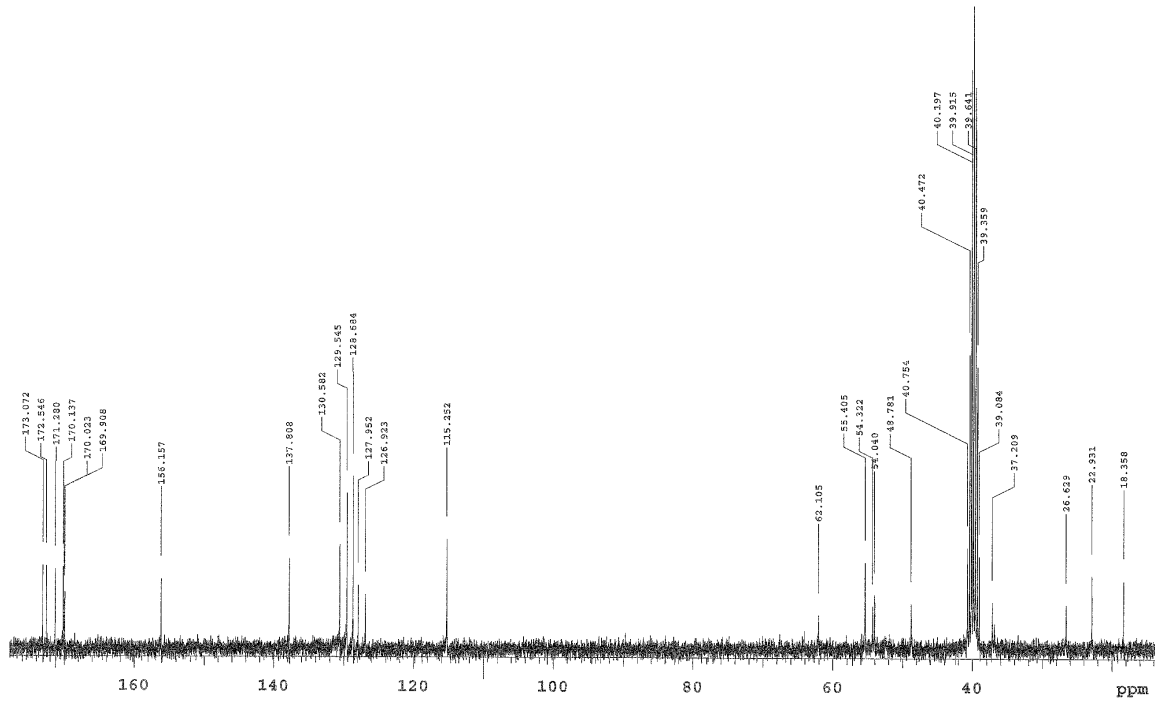

Data file #kxna/nmr300/kmmya/data/CpgData/N\_Ac\_Tr\_S\_epi\_AIP\_1\_C13.fid

Plot date 2016-04-05

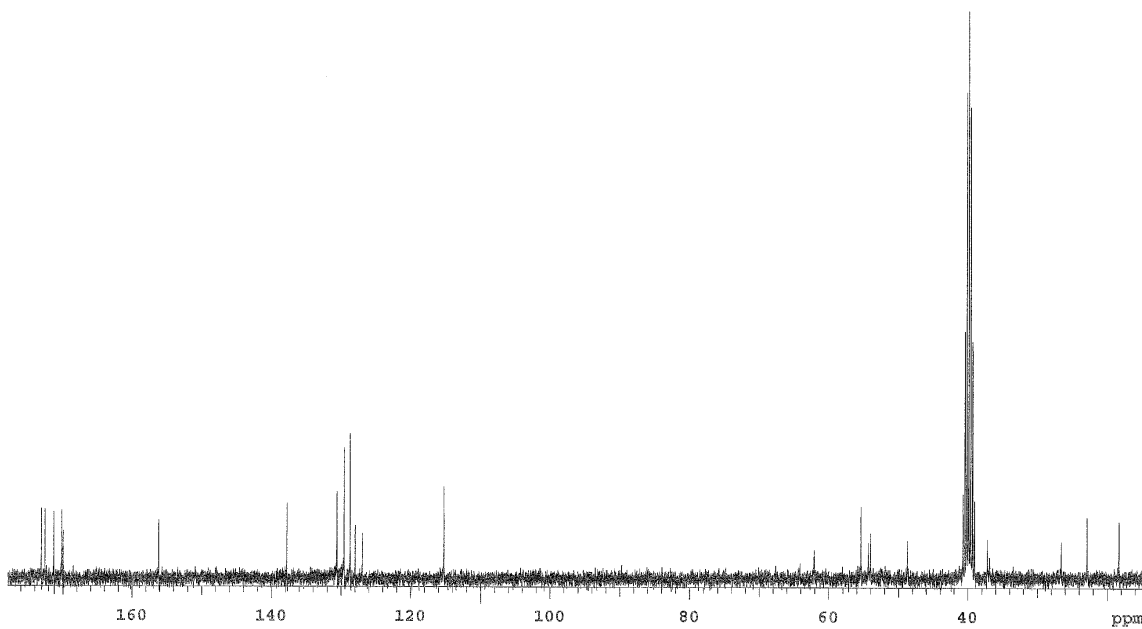

**Compounds 13 & 4;** The linear sequence required for **13** was prepared using general procedure 2. The residual crude material

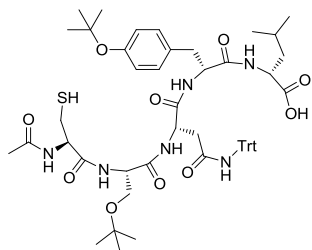

was triturated with ice-cold ether ( $\times 3$ ) to furnish an off-white solid. MS (ESI<sup>+</sup>) for C<sub>54</sub>H<sub>71</sub>N<sub>6</sub>O<sub>10</sub>S; calculated 995.49, found, 995.71. RP-HPLC Onyx Monolithic C18 100  $\times$  4.6 mm, 10-100% B in 15 min,  $t_R$  13.91 min.

Chemical Formula: C<sub>54</sub>H<sub>70</sub>N<sub>6</sub>O<sub>10</sub>S  
Exact Mass: 994.4874

Data File C:\CHEM32\1\DATA\SAMPLES SENT TO IOWA 2015-11-26 10-00-46\065-0501.D  
Sample Name: S epi AIP II linear

```

=====
Acq. Operator   : SYSTEM                      Seq. Line :    5
Acq. Instrument : LC1260                      Location  : Vial 65
Injection Date  : 11/26/2015 12:08:28 PM      Inj       :    1
                                           Inj Volume: 20.000 µl
Acq. Method     : C:\CHEM32\1\DATA\SAMPLES SENT TO IOWA 2015-11-26 10-00-46\10 TO 100 OVER 15
                                           MINS 20UL.M
Last changed    : 11/26/2015 10:00:46 AM by SYSTEM
Analysis Method : C:\CHEM32\1\DATA\SAMPLES SENT TO IOWA 2015-11-26 10-00-46\10 TO 100 OVER 15
                                           MINS 20UL.M (Sequence Method)
Last changed    : 12/1/2015 10:35:17 AM by SYSTEM
                 (modified after loading) (Current integration events modified)
    
```

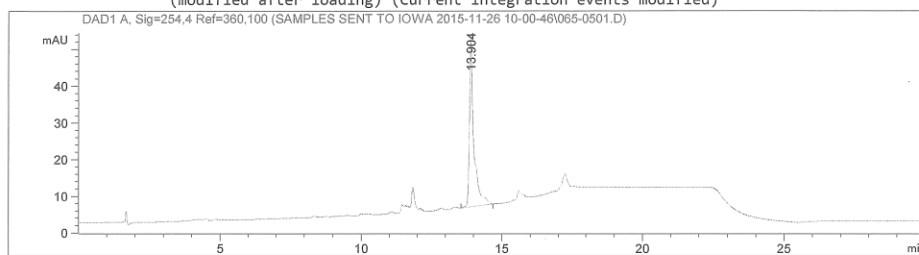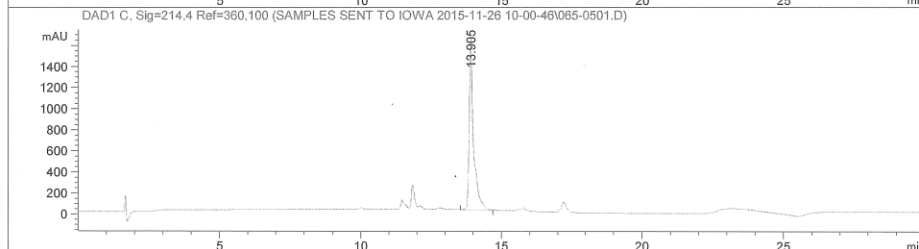

```

=====
Fraction Information
=====
No Fractions found.
=====
    
```

```

=====
Area Percent Report
=====
Sorted By      : Signal
Multiplier     : 1.0000
Dilution       : 1.0000
Use Multiplier & Dilution Factor with ISTDs
    
```



20151209\_Tr\_S\_epi\_AIP\_II\_linear 81 (0.278) Sm (SG, 2x0.50); Cm (56:83)

1: MS2 ES+  
7.80e7

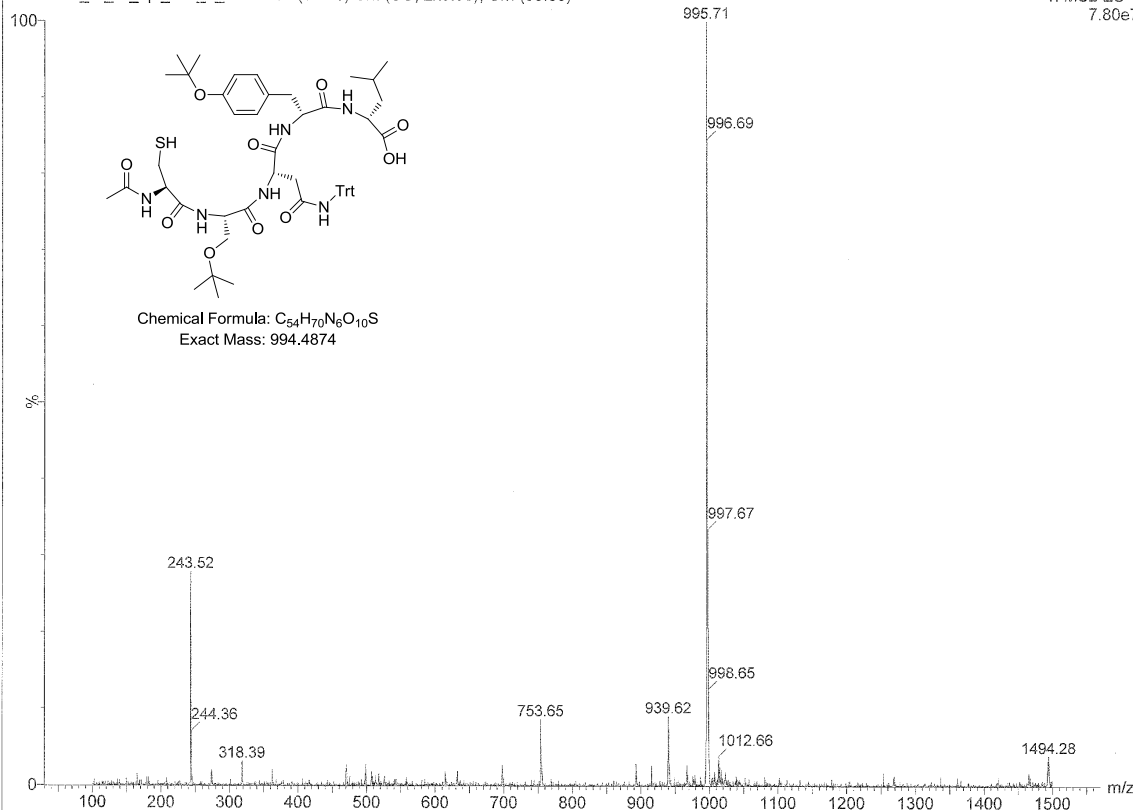

**Compound 13**; Compound **13** was synthesized utilizing general produce 3. The crude material was purified *via* semi-preparative RP-HPLC, and lyophilised to afford **13** (13 mg, 10.9 %). (*Note*; 3 mg of this sample was collect for biological analysis) MS (ESI<sup>+</sup>) for C<sub>54</sub>H<sub>69</sub>N<sub>6</sub>O<sub>9</sub>S, *m/z* 977.71 (M + 1, 100%); HRMS (ESI<sup>+</sup>) calculated 977.4768, found, 977.4719. RP-HPLC Onyx Monolithic C18 100 × 4.6 mm, 10-100% B in 15 min, *t<sub>R</sub>* 15.38 min.

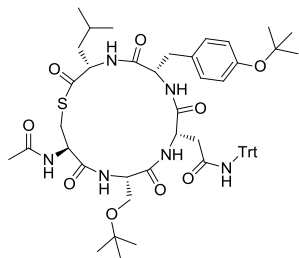

Chemical Formula: C<sub>54</sub>H<sub>68</sub>N<sub>6</sub>O<sub>9</sub>S  
Exact Mass: 976.4768

Data File C:\CHEM32\1\DATA\SAMPLES SENT TO IOWA 2015-11-26 10-00-46\066-0601.D  
Sample Name: Pro S epi AIP II cyclised

```

=====
Acq. Operator   : SYSTEM                      Seq. Line :    6
Acq. Instrument : LC1260                      Location  : Vial 66
Injection Date  : 11/26/2015 12:39:59 PM      Inj       :    1
                                           Inj Volume: 20.000 µl
Acq. Method     : C:\CHEM32\1\DATA\SAMPLES SENT TO IOWA 2015-11-26 10-00-46\10 TO 100 OVER 15
                                           MINS 20UL.M
Last changed    : 11/26/2015 10:00:46 AM by SYSTEM
Analysis Method : C:\CHEM32\1\DATA\SAMPLES SENT TO IOWA 2015-11-26 10-00-46\10 TO 100 OVER 15
                                           MINS 20UL.M (Sequence Method)
Last changed    : 12/1/2015 10:36:05 AM by SYSTEM
                (modified after loading) (Current integration events modified)
    
```

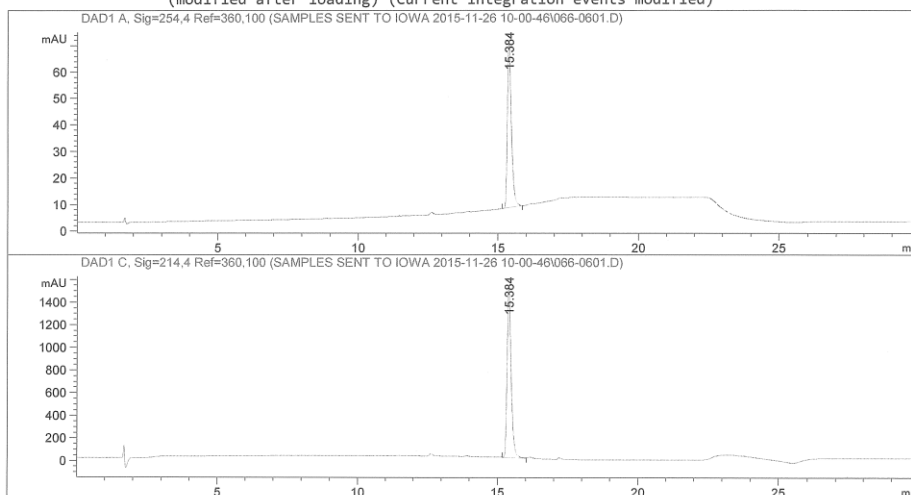

```

=====
                          Fraction Information
=====
No Fractions found.
=====
                          Area Percent Report
=====
    
```

```

Sorted By      :      Signal
Multiplier     :      1.0000
Dilution       :      1.0000
Use Multiplier & Dilution Factor with ISTDs
    
```

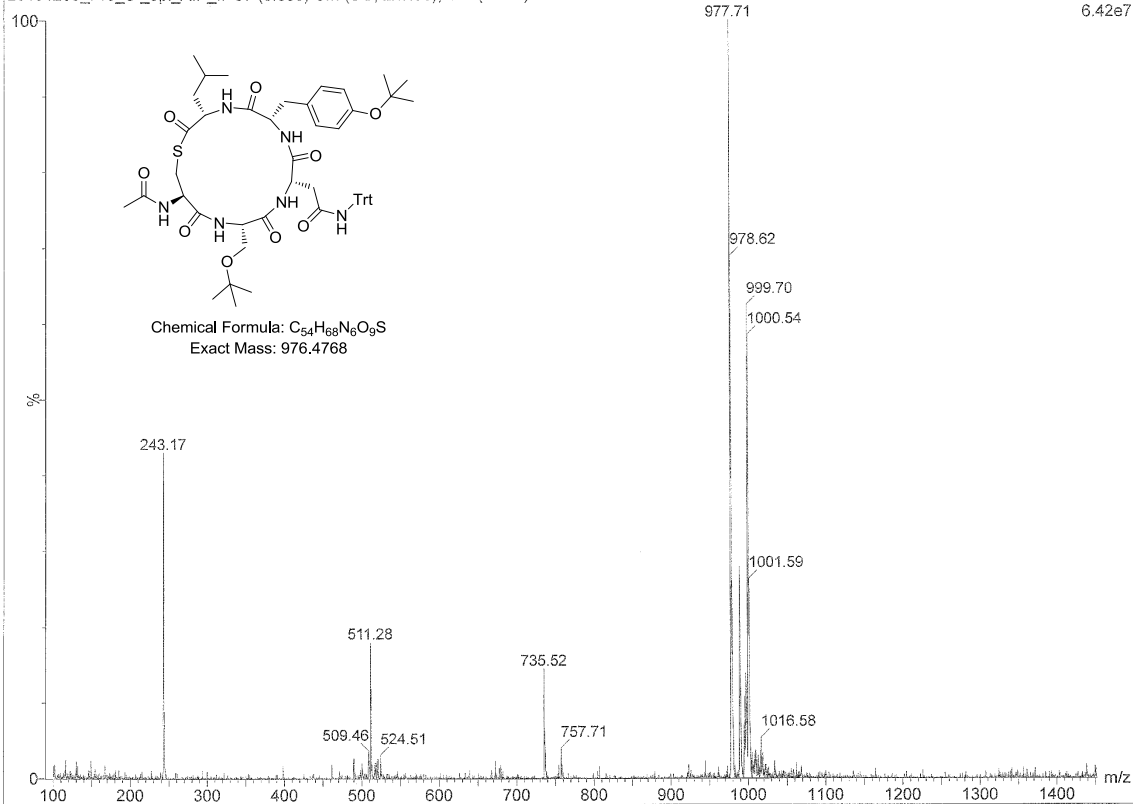

**Compound 4**; Compound **4** was prepared utilising general procedure 4 with **13**. The crude material was purified *via* semi-

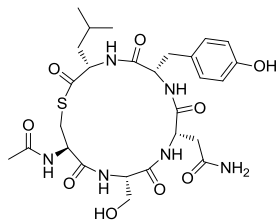

Chemical Formula: C<sub>27</sub>H<sub>39</sub>N<sub>6</sub>O<sub>9</sub>S  
Exact Mass: 622.2421

preparative RP-HPLC, and lyophilised to afford **4** (4.7 mg, 75.1 %). MS (ESI<sup>+</sup>) for C<sub>27</sub>H<sub>39</sub>N<sub>6</sub>O<sub>9</sub>S, *m/z* 623.3 (M + 1, 100%); HRMS (ESI<sup>+</sup>) calculated 623.2421, found, 623.2425. RP-HPLC Onyx Monolithic C18 100 × 4.6 mm, 10-100% B in 15 min, *t<sub>R</sub>* 7.08 min. <sup>1</sup>H NMR (300 MHz, DMSO ) δ 9.16 (s, 1H), 8.10 (d, *J* = 8.0 Hz, 2H), 8.06 (d, *J* = 7.4 Hz, 1H), 8.01 (d, *J* = 7.8 Hz, 1H), 7.81 (d, *J* = 8.3 Hz, 1H), 7.33 (s, 1H), 6.98 (d, *J* = 8.5 Hz, 2H), 6.89 (s, 1H), 6.61 (d, *J* = 8.5 Hz, 2H), 4.51 – 4.30 (m, 3H), 4.26 (dd, *J* = 13.2, 6.0 Hz, 1H), 4.20 – 4.09 (m, 1H), 3.65 – 3.50 (m, 4H), 2.92 (dd, *J* = 14.2, 3.9 Hz, 1H), 2.79 (d, *J* = 5.3 Hz, 1H), 2.75 (d, *J* = 5.2 Hz, 1H), 2.69 – 2.56 (m, 2H), 2.44 (d, *J* = 5.4 Hz, 1H), 2.35 (d, *J* = 7.5 Hz, 1H), 2.30 (d, *J* = 7.3 Hz, 1H), 1.85 (d, *J* = 7.0 Hz, 3H), 1.67 – 1.40 (m, 3H), 0.87 (d, *J* = 6.3 Hz, 2H), 0.82 (d, *J* = 6.3 Hz, 3H). <sup>13</sup>C NMR (75 MHz, DMSO ) δ 174.29, 172.96, 172.88, 172.03, 171.29, 170.85, 170.56, 170.26, 170.09, 156.13, 130.51, 128.24, 128.20, 115.34, 115.34, 62.04, 55.49, 53.24, 53.02, 50.84, 50.34, 32.85, 26.62, 26.61, 24.64, 23.30, 22.92, 21.82.

Data File C:\CHEM32\1\DATA\SAMPLES SENT TO IOWA 2015-11-26 10-00-46\064-0401.D  
Sample Name: Tr S epi AIP I 8.5 min

```

=====
Acq. Operator   : SYSTEM                      Seq. Line :    4
Acq. Instrument : LC1260                     Location  : Vial 64
Injection Date  : 11/26/2015 11:36:54 AM      Inj       :    1
                                           Inj Volume: 20.000 µl
Acq. Method     : C:\CHEM32\1\DATA\SAMPLES SENT TO IOWA 2015-11-26 10-00-46\10 TO 100 OVER 15
                                           MINS 20UL.M
Last changed    : 11/26/2015 10:00:46 AM by SYSTEM
Analysis Method : C:\CHEM32\1\DATA\SAMPLES SENT TO IOWA 2015-11-26 10-00-46\10 TO 100 OVER 15
                                           MINS 20UL.M (Sequence Method)
Last changed    : 12/1/2015 10:34:30 AM by SYSTEM
                                           (modified after loading) (Current integration events modified)
=====

```

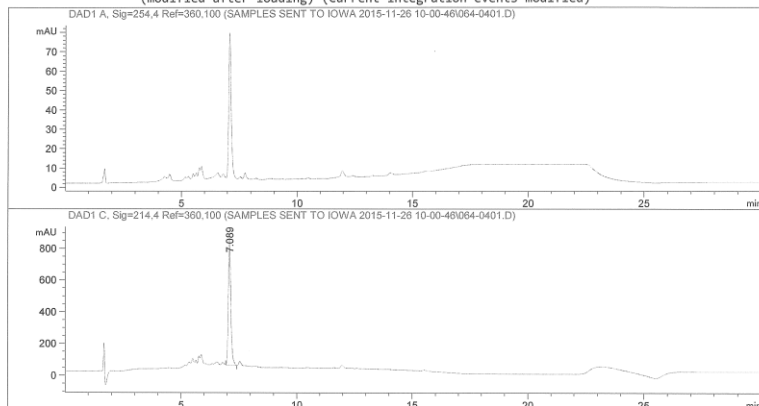

```

=====
Fraction Information
=====
No Fractions found.
=====
Area Percent Report
=====
Sorted By      :      Signal
Multiplier     :      1.0000
Dilution       :      1.0000
Use Multiplier & Dilution Factor with ISTDs
=====

```

From vial

20150909\_ChrisGordon\_SepiAlPII 90 (0.309) Sm (SG, 2x0.50); Cm (71:90)

1: MS2 ES+  
3.18e7

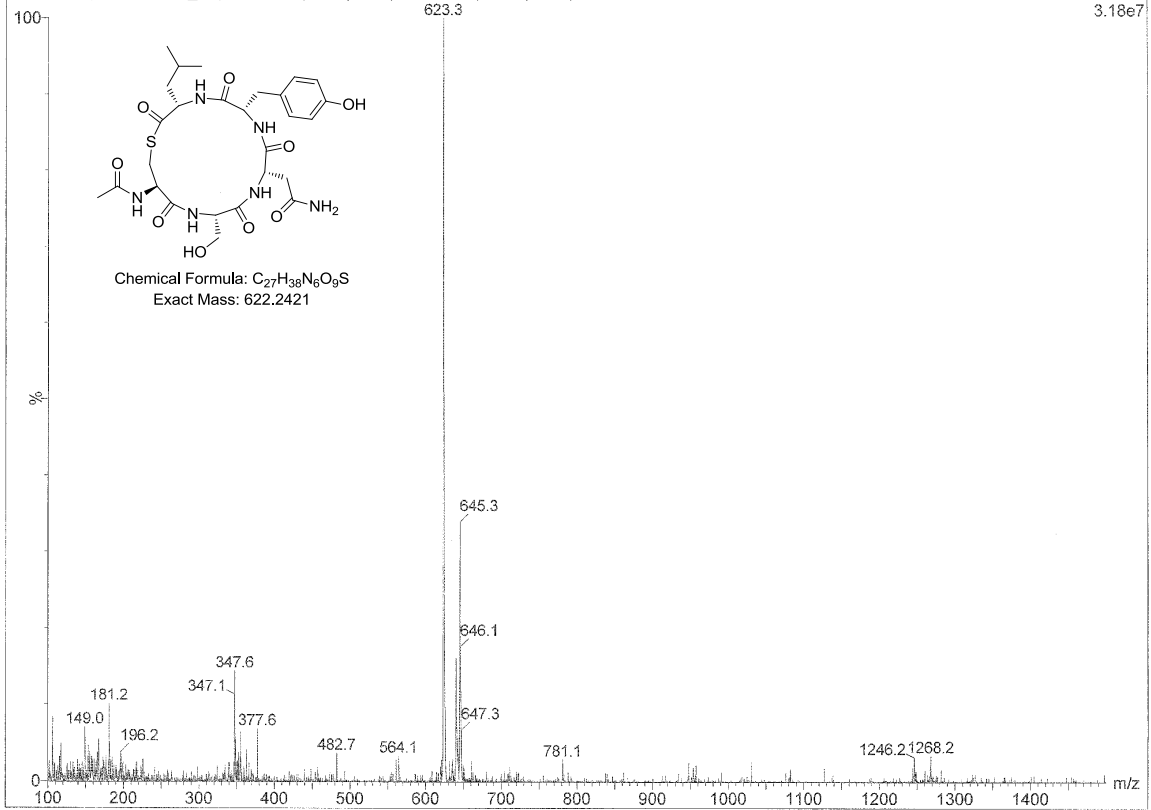

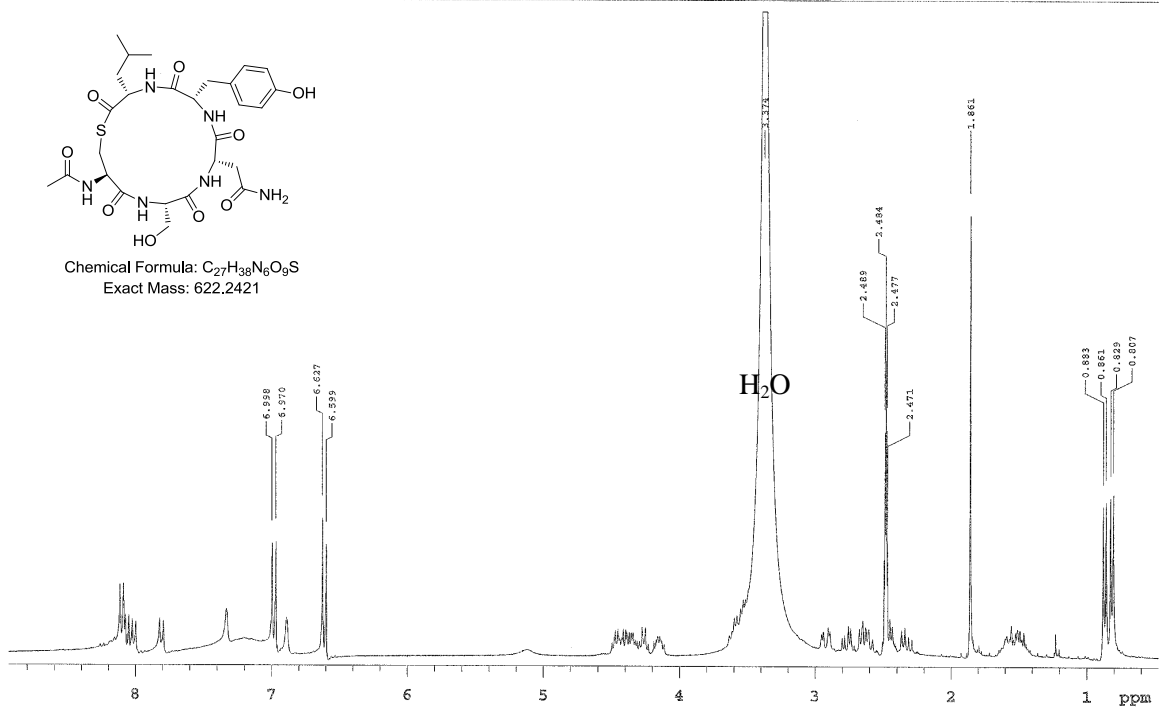

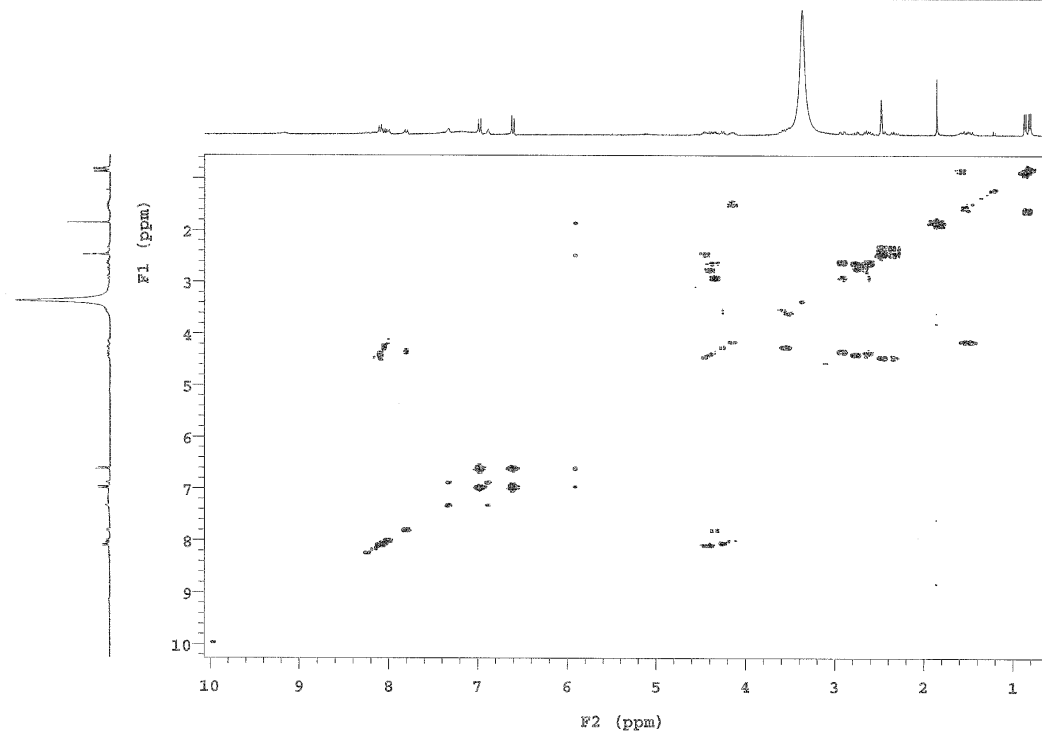

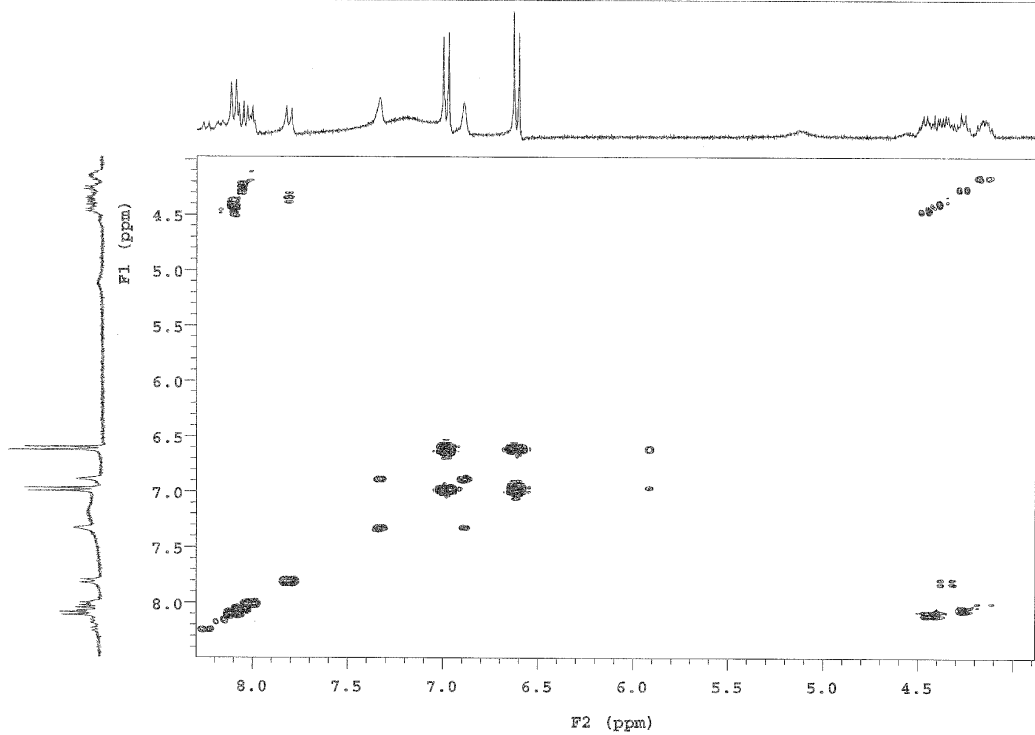



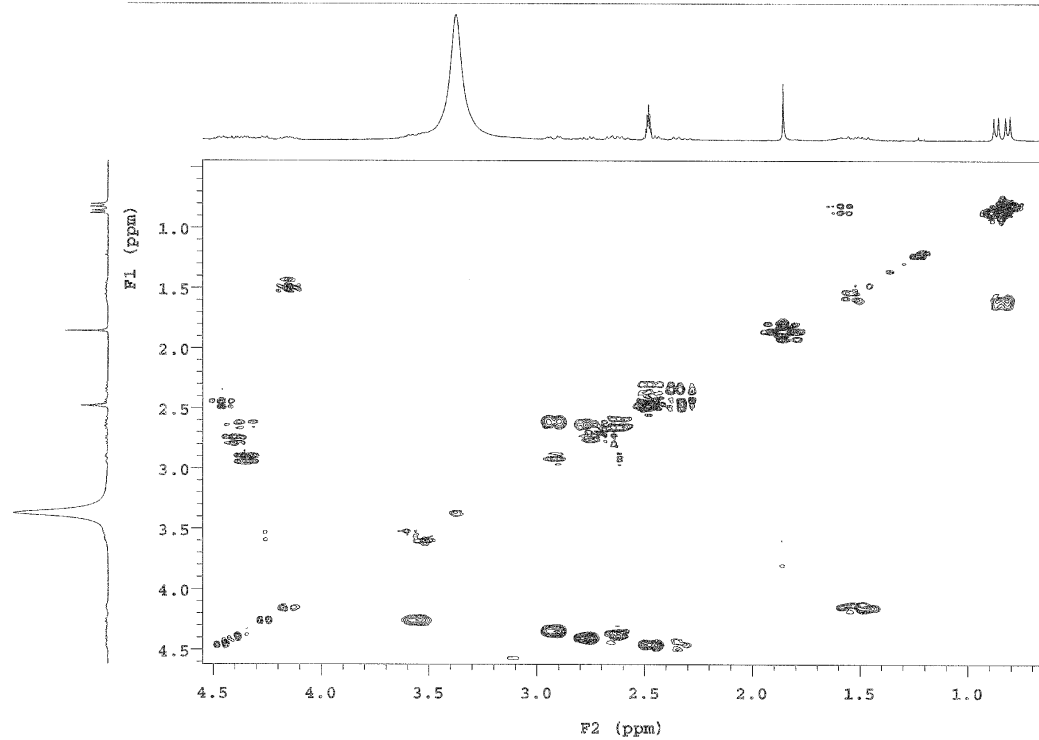

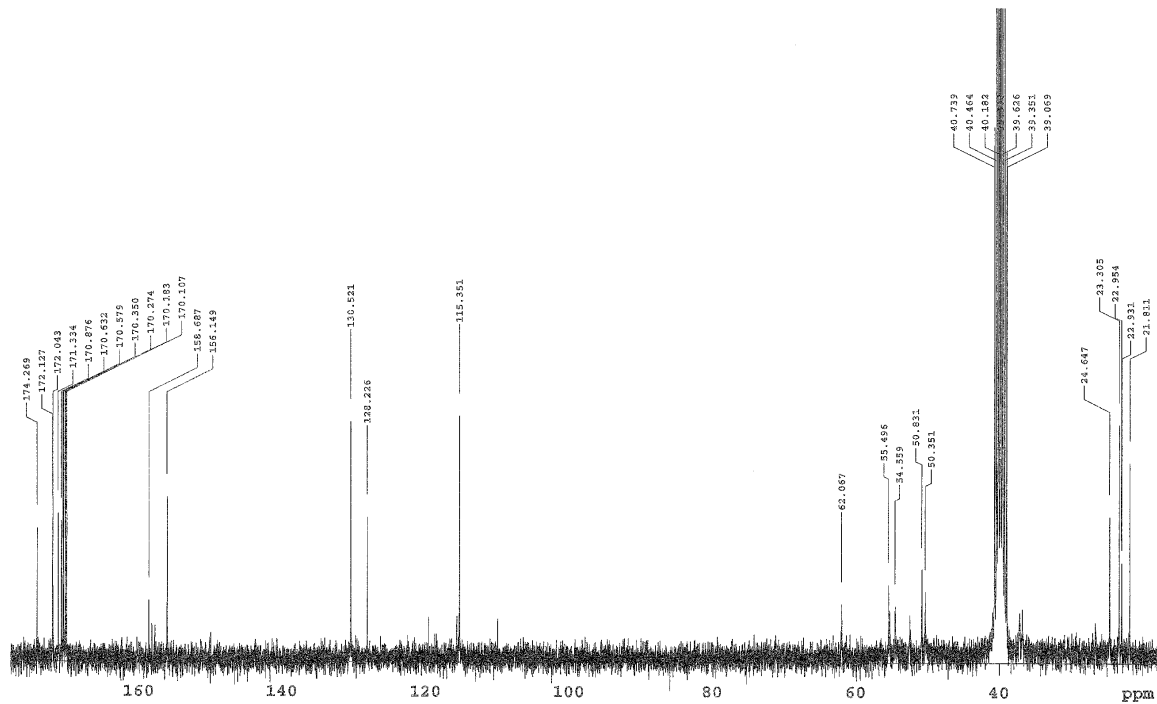

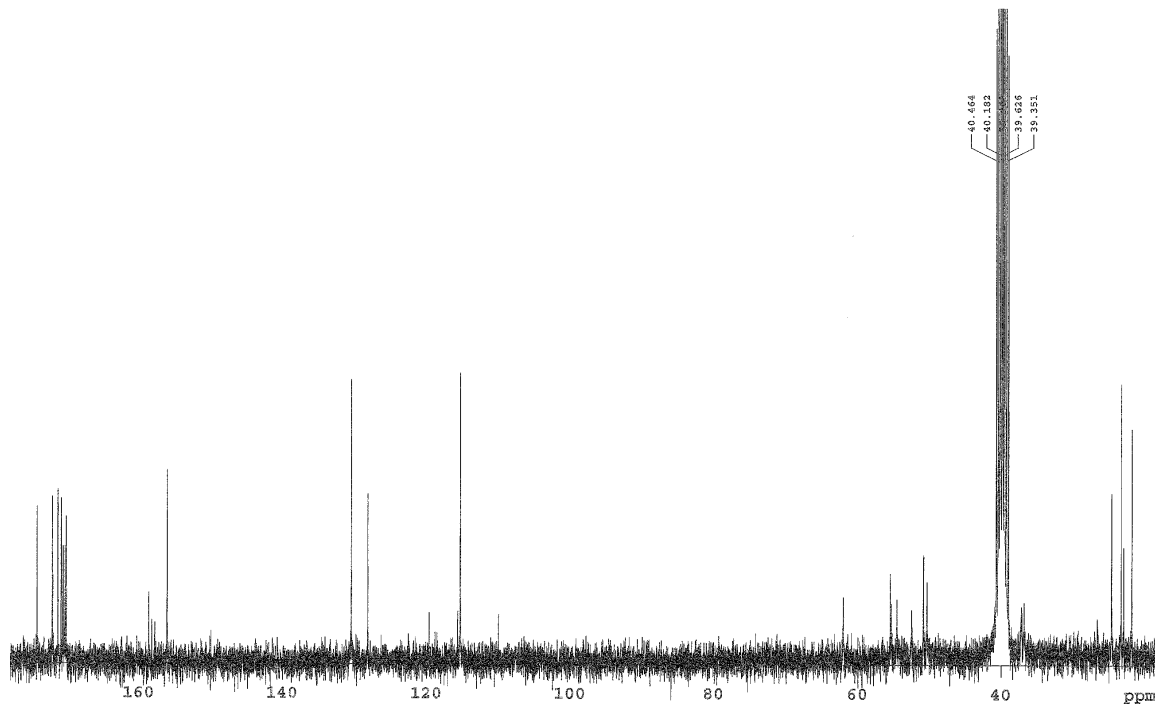



20151209\_Tr\_S\_epi\_AIP\_III\_linear 94 (0.323) Sm (SG, 2x0.50); Cm (53;94)

1: MS2 ES+  
2.49e7

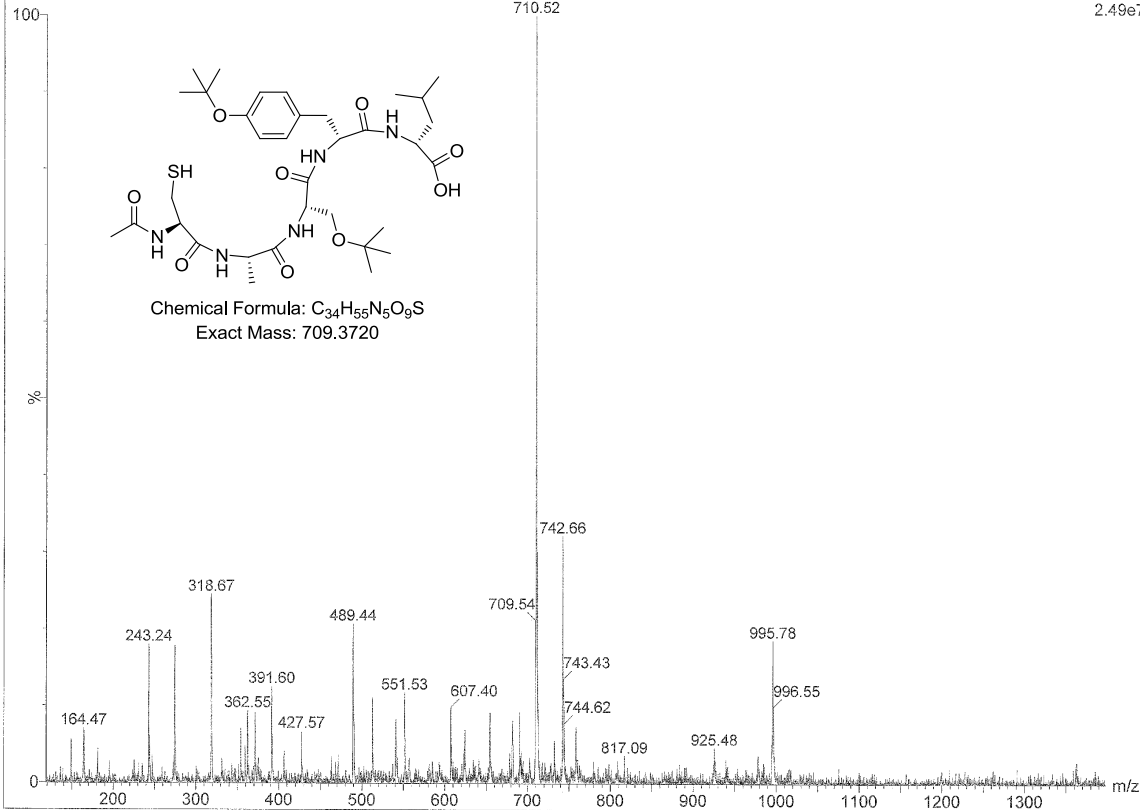

**Compound 14;** Compound 14 was synthesised utilising general produce 3. The crude material was purified *via* semi-preparative RP-HPLC, and lyophilised to afford **14** (16 mg, 18.8 %). (*Note; 3 mg of this sample was collect for biological analysis*) MS (ESI<sup>+</sup>) for C<sub>34</sub>H<sub>54</sub>N<sub>5</sub>O<sub>8</sub>S *m/z* 692.46 (M + 1, 100%); HRMS (ESI<sup>+</sup>) calculated 692.3615, found, 692.3620. RP-HPLC Onyx Monolithic C18 100 × 4.6 mm, 10-100% B in 15 min, *t<sub>R</sub>* 11.43 min.

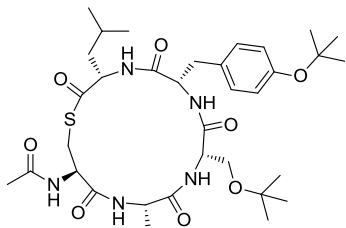

Chemical Formula: C<sub>34</sub>H<sub>53</sub>N<sub>5</sub>O<sub>8</sub>S  
Exact Mass: 691.3615

Data File D:\2014\CH...ATA\DDCOPPERCOMPOUNDS\EPI AIP IIIS 2015-11-11 09-46-50\062-0201.D  
Sample Name: S epi AIP III cyclised crude

```

=====
Acq. Operator   : SYSTEM                      Seq. Line :    2
Acq. Instrument : LC1260                      Location  : Vial 62
Injection Date  : 11/11/2015 10:19:37 AM      Inj       :    1
                                           Inj Volume: 10.000 µl
Acq. Method    : D:\2014\CHRIS\DATA\DDCOPPERCOMPOUNDS\EPI AIP IIIS 2015-11-11 09-46-50\10
                                           TO 100 OVER 15 MINS 10UL.M
Last changed   : 11/11/2015 9:46:50 AM by SYSTEM
Analysis Method : D:\2014\CHRIS\DATA\DDCOPPERCOMPOUNDS\EPI AIP IIIS 2015-11-11 09-46-50\10
                                           TO 100 OVER 15 MINS 10UL.M (Sequence Method)
Last changed   : 11/11/2015 4:29:12 PM by SYSTEM
                                           (modified after loading) (Current integration events modified)
=====

```

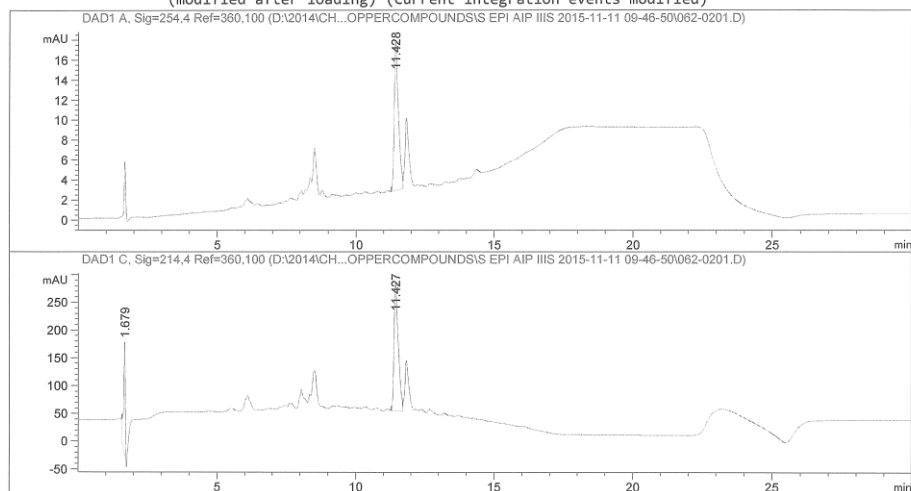

=====  
Fraction Information  
=====

No Fractions found.  
=====

=====  
Area Percent Report  
=====

```

Sorted By      : Signal
Multiplier    : 1.0000
Dilution      : 1.0000
Use Multiplier & Dilution Factor with ISTDs

```

From vial

20151125\_Chris\_SEPIAIP3\_3 86 (0.296) Sm (SG, 2x0.50); Cm (80:113)

1: MS2 ES+  
3.80e7

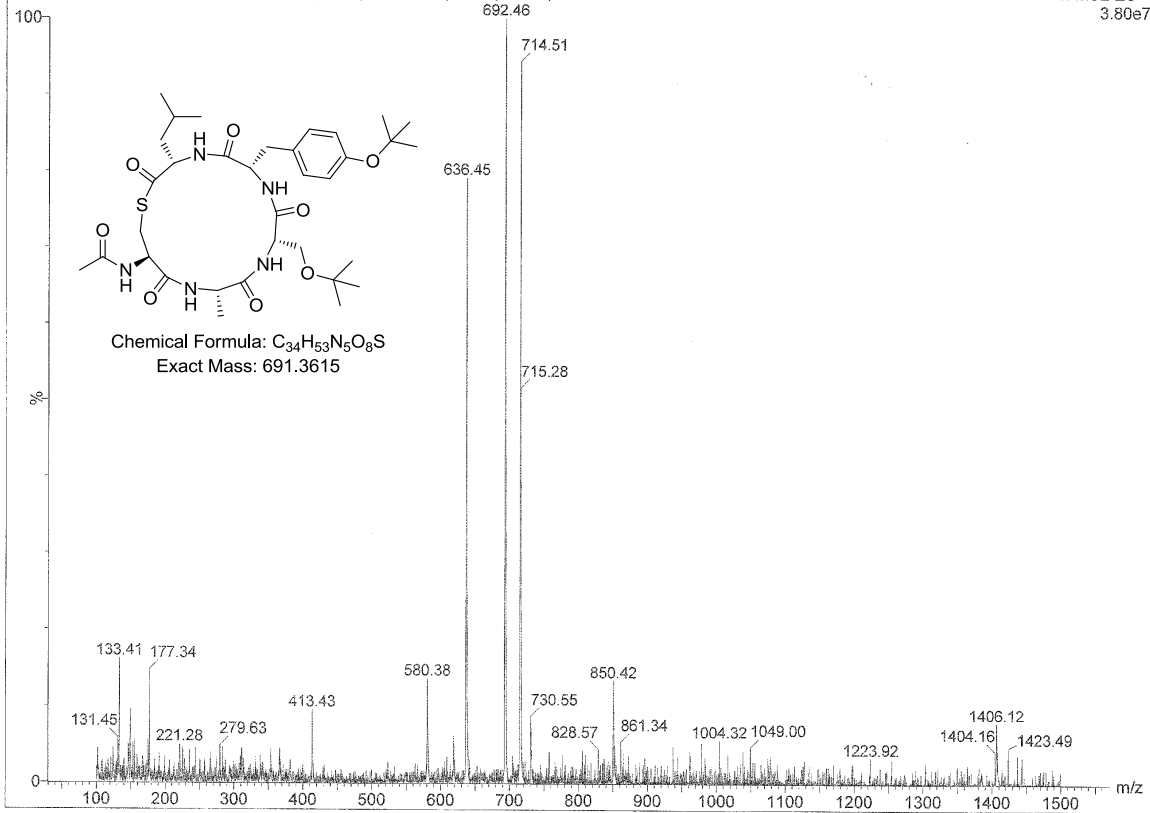

**Compound 5**; **Compound 5** was prepared utilising general procedure 4 with **14**. The crude material was purified *via* semi-

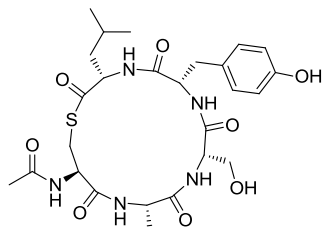

Chemical Formula: C<sub>26</sub>H<sub>37</sub>N<sub>5</sub>O<sub>8</sub>S  
Exact Mass: 579.2363

preparative RP-HPLC, and lyophilised to afford **5** (9.1 mg, 71.8 %). MS (ESI<sup>+</sup>) for C<sub>27</sub>H<sub>38</sub>N<sub>5</sub>O<sub>8</sub>S, *m/z* 580.16; HRMS (ESI<sup>+</sup>) calculated 580.2363, found, 580.2367. RP-HPLC Onyx Monolithic C18 100 × 4.6 mm, 10-100% B in 15 min, *t<sub>R</sub>* 6.55 min. <sup>1</sup>H NMR (300 MHz, DMSO) δ 9.16 (s, 1H), 8.10 (d, *J* = 8.0 Hz, 2H), 8.06 (d, *J* = 7.4 Hz, 1H), 8.01 (d, *J* = 7.8 Hz, 1H), 7.81 (d, *J* = 8.3 Hz, 1H), 7.33 (s, 1H), 6.98 (d, *J* = 8.5 Hz, 2H), 6.89 (s, 1H), 6.61 (d, *J* = 8.5 Hz, 2H), 4.51 – 4.30 (m, 3H), 4.26 (dd, *J* = 13.2, 6.0 Hz, 1H), 4.20 – 4.10 (m, 1H), 3.65 – 3.49 (m, 6H), 2.92 (dd, *J* = 14.2, 3.9 Hz, 2H), 2.79 (d, *J* = 5.3 Hz, 1H), 2.75 (d, *J* = 5.2 Hz, 1H), 2.70 – 2.56 (m, 2H), 2.44 (d, *J* = 5.4 Hz, 1H), 2.35 (d, *J* = 7.5 Hz, 1H), 2.30 (d, *J* = 7.3 Hz, 1H), 1.86 (s, 3H), 1.67 – 1.39 (m, 3H), 0.87 (d, *J* = 6.3 Hz, 3H), 0.82 (d, *J* = 6.3 Hz, 3H). <sup>13</sup>C NMR (75 MHz, DMSO) δ 176.39, 174.74, 174.59, 173.46, 172.42, 172.30, 172.18, 172.11, 158.33, 132.76, 130.16, 117.41, 64.30, 57.70, 57.57, 56.42, 52.91, 50.95, 42.51, 38.98, 28.79, 26.80, 25.46, 25.10, 23.93, 20.65, 20.49.

Data File C:\CHEM32\...\O\PURIFIED TR S EPI AND S LUG AIP#2 2015-12-17 13-51-21\087-0201.D  
Sample Name: Tr S epi AIP II 6.5 min

```

=====
Acq. Operator   : Simil20102015                      Seq. Line :    2
Acq. Instrument : LC1260                            Location  : Vial 87
Injection Date  : 12/17/2015 2:24:49 PM                Inj       :    1
                                                    Inj Volume: 100.000 µl

Acq. Method    : C:\CHEM32\1\DATA\DEMO\PURIFIED TR S EPI AND S LUG AIP#2 2015-12-17 13-
                    51-21\10 TO 100 OV 15MIN 100UL.M
Last changed   : 12/10/2015 4:12:03 PM by Simil20102015
Analysis Method : C:\CHEM32\1\DATA\DEMO\PURIFIED TR S EPI AND S LUG AIP#2 2016-01-05 09-
                    33-14\10 TO 100 OV 15MIN 20UL.M
Last changed   : 1/6/2016 3:19:20 PM by Simil20102015
                    (modified after loading)
=====

```

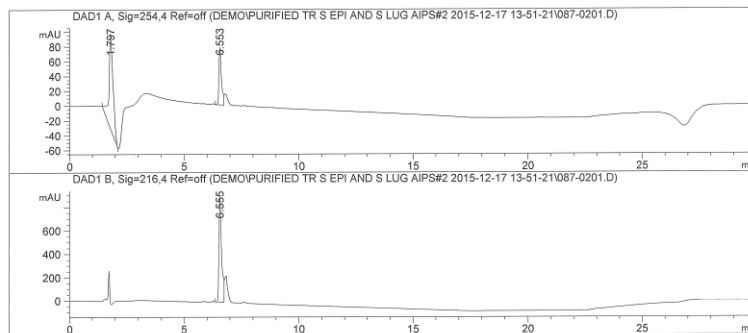

=====  
Area Percent Report  
=====

Sorted By : Signal  
Multiplier: : 1.0000  
Dilution: : 1.0000  
Use Multiplier & Dilution Factor with ISTDs

Signal 1: DAD1 A, Sig=254,4 Ref=off

| Peak # | RetTime [min] | Type | Width [min] | Area [mAU*s] | Height [mAU] | Area %  |
|--------|---------------|------|-------------|--------------|--------------|---------|
| 1      | 1.797         | BB   | 0.1759      | 1600.58044   | 127.94724    | 73.1662 |
| 2      | 6.553         | VV   | 0.1109      | 587.01422    | 77.06809     | 26.8338 |

Totals : 2187.59467 205.01534

Signal 2: DAD1 B, Sig=216,4 Ref=off



From vial

20151203\_Chris\_TRSEPI\_3 86 (0.296) Sm (SG, 2x0.50); Cm (75:99)

1: MS2 ES+  
1.35e8

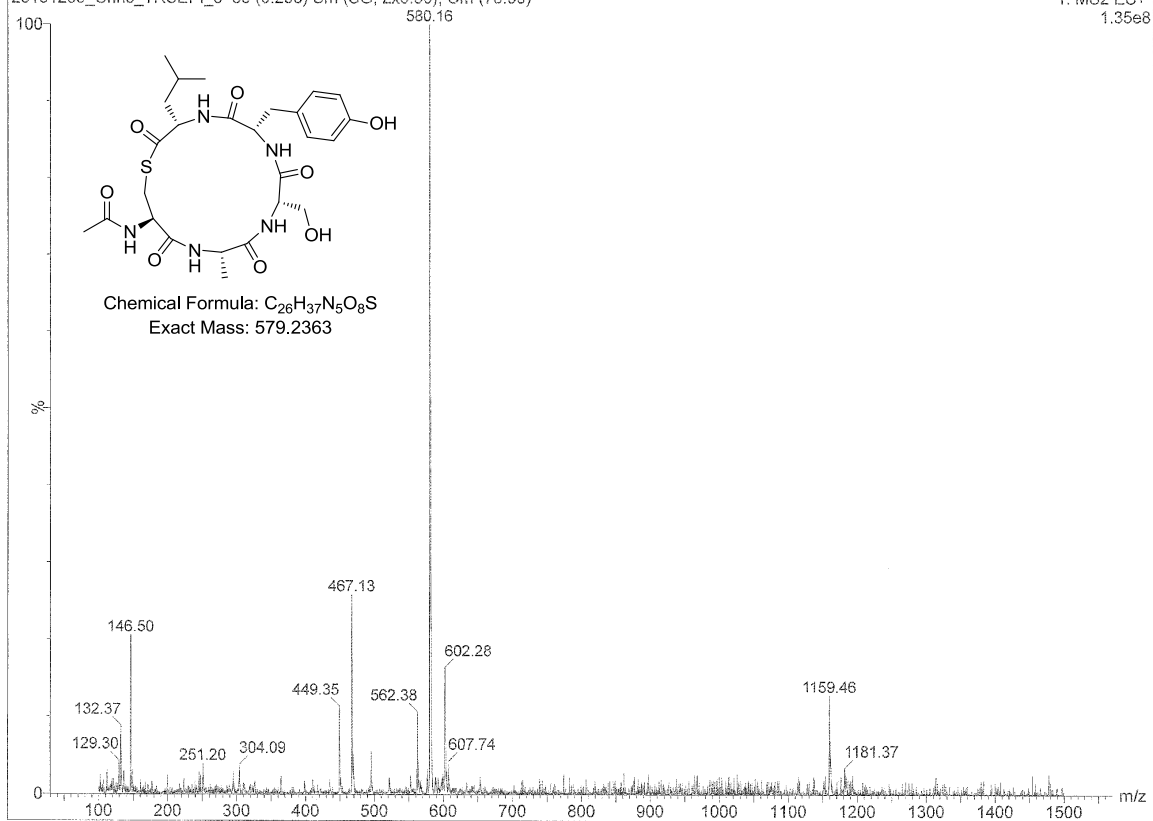

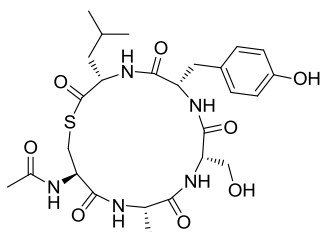

Chemical Formula:  $C_{26}H_{37}N_5O_8S$   
Exact Mass: 579.2363

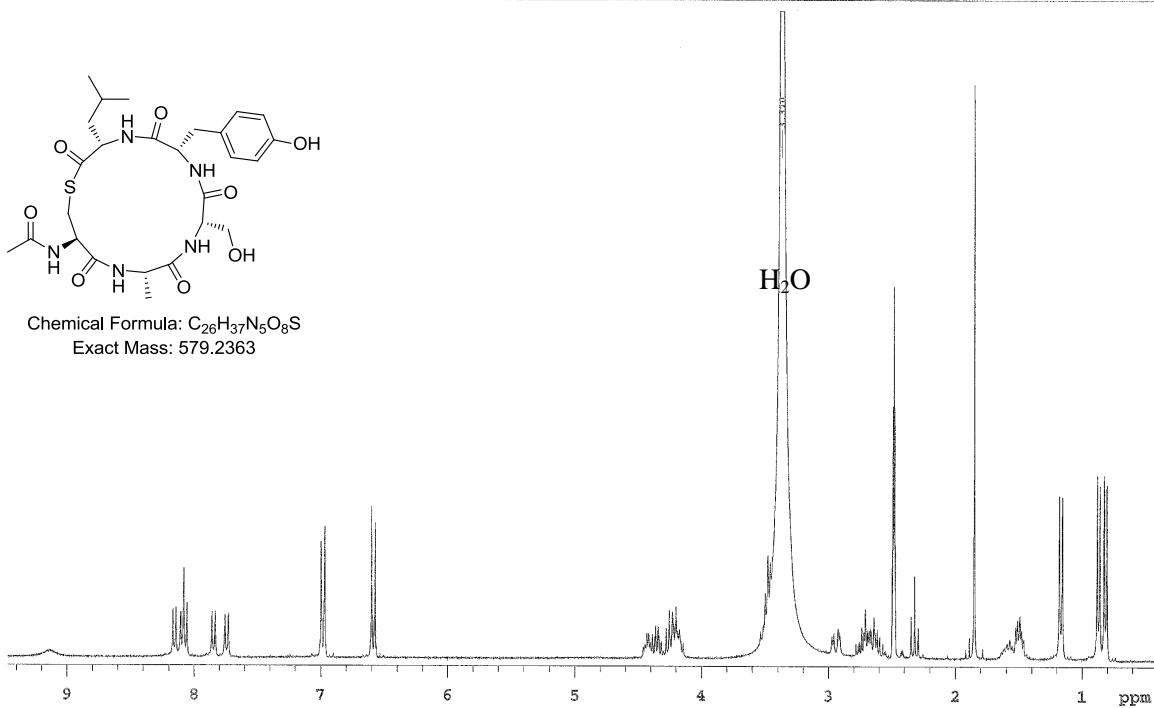

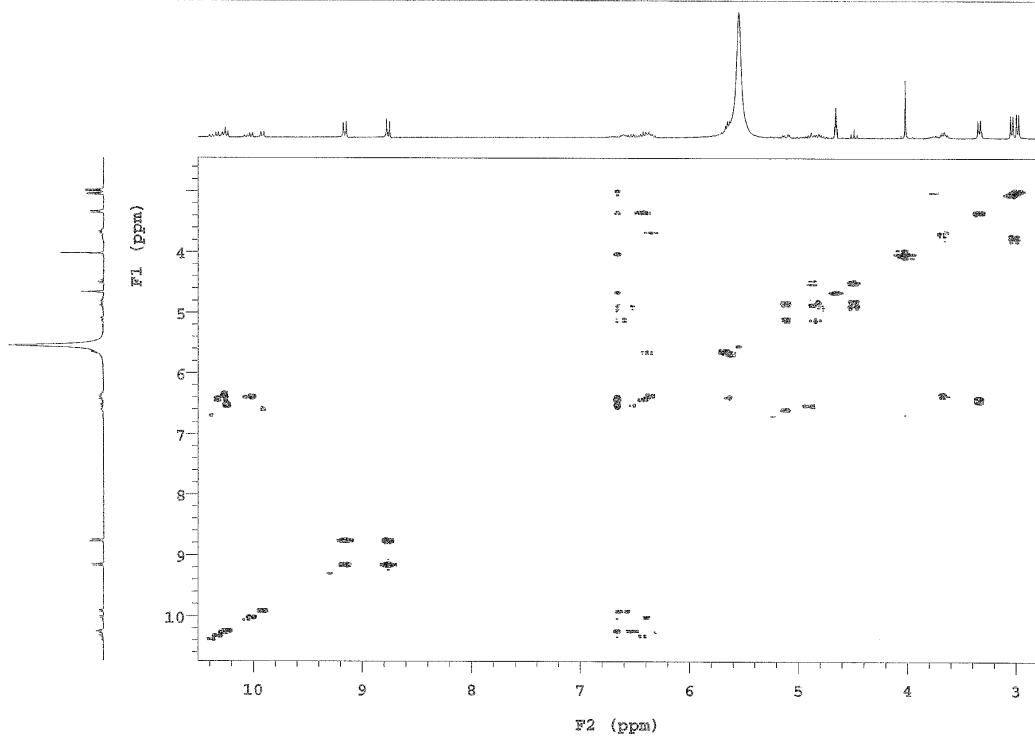

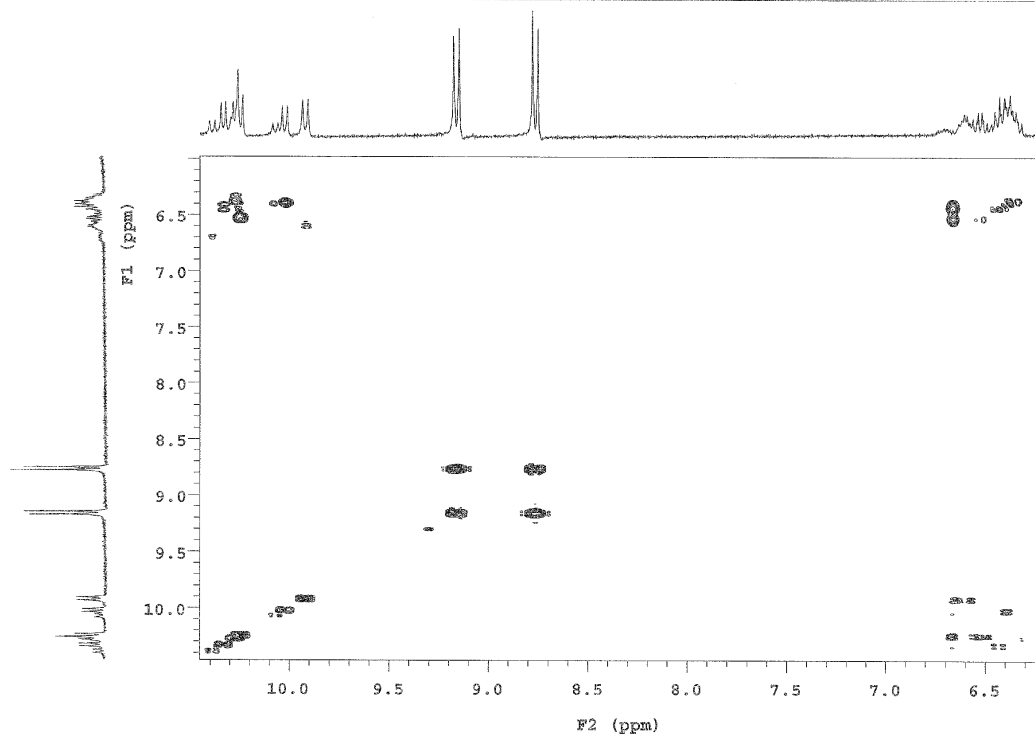

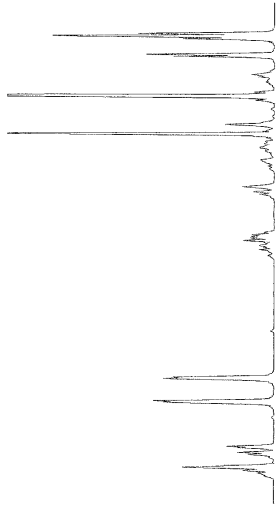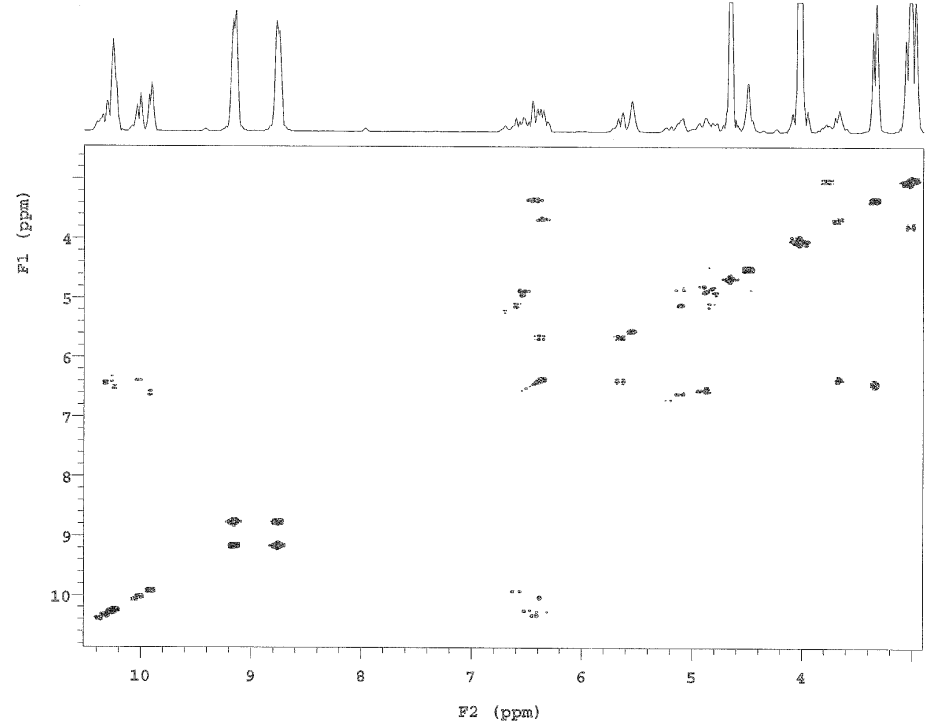

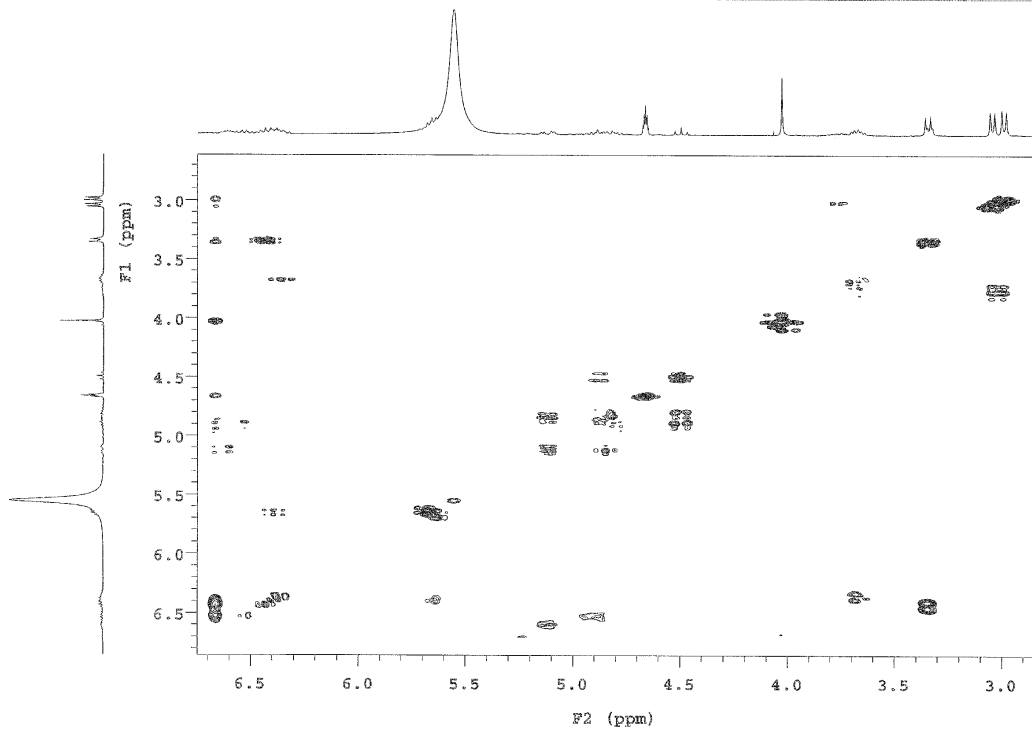

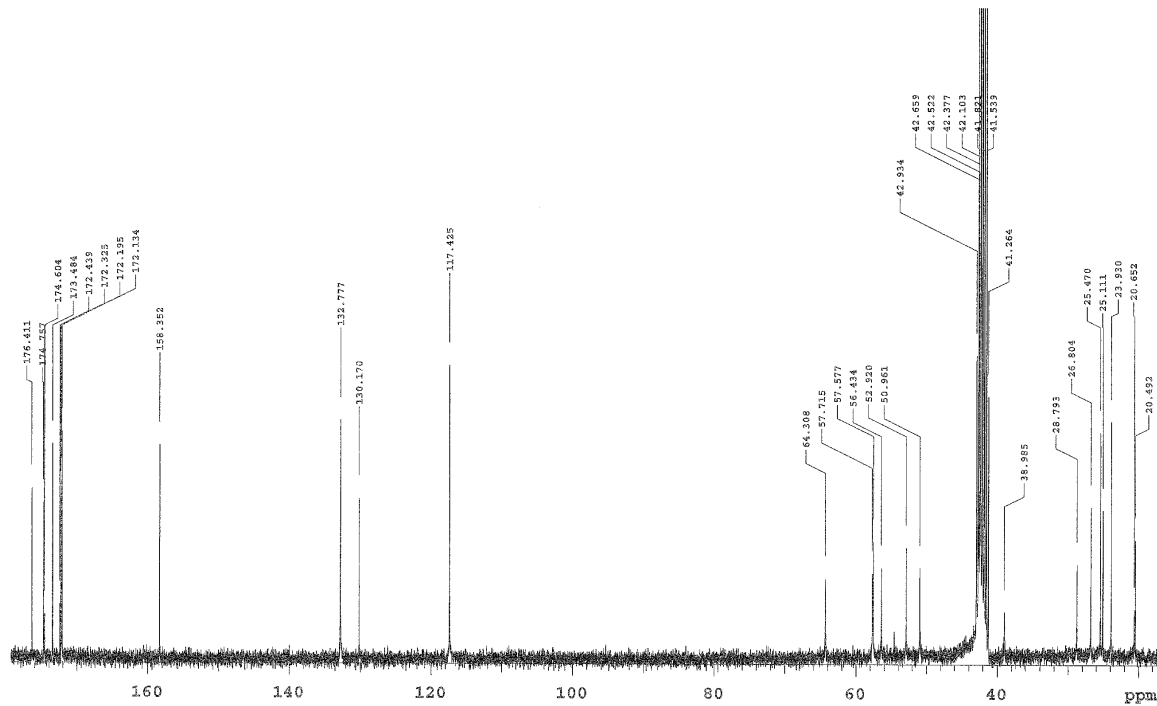

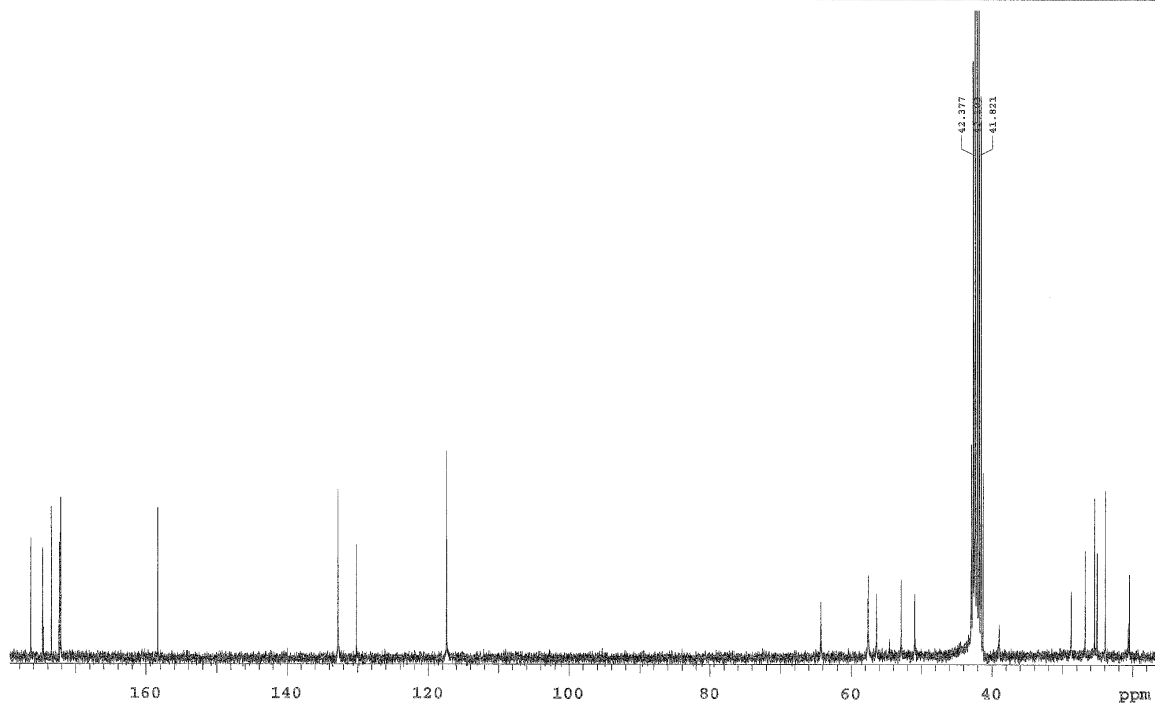



Data File D:\2014\CH...C DATA\DATA\CYCLISATION TIME COURSES 2015-12-09 08-41-41\LOADTEST.D  
 Sample Name: S epi AIP I linear

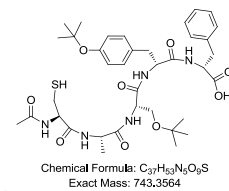

```

=====
Acq. Operator   : Simi120102015           Seq. Line :    1
Acq. Instrument : LC1260                  Location  : Vial 1
Injection Date  : 12/9/2015 8:43:37 AM    Inj       :    1
                                           Inj Volume: 40.000 µl

Acq. Method     : C:\CHEM32\1\DATA\DEMO\CYCLISATION TIME COURSES 2015-12-09 08-41-41\10 TO
                                           100 OV 15MIN 40UL.M

Last changed    : 12/9/2015 8:34:25 AM by Simi120102015
Analysis Method : D:\2014\CHRIS HPLC DATA\DATA\CYCLISATION TIME COURSES 2015-12-09 08-41-41
                                           \10 TO 100 OV 15MIN 40UL.M (Sequence Method)

Last changed    : 3/11/2016 3:03:37 PM by SYSTEM
                                           (modified after loading) (Current integration events modified)
=====
  
```

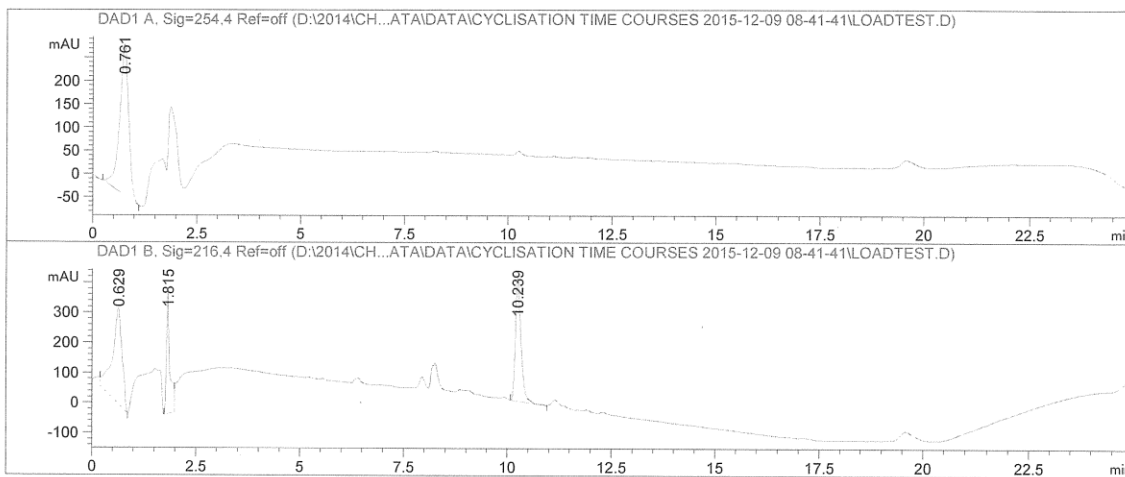

=====  
 Area Percent Report  
 =====

```

Sorted By      :      Signal
Multiplier     :      1.0000
Dilution       :      1.0000
Use Multiplier & Dilution Factor with ISTDs
  
```

Signal 1: DAD1 A, Sig=254,4 Ref=off

| Peak # | RetTime [min] | Type | Width [min] | Area [mAU*s] | Height [mAU] | Area %   |
|--------|---------------|------|-------------|--------------|--------------|----------|
| 1      | 0.761         | BB   | 0.2168      | 4873.58838   | 325.23016    | 100.0000 |

Totals :                                    4873.58838   325.23016

Data File D:\2014\CH...C DATA\DATA\CYCLISATION TIME COURSES 2015-12-09 08-41-41\002-0201.D  
 Sample Name: Pro S epi AIP I

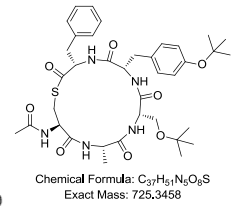

```

=====
Acq. Operator   : Simi120102015           Seq. Line :    2
Acq. Instrument : LC1260                  Location  : Vial 2
Injection Date  : 12/9/2015 9:09:51 AM    Inj       :    1
                                           Inj Volume: 20.000 µl
Acq. Method     : C:\CHEM32\1\DATA\DEMO\CYCLISATION TIME COURSES 2015-12-09 08-41-41\10 TO
100 OV 15MIN 20UL.M
Last changed    : 12/9/2015 8:37:43 AM by Simi120102015
Analysis Method : D:\2014\CHRIS HPLC DATA\DATA\CYCLISATION TIME COURSES 2015-12-09 08-41-41
\10 TO 100 OV 15MIN 20UL.M (Sequence Method)
Last changed    : 3/11/2016 3:05:03 PM by SYSTEM
                 (modified after loading) (Current integration events modified)
=====
  
```

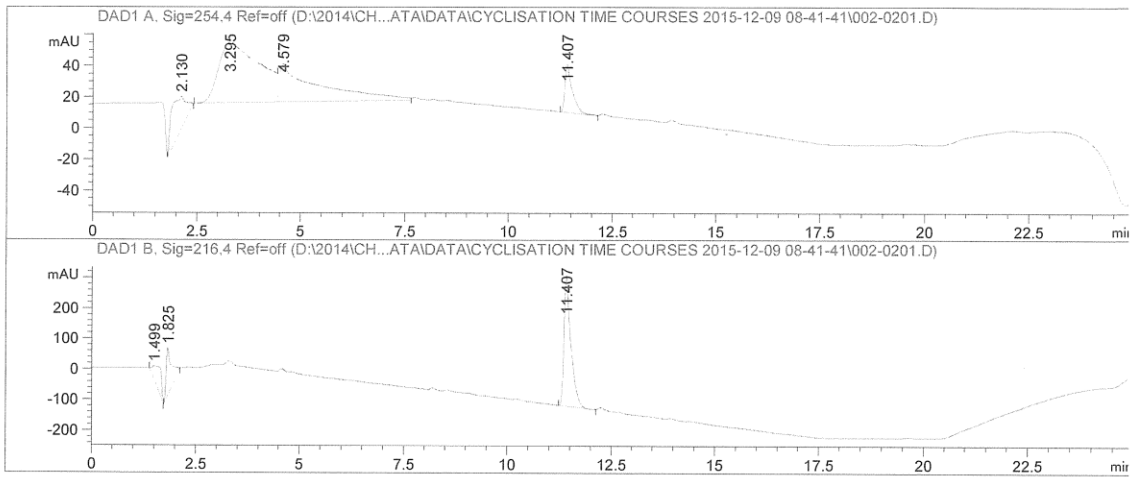

=====  
 Area Percent Report  
 =====

```

Sorted By      :      Signal
Multiplier     :      1.0000
Dilution       :      1.0000
Use Multiplier & Dilution Factor with ISTDs
  
```

Signal 1: DAD1 A, Sig=254,4 Ref=off

| Peak # | RetTime [min] | Type | Width [min] | Area [mAU*s] | Height [mAU] | Area %  |
|--------|---------------|------|-------------|--------------|--------------|---------|
| 1      | 2.130         | BB   | 0.3460      | 586.05396    | 20.71649     | 11.2059 |
| 2      | 3.295         | BV   | 0.9111      | 2659.98999   | 39.12846     | 50.8616 |
| 3      | 4.579         | VV   | 0.7974      | 1601.84705   | 24.41543     | 30.6289 |
| 4      | 11.407        | BV   | 0.1722      | 381.96857    | 30.90078     | 7.3036  |

Totals :                                    5229.85956    115.16116

Data File D:\2014\CH...C DATA\DATA\CYCLISATION TIME COURSES 2015-12-09 08-41-41\004-0401.D  
 Sample Name: Pro S epi AIP I EDCI T=1

```

=====
Acq. Operator   : Simi120102015           Seq. Line :    4
Acq. Instrument : LC1260                  Location  : Vial 4
Injection Date  : 12/9/2015 10:02:04 AM   Inj       :    1
                                           Inj Volume: 50.000 µl

Acq. Method     : C:\CHEM32\1\DATA\DEMO\CYCLISATION TIME COURSES 2015-12-09 08-41-41\10 TO
                  100 OV 15MIN 50UL.M
Last changed    : 12/9/2015 8:34:52 AM by Simi120102015
Analysis Method : D:\2014\CHRIS HPLC DATA\DATA\CYCLISATION TIME COURSES 2015-12-09 08-41-41
                  \10 TO 100 OV 15MIN 50UL.M (Sequence Method)
Last changed    : 3/11/2016 3:07:01 PM by SYSTEM
                  (modified after loading) (Current integration events modified)
=====
  
```

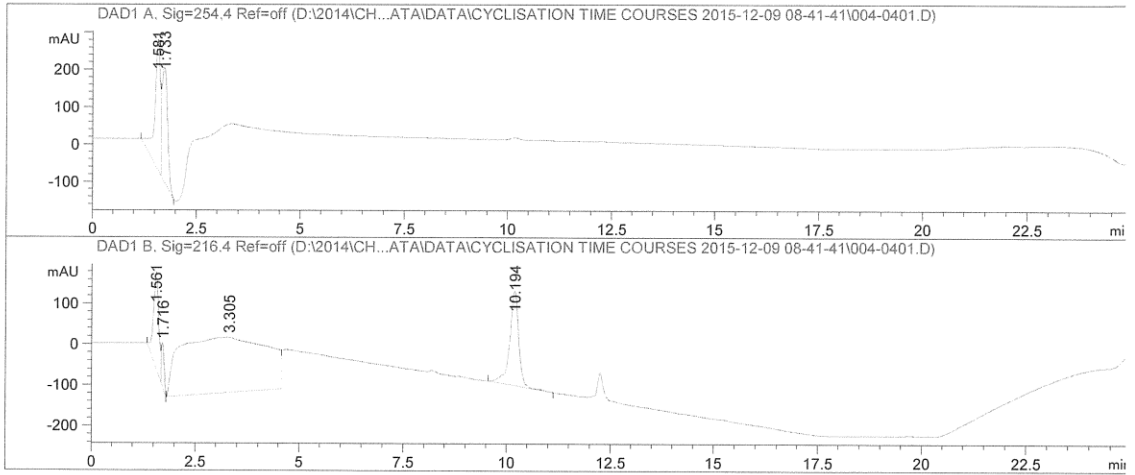

=====  
 Area Percent Report  
 =====

```

Sorted By      :      Signal
Multiplier     :      1.0000
Dilution      :      1.0000
Use Multiplier & Dilution Factor with ISTDs
  
```

Signal 1: DAD1 A, Sig=254,4 Ref=off

| Peak # | RetTime [min] | Type | Width [min] | Area [mAU*s] | Height [mAU] | Area %  |
|--------|---------------|------|-------------|--------------|--------------|---------|
| 1      | 1.581         | BV   | 0.1396      | 3367.25024   | 352.04962    | 54.4977 |
| 2      | 1.733         | VB   | 0.1370      | 2811.45020   | 306.56219    | 45.5023 |

Totals :                                    6178.70044   658.61182

Data File D:\2014\CH...C DATA\DATA\CYCLISATION TIME COURSES 2015-12-09 08-41-41\005-0501.D  
 Sample Name: Pro S epi AIP I EDCI T=2

```

=====
Acq. Operator   : Simi120102015           Seq. Line :    5
Acq. Instrument : LC1260                  Location  : Vial 5
Injection Date  : 12/9/2015 10:28:28 AM    Inj       :    1
                                           Inj Volume: 50.000 µl

Acq. Method     : C:\CHEM32\1\DATA\DEMO\CYCLISATION TIME COURSES 2015-12-09 08-41-41\10 TO
                 100 OV 15MIN 50UL.M
Last changed    : 12/9/2015 8:34:52 AM by Simi120102015
Analysis Method : D:\2014\CHRIS HPLC DATA\DATA\CYCLISATION TIME COURSES 2015-12-09 08-41-41
                 \10 TO 100 OV 15MIN 50UL.M (Sequence Method)
Last changed    : 3/11/2016 3:08:14 PM by SYSTEM
                 (modified after loading) (Current integration events modified)
=====
  
```

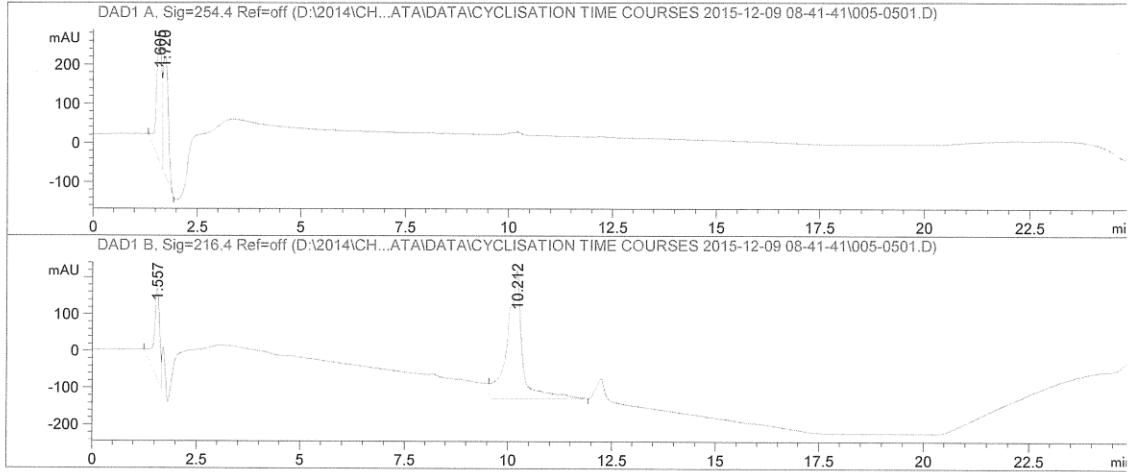

=====  
 Area Percent Report  
 =====

```

Sorted By      :      Signal
Multiplier     :      1.0000
Dilution       :      1.0000
Use Multiplier & Dilution Factor with ISTDs
  
```

Signal 1: DAD1 A, Sig=254,4 Ref=off

| Peak # | RetTime [min] | Type | Width [min] | Area [mAU*s] | Height [mAU] | Area %  |
|--------|---------------|------|-------------|--------------|--------------|---------|
| 1      | 1.605         | BV   | 0.1429      | 2877.90430   | 320.21597    | 52.3450 |
| 2      | 1.720         | VB   | 0.1291      | 2620.05444   | 321.40698    | 47.6550 |

Totals :                            5497.95874   641.62296

Data File D:\2014\CH...C DATA\DATA\CYCLISATION TIME COURSES 2015-12-09 08-41-41\006-0601.D  
 Sample Name: Pro S epi AIP I EDCI T=3

```

=====
Acq. Operator   : Simi120102015           Seq. Line :    6
Acq. Instrument : LC1260                  Location  : Vial 6
Injection Date  : 12/9/2015 10:54:51 AM   Inj       :    1
                                           Inj Volume: 50.000 µl

Acq. Method    : C:\CHEM32\1\DATA\DEMO\CYCLISATION TIME COURSES 2015-12-09 08-41-41\10 TO
100 OV 15MIN 50UL.M
Last changed   : 12/9/2015 8:34:52 AM by Simi120102015
Analysis Method : D:\2014\CHRIS HPLC DATA\DATA\CYCLISATION TIME COURSES 2015-12-09 08-41-41
\10 TO 100 OV 15MIN 50UL.M (Sequence Method)
Last changed   : 3/11/2016 3:08:17 PM by SYSTEM
                (modified after loading) (Current integration events modified)
=====
  
```

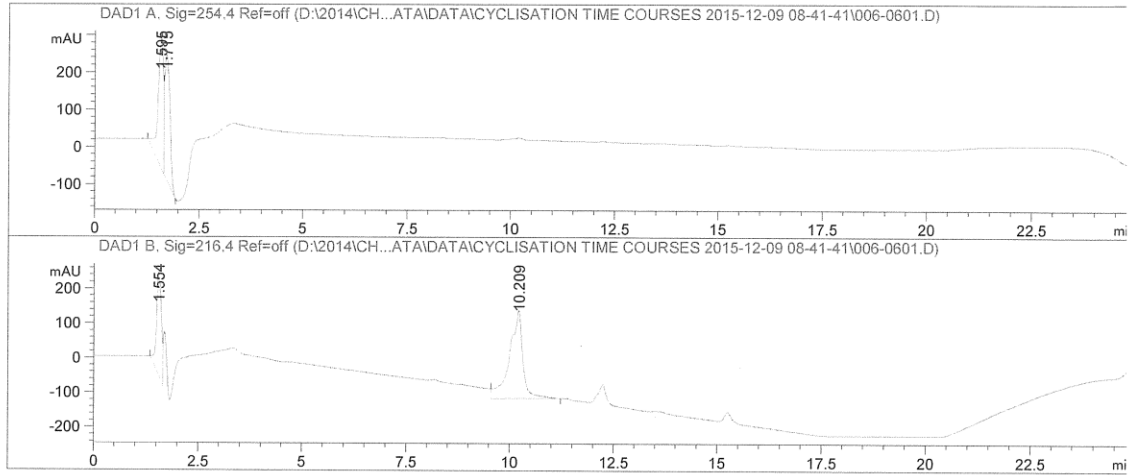

=====  
 Area Percent Report  
 =====

```

Sorted By      :      Signal
Multiplier     :      1.0000
Dilution       :      1.0000
Use Multiplier & Dilution Factor with ISTDs
  
```

Signal 1: DAD1 A, Sig=254,4 Ref=off

| Peak # | RetTime [min] | Type | Width [min] | Area [mAU*s] | Height [mAU] | Area %  |
|--------|---------------|------|-------------|--------------|--------------|---------|
| 1      | 1.595         | BV   | 0.1423      | 3228.24658   | 347.73294    | 54.0304 |
| 2      | 1.715         | VB   | 0.1271      | 2746.62378   | 337.04803    | 45.9696 |

Totals :                                    5974.87036   684.78098

Data File D:\2014\CH...C DATA\DATA\CYCLISATION TIME COURSES 2015-12-09 08-41-41\007-0701.D  
 Sample Name: Pro S epi AIP I EDCI T=4

```

=====
Acq. Operator   : Simi120102015           Seq. Line :    7
Acq. Instrument : LC1260                  Location  : Vial 7
Injection Date  : 12/9/2015 11:21:12 AM   Inj       :    1
                                           Inj Volume: 50.000 µl

Acq. Method     : C:\CHEM32\1\DATA\DEMO\CYCLISATION TIME COURSES 2015-12-09 08-41-41\10 TO
                  100 OV 15MIN 50UL.M
Last changed    : 12/9/2015 8:34:52 AM by Simi120102015
Analysis Method : D:\2014\CHRIS HPLC DATA\DATA\CYCLISATION TIME COURSES 2015-12-09 08-41-41
                  \10 TO 100 OV 15MIN 50UL.M (Sequence Method)
Last changed    : 12/9/2015 8:34:52 AM by Simi120102015
=====
  
```

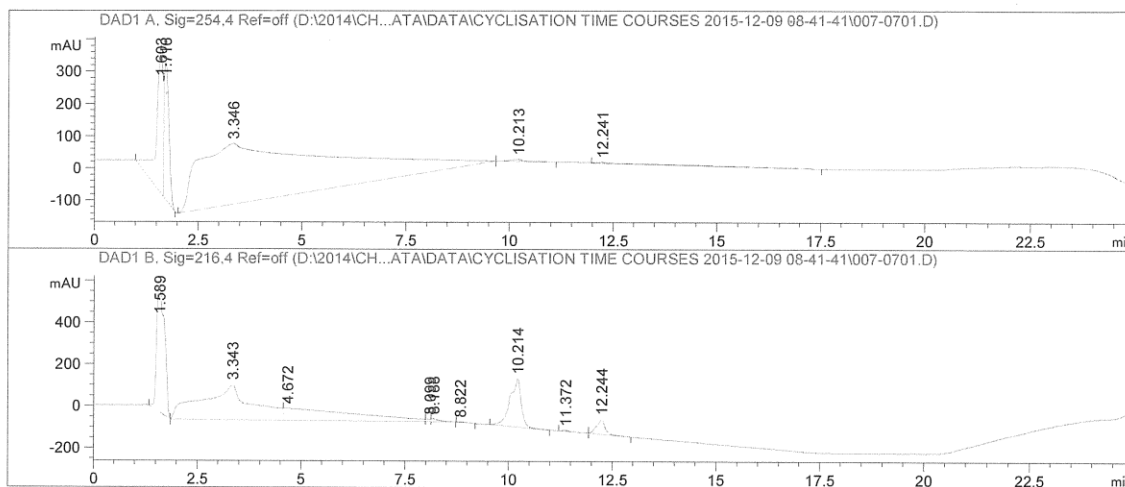

=====  
 Area Percent Report  
 =====

```

Sorted By      :      Signal
Multiplier     :      1.0000
Dilution       :      1.0000
Use Multiplier & Dilution Factor with ISTDs
  
```

Signal 1: DAD1 A, Sig=254,4 Ref=off

| Peak # | RetTime [min] | Type | Width [min] | Area [mAU*s] | Height [mAU] | Area %  |
|--------|---------------|------|-------------|--------------|--------------|---------|
| 1      | 1.603         | BV   | 0.1725      | 5201.67871   | 458.07654    | 10.4150 |
| 2      | 1.716         | VB   | 0.1248      | 3381.00098   | 425.11902    | 6.7696  |
| 3      | 3.346         | BB   | 2.6305      | 4.09253e4    | 188.53644    | 81.9426 |
| 4      | 10.213        | BB   | 0.2607      | 127.26412    | 6.43710      | 0.2548  |
| 5      | 12.241        | BB   | 1.4487      | 308.64209    | 2.53808      | 0.6180  |

Totals :                                    4.99439e4  1080.70718

Data File D:\2014\CH...C DATA\DATA\CYCLISATION TIME COURSES 2015-12-09 08-41-41\008-0801.D  
 Sample Name: Pro S epi AIP I EDCI T=5

```

=====
Acq. Operator   : Simi120102015           Seq. Line :    8
Acq. Instrument : LC1260                   Location  : Vial 8
Injection Date  : 12/9/2015 11:47:34 AM   Inj       :    1
                                           Inj Volume: 50.000 µl
Acq. Method    : C:\CHEM32\1\DATA\DEMO\CYCLISATION TIME COURSES 2015-12-09 08-41-41\10 TO
                100 OV 15MIN 50UL.M
Last changed   : 12/9/2015 8:34:52 AM by Simi120102015
Analysis Method: D:\2014\CHRIS HPLC DATA\DATA\CYCLISATION TIME COURSES 2015-12-09 08-41-41
                \10 TO 100 OV 15MIN 50UL.M (Sequence Method)
Last changed   : 12/9/2015 8:34:52 AM by Simi120102015
=====
  
```

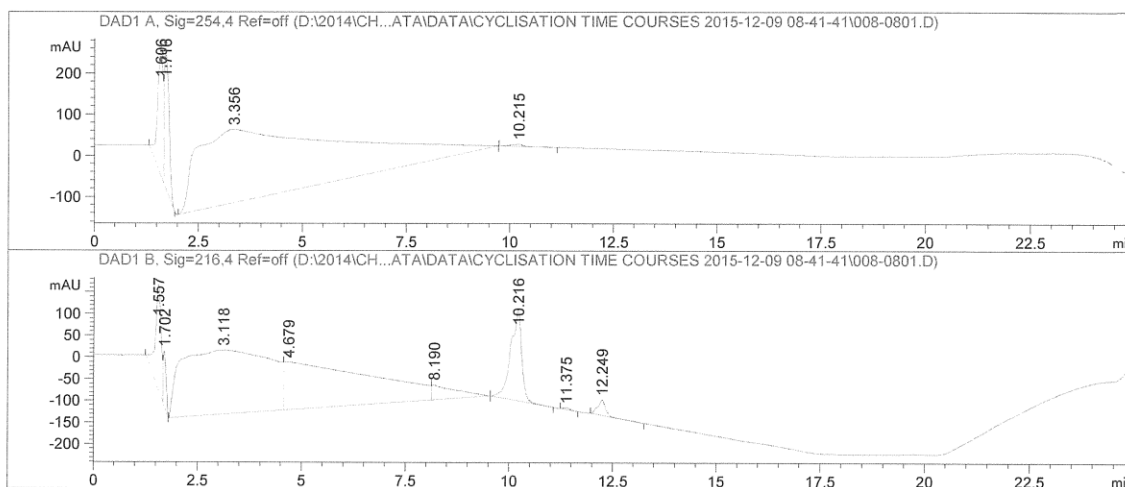

=====  
 Area Percent Report  
 =====

```

Sorted By      :      Signal
Multiplier     :      1.0000
Dilution       :      1.0000
Use Multiplier & Dilution Factor with ISTDs
  
```

Signal 1: DAD1 A, Sig=254,4 Ref=off

| Peak # | RetTime [min] | Type | Width [min] | Area [mAU*s] | Height [mAU] | Area %  |
|--------|---------------|------|-------------|--------------|--------------|---------|
| 1      | 1.606         | BV   | 0.1476      | 2910.32202   | 315.53625    | 6.1846  |
| 2      | 1.716         | VB   | 0.1274      | 2650.71338   | 330.95630    | 5.6329  |
| 3      | 3.356         | BB   | 2.8918      | 4.13931e4    | 177.55893    | 87.9624 |
| 4      | 10.215        | BB   | 0.2443      | 103.56112    | 5.58528      | 0.2201  |

Totals :                                    4.70577e4    829.63676

Data File D:\2014\CH...C DATA\DATA\CYCLISATION TIME COURSES 2015-12-09 08-41-41\009-0901.D  
 Sample Name: Pro S epi AIP I EDCI T=6

```

=====
Acq. Operator   : Simi120102015           Seq. Line :    9
Acq. Instrument : LC1260                  Location  : Vial 9
Injection Date  : 12/9/2015 12:13:57 PM   Inj       :    1
                                           Inj Volume: 50.000 µl
Acq. Method     : C:\CHEM32\1\DATA\DEMO\CYCLISATION TIME COURSES 2015-12-09 08-41-41\10 TO
100 OV 15MIN 50UL.M
Last changed    : 12/9/2015 8:34:52 AM by Simi120102015
Analysis Method : D:\2014\CHRIS HPLC DATA\DATA\CYCLISATION TIME COURSES 2015-12-09 08-41-41
\10 TO 100 OV 15MIN 50UL.M (Sequence Method)
Last changed    : 12/9/2015 8:34:52 AM by Simi120102015
=====
  
```

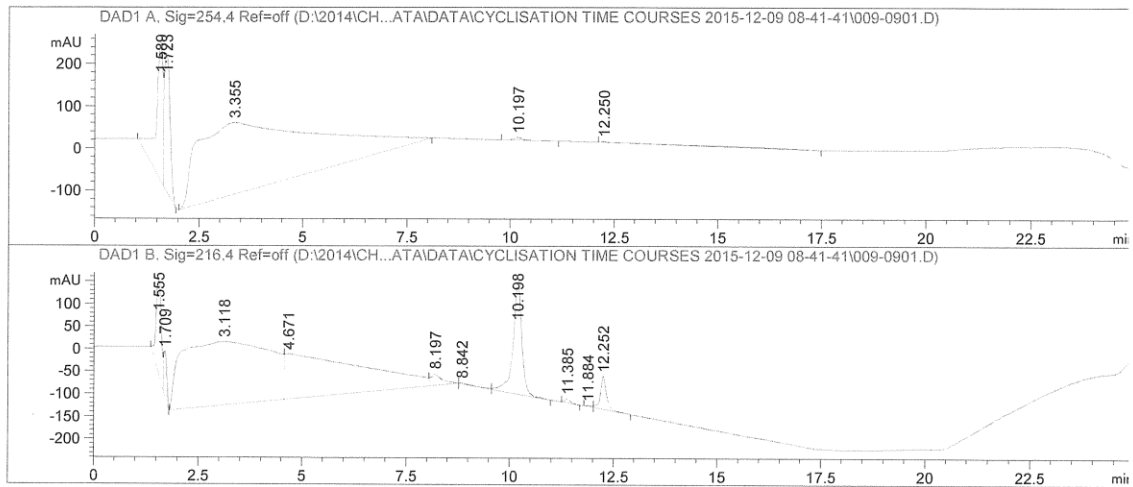

=====  
 Area Percent Report  
 =====

```

Sorted By      :      Signal
Multiplier     :      1.0000
Dilution       :      1.0000
Use Multiplier & Dilution Factor with ISTDs
  
```

Signal 1: DAD1 A, Sig=254,4 Ref=off

| Peak # | RetTime [min] | Type | Width [min] | Area [mAU*s] | Height [mAU] | Area %  |
|--------|---------------|------|-------------|--------------|--------------|---------|
| 1      | 1.589         | BV   | 0.1806      | 4022.81079   | 329.05768    | 10.1141 |
| 2      | 1.723         | VB   | 0.1354      | 2870.10156   | 323.77527    | 7.2160  |
| 3      | 3.355         | BB   | 2.4141      | 3.25097e4    | 169.00912    | 81.7353 |
| 4      | 10.197        | BB   | 0.2156      | 93.89954     | 6.45743      | 0.2361  |
| 5      | 12.250        | BB   | 1.3976      | 277.87198    | 2.37042      | 0.6986  |

Totals :                                    3.97743e4    830.66993



Sample Name: Pro S epi AIP I EDCI T=7

```

=====
Acq. Operator   : Simi120102015           Seq. Line :   10
Acq. Instrument : LC1260                  Location  : Vial 10
Injection Date  : 12/9/2015 12:40:21 PM   Inj       :    1
                                           Inj Volume: 50.000 µl

Acq. Method    : C:\CHEM32\1\DATA\DEMO\CYCLISATION TIME COURSES 2015-12-09 08-41-41\10 TO
100 OV 15MIN 50UL.M
Last changed   : 12/9/2015 8:34:52 AM by Simi120102015
Analysis Method : D:\2014\CHRIS HPLC DATA\DATA\CYCLISATION TIME COURSES 2015-12-09 08-41-41
\10 TO 100 OV 15MIN 50UL.M (Sequence Method)
Last changed   : 12/9/2015 8:34:52 AM by Simi120102015
=====
    
```

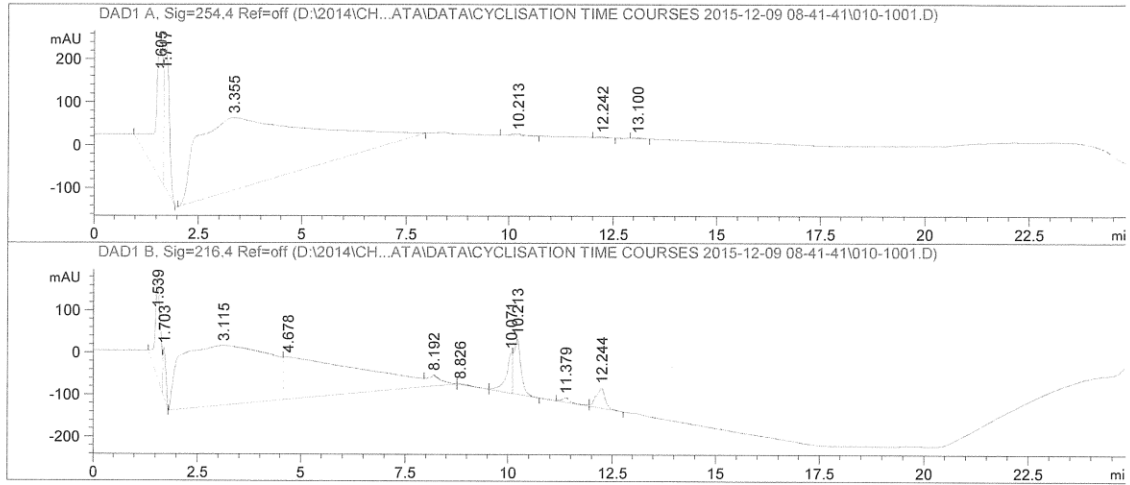

=====  
Area Percent Report  
=====

```

Sorted By      :      Signal
Multiplier     :      1.0000
Dilution       :      1.0000
Use Multiplier & Dilution Factor with ISTDs
    
```

Signal 1: DAD1 A, Sig=254,4 Ref=off

| Peak # | RetTime [min] | Type | Width [min] | Area [mAU*s] | Height [mAU] | Area %  |
|--------|---------------|------|-------------|--------------|--------------|---------|
| 1      | 1.605         | BV   | 0.1772      | 4489.14160   | 329.06613    | 11.4893 |
| 2      | 1.717         | VB   | 0.1265      | 2783.65601   | 343.53024    | 7.1244  |
| 3      | 3.355         | BB   | 2.3539      | 3.16887e4    | 168.51677    | 81.1029 |
| 4      | 10.213        | BB   | 0.2389      | 64.03980     | 3.57667      | 0.1639  |
| 5      | 12.242        | BB   | 0.1880      | 22.24874     | 1.60204      | 0.0569  |
| 6      | 13.100        | BB   | 0.2078      | 24.43504     | 1.87783      | 0.0625  |

Totals :                                3.90722e4    848.16968

Sample Name: Pro S epi AIP I EDCI T=8

```

=====
Acq. Operator   : Simi120102015           Seq. Line :   11
Acq. Instrument : LC1260                 Location  : Vial 11
Injection Date  : 12/9/2015 1:06:46 PM   Inj       :    1
                                           Inj Volume: 50.000 µl

Acq. Method     : C:\CHEM32\1\DATA\DEMO\CYCLISATION TIME COURSES 2015-12-09 08-41-41\10 TO
100 OV 15MIN 50UL.M
Last changed    : 12/9/2015 8:34:52 AM by Simi120102015
Analysis Method : D:\2014\CHRIS HPLC DATA\DATA\CYCLISATION TIME COURSES 2015-12-09 08-41-41
\10 TO 100 OV 15MIN 50UL.M (Sequence Method)
Last changed    : 12/9/2015 8:34:52 AM by Simi120102015
=====
    
```

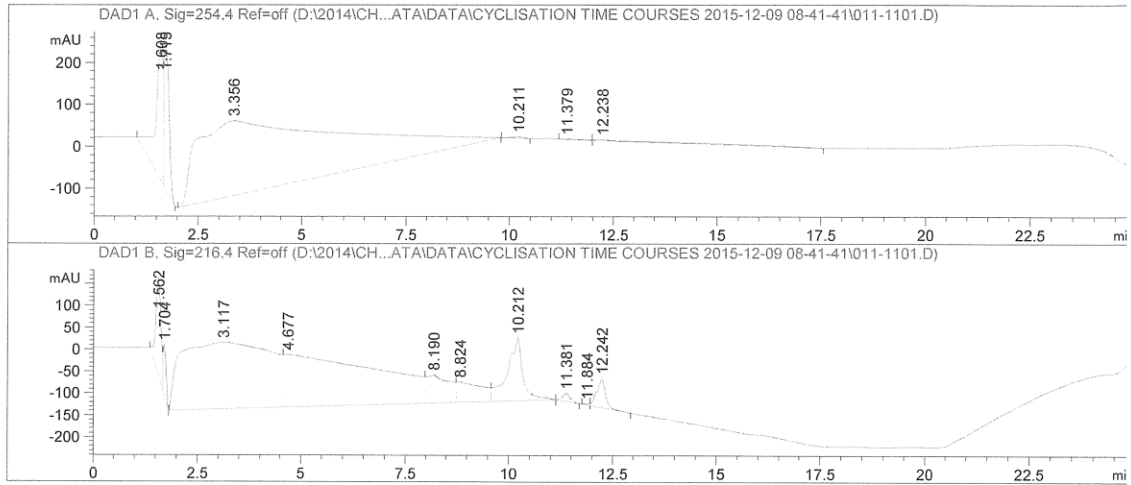

=====  
Area Percent Report  
=====

```

Sorted By      :      Signal
Multiplier     :      1.0000
Dilution       :      1.0000
Use Multiplier & Dilution Factor with ISTDs
    
```

Signal 1: DAD1 A, Sig=254,4 Ref=off

| Peak # | RetTime [min] | Type | Width [min] | Area [mAU*s] | Height [mAU] | Area %  |
|--------|---------------|------|-------------|--------------|--------------|---------|
| 1      | 1.608         | BV   | 0.1869      | 4166.40869   | 335.40826    | 8.4552  |
| 2      | 1.715         | VB   | 0.1096      | 2818.24805   | 343.94464    | 5.7193  |
| 3      | 3.356         | BB   | 2.9109      | 4.17501e4    | 177.70731    | 84.7267 |
| 4      | 10.211        | BB   | 0.2299      | 58.64925     | 3.42352      | 0.1190  |
| 5      | 11.379        | BV   | 0.3491      | 37.02816     | 1.39740      | 0.0751  |
| 6      | 12.238        | VB   | 1.7572      | 445.76926    | 3.01096      | 0.9046  |

Totals :                                    4.92762e4    864.89209

Data File D:\2014\CH...CYCLISATION AND CPGP175 DEPROTECTION 2015-12-10 16-43-38\004-0101.D  
 Sample Name: Pro S epi AIP I EDCI T=1

```

=====
Acq. Operator   : Simi120102015           Seq. Line :    1
Acq. Instrument : LC1260                  Location  : Vial 4
Injection Date  : 12/10/2015 4:45:50 PM   Inj       :    1
                                           Inj Volume: 100.000 µl

Acq. Method     : C:\CHEM32\1\DATA\DEMO\CYCLISATION AND CPGP175 DEPROTECTION 2015-12-10 16-43-38\10 TO 100 OV 15MIN 100UL.M
Last changed    : 12/10/2015 4:12:03 PM by Simi120102015
Analysis Method : D:\2014\CHRIS HPLC DATA\DATA\CYCLISATION AND CPGP175 DEPROTECTION 2015-12-10 16-43-38\10 TO 100 OV 15MIN 100UL.M (Sequence Method)
Last changed    : 12/14/2015 1:10:24 PM by Simi120102015
                 (modified after loading) (Current integration events modified)
=====
  
```

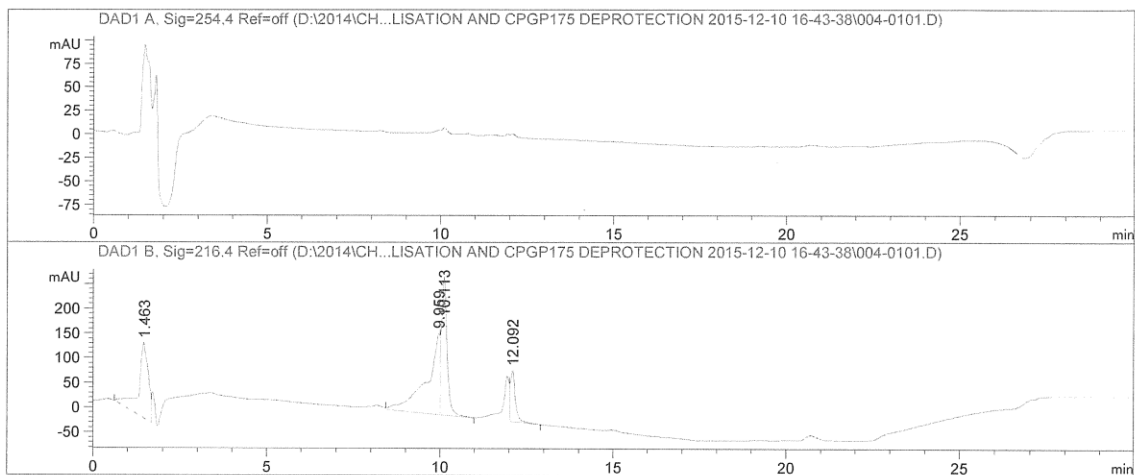

=====  
 Area Percent Report  
 =====

```

Sorted By      : Signal
Multiplier     : 1.0000
Dilution      : 1.0000
Use Multiplier & Dilution Factor with ISTDs
  
```

Signal 1: DAD1 A, Sig=254,4 Ref=off

Signal 2: DAD1 B, Sig=216,4 Ref=off

| Peak # | RetTime [min] | Type | Width [min] | Area [mAU*s] | Height [mAU] | Area %  |
|--------|---------------|------|-------------|--------------|--------------|---------|
| 1      | 1.463         | BV   | 0.2446      | 3036.20068   | 153.58002    | 26.0546 |
| 2      | 9.959         | VV   | 0.3315      | 4390.29346   | 164.40900    | 37.6746 |
| 3      | 10.113        | VB   | 0.1585      | (3154.84546) | 277.88388    | 27.0728 |
| 4      | 12.092        | VB   | 0.1419      | 1071.86414   | 104.28788    | 9.1980  |

Totals : 1.16532e4 700.16077

Sample Name: Pro S epi AIP I EDCI T=2

```

=====
Acq. Operator   : Simi120102015           Seq. Line :    2
Acq. Instrument : LC1260                  Location  : Vial 5
Injection Date  : 12/10/2015 5:17:40 PM   Inj       :    1
                                           Inj Volume: 100.000 µl

Acq. Method     : C:\CHEM32\1\DATA\DEMO\CYCLISATION AND CPGP175 DEPROTECTION 2015-12-10 16-43-38\10 TO 100 OV 15MIN 100UL.M

Last changed    : 12/10/2015 4:12:03 PM by Simi120102015
Analysis Method : D:\2014\CHRIS HPLC DATA\DATA\CYCLISATION AND CPGP175 DEPROTECTION 2015-12-10 16-43-38\10 TO 100 OV 15MIN 100UL.M (Sequence Method)

Last changed    : 3/15/2016 8:54:32 AM by SYSTEM
                 (modified after loading) (Current integration events modified)
=====
    
```

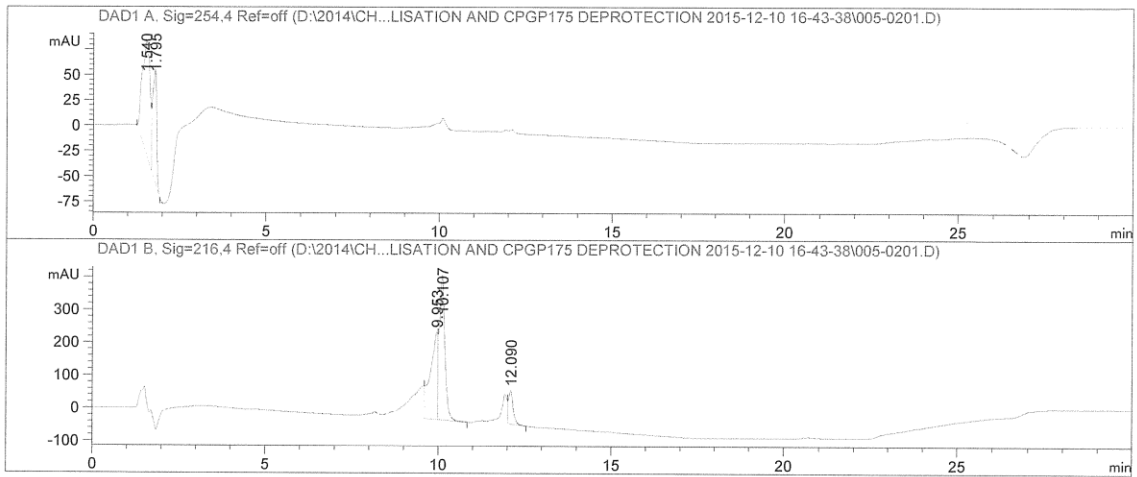

Area Percent Report

```

=====
Sorted By      :      Signal
Multiplier     :      1.0000
Dilution       :      1.0000
Use Multiplier & Dilution Factor with ISTDs
    
```

Signal 1: DAD1 A, Sig=254,4 Ref=off

| Peak # | RetTime [min] | Type | Width [min] | Area [mAU*s] | Height [mAU] | Area %  |
|--------|---------------|------|-------------|--------------|--------------|---------|
| 1      | 1.540         | BV   | 0.1986      | 1781.25818   | 112.59834    | 67.5538 |
| 2      | 1.795         | VB   | 0.1072      | 855.54169    | 111.93997    | 32.4462 |

Totals :                                    2636.79987    224.53831

Sample Name: Pro S epi AIP I EDCI T=3

```

=====
Acq. Operator   : Simi120102015           Seq. Line :    3
Acq. Instrument : LC1260                 Location  : Vial 6
Injection Date  : 12/10/2015 5:49:29 PM   Inj       :    1
                                           Inj Volume: 100.000 µl

Acq. Method     : C:\CHEM32\1\DATA\DEMO\CYCLISATION AND CPGP175 DEPROTECTION 2015-12-10 16-43
                  -38\10 TO 100 OV 15MIN 100UL.M
Last changed    : 12/10/2015 4:12:03 PM by Simi120102015
Analysis Method : D:\2014\CHRIS HPLC DATA\DATA\CYCLISATION AND CPGP175 DEPROTECTION 2015-12-
                  10 16-43-38\10 TO 100 OV 15MIN 100UL.M (Sequence Method)
Last changed    : 3/15/2016 8:54:32 AM by SYSTEM
                  (modified after loading) (Current integration events modified)
=====
    
```

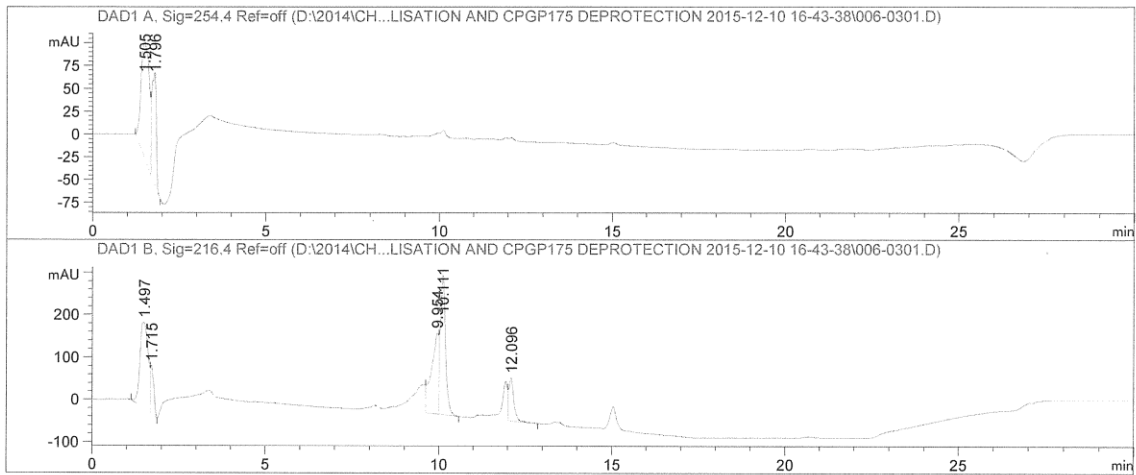

Area Percent Report

```

=====
Sorted By      : Signal
Multiplier     : 1.0000
Dilution      : 1.0000
Use Multiplier & Dilution Factor with ISTDs
    
```

Signal 1: DAD1 A, Sig=254,4 Ref=off

| Peak # | RetTime [min] | Type | Width [min] | Area [mAU*s] | Height [mAU] | Area %  |
|--------|---------------|------|-------------|--------------|--------------|---------|
| 1      | 1.505         | BV   | 0.2453      | 2191.87305   | 128.33954    | 68.0926 |
| 2      | 1.796         | VB   | 0.1123      | 1027.08752   | 124.38364    | 31.9074 |

Totals : 3218.96057 252.72318

Sample Name: Pro S epi AIP I EDCI T=4

```

=====
Acq. Operator   : Simi120102015           Seq. Line :    4
Acq. Instrument : LC1260                  Location  : Vial 7
Injection Date  : 12/10/2015 6:21:19 PM   Inj       :    1
                                           Inj Volume: 100.000 µl

Acq. Method     : C:\CHEM32\1\DATA\DEMO\CYCLISATION AND CPGP175 DEPROTECTION 2015-12-10 16-43-38\10 TO 100 OV 15MIN 100UL.M
Last changed    : 12/10/2015 4:12:03 PM by Simi120102015
Analysis Method : D:\2014\CHRIS HPLC DATA\DATA\CYCLISATION AND CPGP175 DEPROTECTION 2015-12-10 16-43-38\10 TO 100 OV 15MIN 100UL.M (Sequence Method)
Last changed    : 3/15/2016 8:55:17 AM by SYSTEM
                 (modified after loading) (Current integration events modified)
=====
    
```

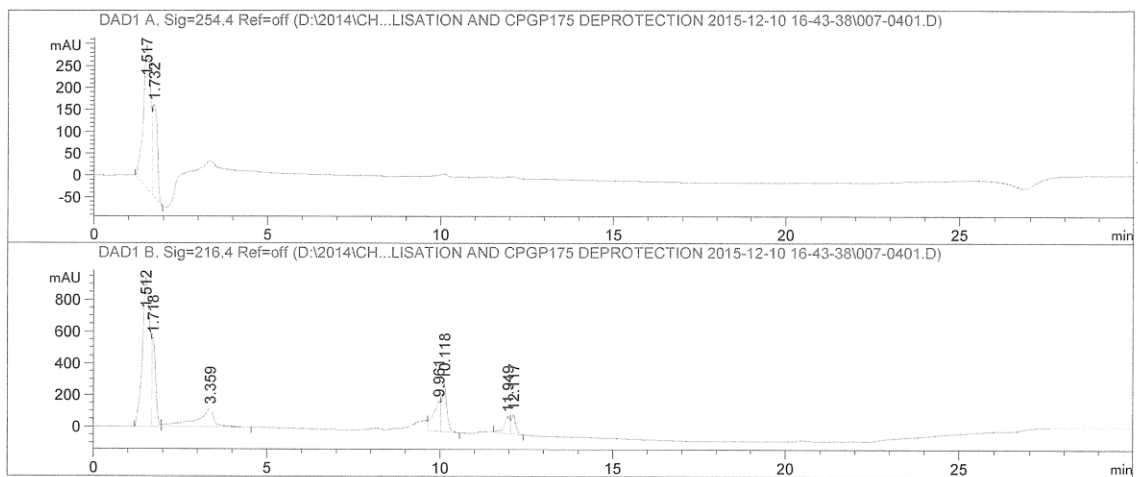

=====  
Area Percent Report  
=====

```

Sorted By      :      Signal
Multiplier     :      1.0000
Dilution       :      1.0000
Use Multiplier & Dilution Factor with ISTDs
    
```

Signal 1: DAD1 A, Sig=254,4 Ref=off

| Peak # | RetTime [min] | Type | Width [min] | Area [mAU*s] | Height [mAU] | Area %  |
|--------|---------------|------|-------------|--------------|--------------|---------|
| 1      | 1.517         | BV   | 0.1917      | 4909.50439   | 326.01376    | 72.3912 |
| 2      | 1.732         | VB   | 0.1158      | 1872.40393   | 210.45964    | 27.6088 |

Totals :                                    6781.90833    536.47340

```

=====
Acq. Operator   : Simi120102015           Seq. Line :    5
Acq. Instrument : LC1260                   Location  : Vial 8
Injection Date  : 12/10/2015 6:53:08 PM   Inj       :    1
                                           Inj Volume: 100.000 µl
Acq. Method    : C:\CHEM32\1\DATA\DEMO\CYCLISATION AND CPGP175 DEPROTECTION 2015-12-10 16-43-38\10 TO 100 OV 15MIN 100UL.M
Last changed   : 12/10/2015 4:12:03 PM by Simi120102015
Analysis Method : D:\2014\CHRIS HPLC DATA\DATA\CYCLISATION AND CPGP175 DEPROTECTION 2015-12-10 16-43-38\10 TO 100 OV 15MIN 100UL.M (Sequence Method)
Last changed   : 3/15/2016 8:56:26 AM by SYSTEM
                (modified after loading) (Current integration events modified)
=====
    
```

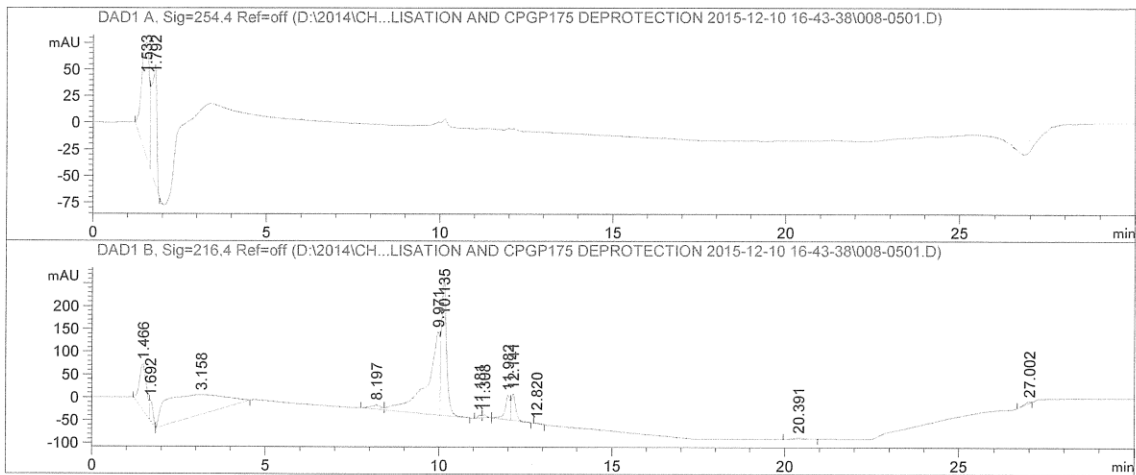

=====  
 Area Percent Report  
 =====

```

Sorted By      :      Signal
Multiplier     :      1.0000
Dilution      :      1.0000
Use Multiplier & Dilution Factor with ISTDs
    
```

Signal 1: DAD1 A, Sig=254,4 Ref=off

| Peak # | RetTime [min] | Type | Width [min] | Area [mAU*s] | Height [mAU] | Area %  |
|--------|---------------|------|-------------|--------------|--------------|---------|
| 1      | 1.533         | BV   | 0.2171      | 1665.01831   | 107.28703    | 60.6916 |
| 2      | 1.792         | VB   | 0.1301      | 1078.38867   | 112.23992    | 39.3084 |

Totals :                                      2743.40698    219.52695

```

=====
Acq. Operator   : Simi120102015           Seq. Line :    6
Acq. Instrument : LC1260                 Location  : Vial 9
Injection Date  : 12/10/2015 7:24:58 PM   Inj       :    1
                                           Inj Volume: 100.000 µl
Acq. Method     : C:\CHEM32\1\DATA\DEMO\CYCLISATION AND CPGP175 DEPROTECTION 2015-12-10 16-43-38\10 TO 100 OV 15MIN 100UL.M
Last changed    : 12/10/2015 4:12:03 PM by Simi120102015
Analysis Method : D:\2014\CHRIS HPLC DATA\DATA\CYCLISATION AND CPGP175 DEPROTECTION 2015-12-10 16-43-38\10 TO 100 OV 15MIN 100UL.M (Sequence Method)
Last changed    : 3/15/2016 8:56:35 AM by SYSTEM
                 (modified after loading) (Current integration events modified)
=====
  
```

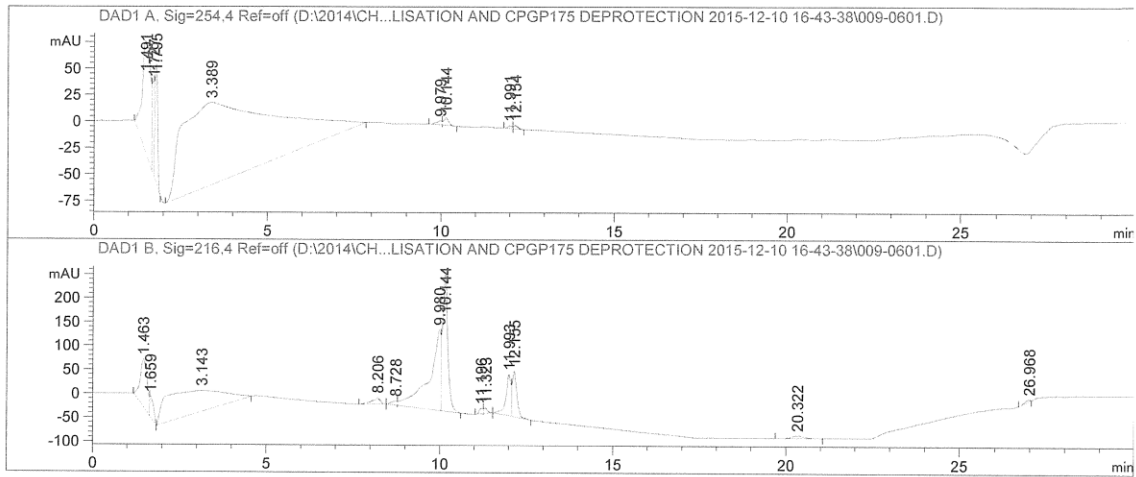

=====  
 Area Percent Report  
 =====

```

Sorted By      :      Signal
Multiplier     :      1.0000
Dilution      :      1.0000
Use Multiplier & Dilution Factor with ISTDs
  
```

Signal 1: DAD1 A, Sig=254,4 Ref=off

| Peak # | RetTime [min] | Type | Width [min] | Area [mAU*s] | Height [mAU] | Area %  |
|--------|---------------|------|-------------|--------------|--------------|---------|
| 1      | 1.491         | BV   | 0.2361      | 1843.86450   | 105.40421    | 10.8162 |
| 2      | 1.727         | VV   | 0.0568      | 341.28214    | 89.78984     | 2.0020  |
| 3      | 1.795         | VB   | 0.0843      | 635.22333    | 111.85163    | 3.7263  |
| 4      | 3.389         | BB   | 2.2422      | 1.40668e4    | 77.69736     | 82.5165 |
| 5      | 9.979         | BV   | 0.1553      | 42.23698     | 3.69582      | 0.2478  |
| 6      | 10.144        | VB   | 0.1404      | 69.88574     | 7.12447      | 0.4100  |
| 7      | 11.991        | BV   | 0.1196      | 21.28784     | 2.54482      | 0.1249  |
| 8      | 12.154        | VB   | 0.1232      | 26.67034     | 3.07549      | 0.1564  |

Totals :                                    1.70472e4    401.18364



Data File D:\2014\CH...CYCLISATION AND CPGP175 DEPROTECTION 2015-12-10 16-43-38\010-0701.D  
 Sample Name: Pro S epi AIP I EDCI T=7

```

=====
Acq. Operator   : Simi120102015           Seq. Line :    7
Acq. Instrument : LC1260                  Location  : Vial 10
Injection Date  : 12/10/2015 7:56:50 PM   Inj       :    1
                                           Inj Volume: 100.000 µl

Acq. Method     : C:\CHEM32\1\DATA\DEMO\CYCLISATION AND CPGP175 DEPROTECTION 2015-12-10 16-43-38\10 TO 100 OV 15MIN 100UL.M
Last changed    : 12/10/2015 4:12:03 PM by Simi120102015
Analysis Method : D:\2014\CHRIS HPLC DATA\DATA\CYCLISATION AND CPGP175 DEPROTECTION 2015-12-10 16-43-38\10 TO 100 OV 15MIN 100UL.M (Sequence Method)
Last changed    : 3/15/2016 8:56:55 AM by SYSTEM
                 (modified after loading) (Current integration events modified)
=====
  
```

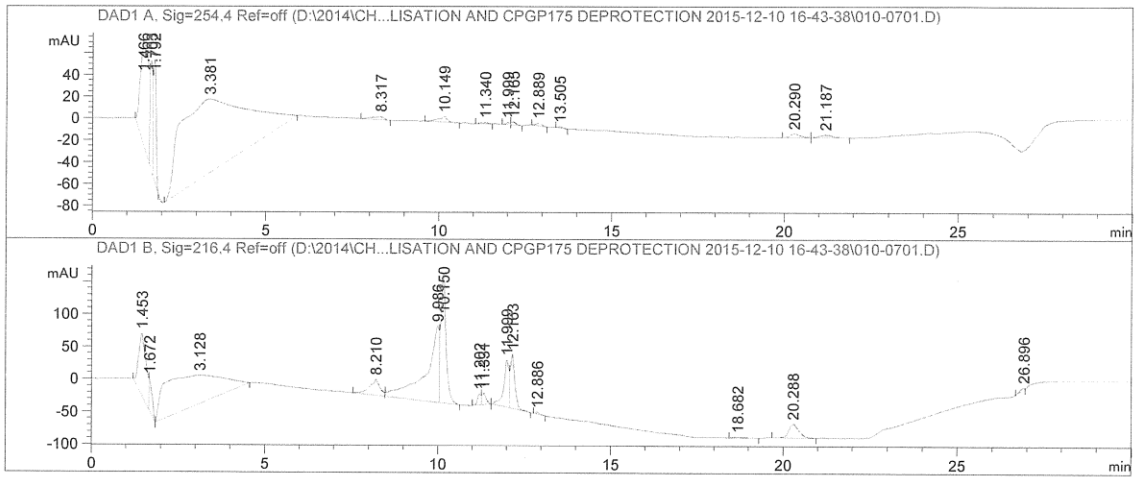

=====  
 Area Percent Report  
 =====

```

Sorted By      : Signal
Multiplier     : 1.0000
Dilution      : 1.0000
Use Multiplier & Dilution Factor with ISTDs
  
```

Signal 1: DAD1 A, Sig=254,4 Ref=off

| Peak # | RetTime [min] | Type | Width [min] | Area [mAU*s] | Height [mAU] | Area %  |
|--------|---------------|------|-------------|--------------|--------------|---------|
| 1      | 1.466         | BV   | 0.2237      | 1583.25232   | 94.39129     | 13.0924 |
| 2      | 1.703         | VV   | 0.0786      | 556.03668    | 100.40852    | 4.5980  |
| 3      | 1.792         | VB   | 0.0808      | 579.42816    | 111.17802    | 4.7915  |
| 4      | 3.381         | BB   | 1.6932      | 8997.04297   | 67.75424     | 74.3994 |
| 5      | 8.317         | BB   | 0.2922      | 67.80720     | 3.03977      | 0.5607  |
| 6      | 10.149        | BB   | 0.2199      | 86.47871     | 5.20270      | 0.7151  |
| 7      | 11.340        | BB   | 0.2114      | 18.46382     | 1.17442      | 0.1527  |
| 8      | 11.999        | BV   | 0.1154      | 16.60037     | 2.07312      | 0.1373  |
| 9      | 12.165        | VB   | 0.1302      | 26.37010     | 2.89770      | 0.2181  |
| 10     | 12.889        | BB   | 0.1486      | 27.80781     | 2.64722      | 0.2300  |

```

=====
Acq. Operator   : Simi120102015           Seq. Line :    8
Acq. Instrument : LC1260                  Location  : Vial 11
Injection Date  : 12/10/2015 8:28:43 PM   Inj       :    1
                                           Inj Volume: 100.000 µl
Acq. Method    : C:\CHEM32\1\DATA\DEMO\CYCLISATION AND CPGP175 DEPROTECTION 2015-12-10 16-43-38\10 TO 100 OV 15MIN 100UL.M
Last changed   : 12/10/2015 4:12:03 PM by Simi120102015
Analysis Method: D:\2014\CHRIS HPLC DATA\DATA\CYCLISATION AND CPGP175 DEPROTECTION 2015-12-10 16-43-38\10 TO 100 OV 15MIN 100UL.M (Sequence Method)
Last changed   : 3/15/2016 8:57:13 AM by SYSTEM
                (modified after loading) (Current integration events modified)
=====
  
```

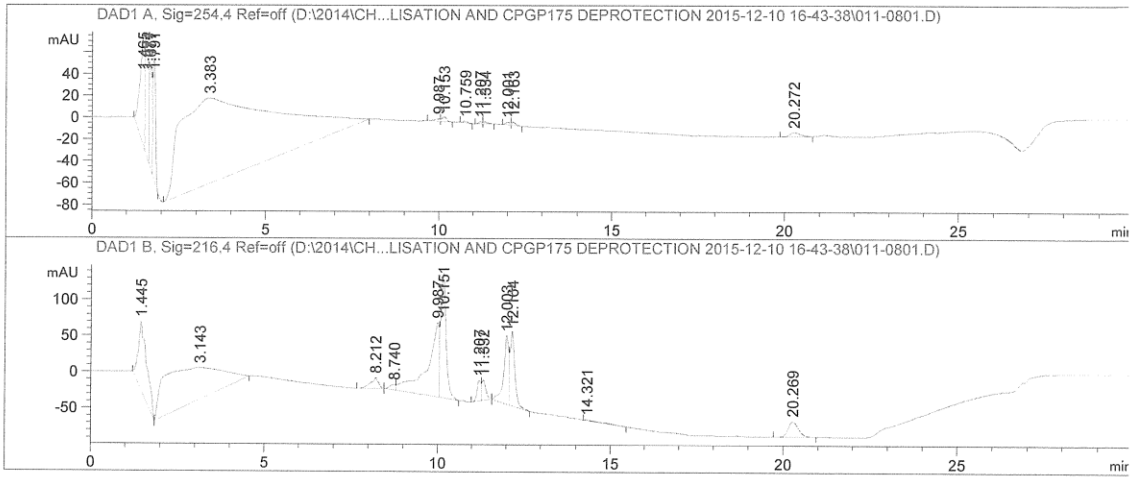

=====  
 Area Percent Report  
 =====

```

Sorted By      : Signal
Multiplier     : 1.0000
Dilution       : 1.0000
Use Multiplier & Dilution Factor with ISTDs
  
```

Signal 1: DAD1 A, Sig=254,4 Ref=off

| Peak # | RetTime [min] | Type | Width [min] | Area [mAU*s] | Height [mAU] | Area %  |
|--------|---------------|------|-------------|--------------|--------------|---------|
| 1      | 1.465         | BV   | 0.1316      | 937.44293    | 96.23300     | 5.3705  |
| 2      | 1.574         | VV   | 0.0891      | 667.00934    | 103.61787    | 3.8212  |
| 3      | 1.677         | VV   | 0.0874      | 542.16125    | 93.82185     | 3.1060  |
| 4      | 1.791         | VB   | 0.0814      | 608.92010    | 112.03243    | 3.4884  |
| 5      | 3.383         | BB   | 2.2716      | 1.44600e4    | 78.48016     | 82.8390 |
| 6      | 9.987         | BV   | 0.1528      | 25.63412     | 2.25257      | 0.1469  |
| 7      | 10.153        | VB   | 0.1351      | 41.03677     | 4.38950      | 0.2351  |
| 8      | 10.759        | BB   | 0.1353      | 13.90667     | 1.51162      | 0.0797  |
| 9      | 11.207        | BV   | 0.1033      | 13.99164     | 2.00774      | 0.0802  |
| 10     | 11.334        | VB   | 0.1380      | 20.33339     | 2.08010      | 0.1165  |

Data File D:\2014\CH...C DATA\DATA\CYCLISATION TIME COURSES 2015-12-09 08-41-41\013-1301.D  
 Sample Name: Pro S epi AIP I DCC T=1

```

=====
Acq. Operator   : Simi120102015           Seq. Line :   13
Acq. Instrument : LC1260                  Location  : Vial 13
Injection Date  : 12/9/2015 1:59:28 PM    Inj       :    1
                                           Inj Volume: 50.000 µl
Acq. Method     : C:\CHEM32\1\DATA\DEMO\CYCLISATION TIME COURSES 2015-12-09 08-41-41\10 TO
                                           100 OV 15MIN 50UL.M
Last changed    : 12/9/2015 8:34:52 AM by Simi120102015
Analysis Method : D:\2014\CHRIS HPLC DATA\DATA\CYCLISATION TIME COURSES 2015-12-09 08-41-41
                                           \10 TO 100 OV 15MIN 50UL.M (Sequence Method)
Last changed    : 12/9/2015 8:34:52 AM by Simi120102015
=====
  
```

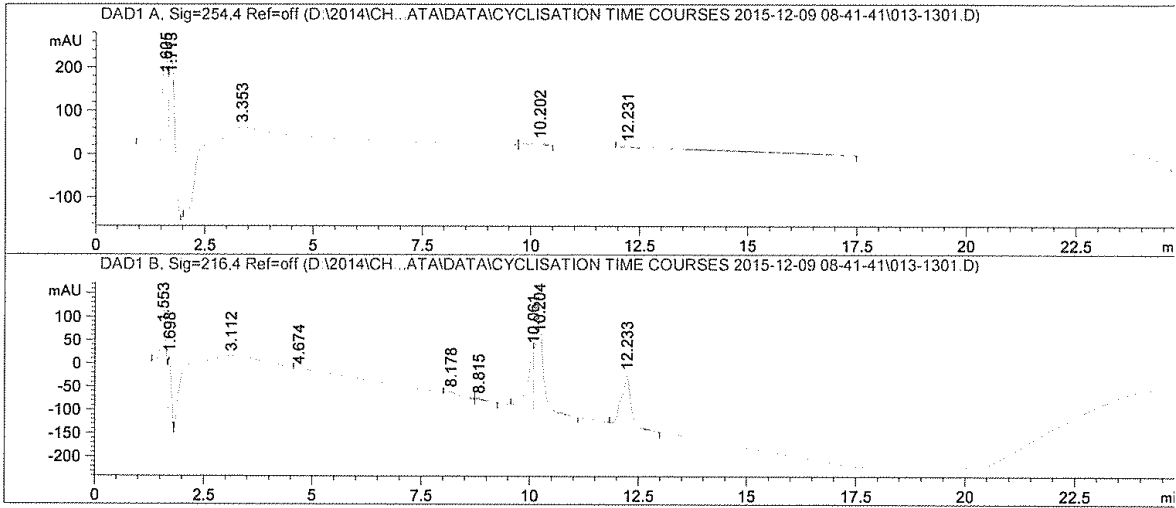

=====  
 Area Percent Report  
 =====

```

Sorted By      :      Signal
Multiplier     :      1.0000
Dilution      :      1.0000
Use Multiplier & Dilution Factor with ISTDs
  
```

Signal 1: DAD1 A, Sig=254,4 Ref=off

| Peak # | RetTime [min] | Type | Width [min] | Area [mAU*s] | Height [mAU] | Area %  |
|--------|---------------|------|-------------|--------------|--------------|---------|
| 1      | 1.605         | BV   | 0.1915      | 4572.15869   | 347.44028    | 9.2912  |
| 2      | 1.713         | VB   | 0.1272      | 2888.10840   | 353.98679    | 5.8690  |
| 3      | 3.353         | BB   | 2.8775      | 4.13539e4    | 177.40935    | 84.0364 |
| 4      | 10.202        | BB   | 0.2351      | 90.66362     | 5.15845      | 0.1842  |
| 5      | 12.231        | BB   | 0.9588      | 304.67273    | 3.82686      | 0.6191  |

Totals :                                    4.92095e4    887.82172

Data File D:\2014\CH...C DATA\DATA\CYCLISATION TIME COURSES 2015-12-09 08-41-41\014-1401.D  
 Sample Name: Pro S epi AIP I DCC T=2

```

=====
Acq. Operator   : Simi120102015           Seq. Line : 14
Acq. Instrument : LC1260                  Location  : Vial 14
Injection Date  : 12/9/2015 2:25:50 PM    Inj       : 1
                                           Inj Volume: 50.000 µl
Acq. Method     : C:\CHEM32\1\DATA\DEMO\CYCLISATION TIME COURSES 2015-12-09 08-41-41\10 TO
                                           100 OV 15MIN 50UL.M
Last changed    : 12/9/2015 8:34:52 AM by Simi120102015
Analysis Method : D:\2014\CHRIS HPLC DATA\DATA\CYCLISATION TIME COURSES 2015-12-09 08-41-41
                                           \10 TO 100 OV 15MIN 50UL.M (Sequence Method)
Last changed    : 12/9/2015 8:34:52 AM by Simi120102015
=====
  
```

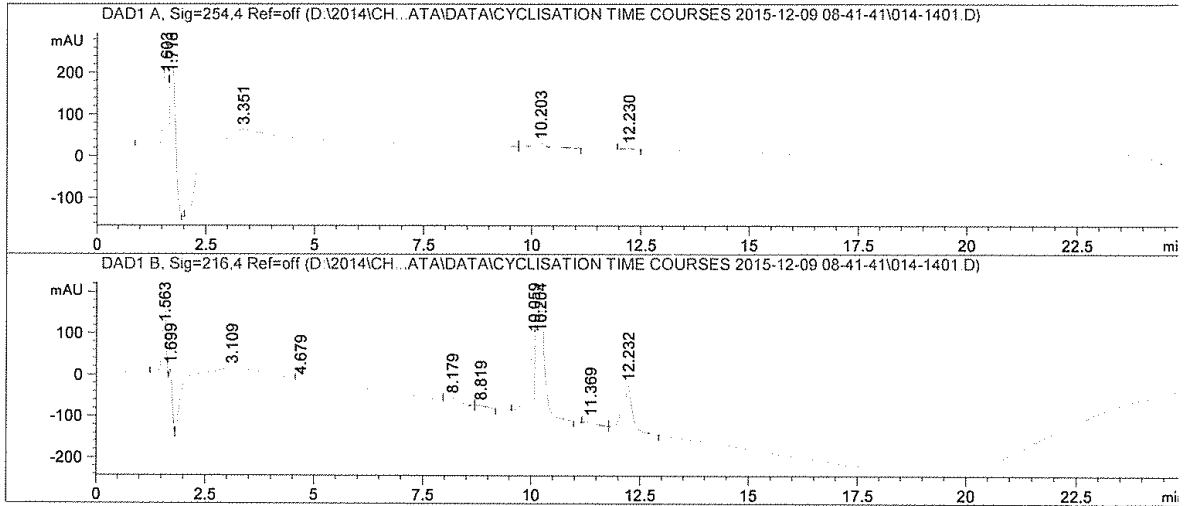

=====  
 Area Percent Report  
 =====

```

Sorted By      : Signal
Multiplier     : 1.0000
Dilution       : 1.0000
Use Multiplier & Dilution Factor with ISTDs
  
```

Signal 1: DAD1 A, Sig=254,4 Ref=off

| Peak # | RetTime [min] | Type | Width [min] | Area [mAU*s] | Height [mAU] | Area %  |
|--------|---------------|------|-------------|--------------|--------------|---------|
| 1      | 1.603         | BV   | 0.1872      | 4779.18799   | 363.93860    | 9.7463  |
| 2      | 1.716         | VB   | 0.1259      | 2873.19458   | 357.02588    | 5.8593  |
| 3      | 3.351         | BB   | 2.8653      | 4.11772e4    | 177.31512    | 83.9732 |
| 4      | 10.203        | BB   | 0.2592      | 161.51819    | 8.15060      | 0.3294  |
| 5      | 12.230        | BB   | 0.1792      | 44.99989     | 3.51958      | 0.0918  |

Totals : 4.90361e4 909.94977

Data File D:\2014\CH...C DATA\DATA\CYCLISATION TIME COURSES 2015-12-09 08-41-41\015-1501.D  
 Sample Name: Pro S epi AIP I DCC T=3

```

=====
Acq. Operator   : Simi120102015           Seq. Line :   15
Acq. Instrument : LC1260                 Location  : Vial 15
Injection Date  : 12/9/2015 2:52:11 PM   Inj       :    1
                                           Inj Volume: 50.000 µl
Acq. Method     : C:\CHEM32\1\DATA\DEMO\CYCLISATION TIME COURSES 2015-12-09 08-41-41\10 TO
                                           100 OV 15MIN 50UL.M
Last changed    : 12/9/2015 8:34:52 AM by Simi120102015
Analysis Method : D:\2014\CHRIS HPLC DATA\DATA\CYCLISATION TIME COURSES 2015-12-09 08-41-41
                                           \10 TO 100 OV 15MIN 50UL.M (Sequence Method)
Last changed    : 12/9/2015 8:34:52 AM by Simi120102015
=====
  
```

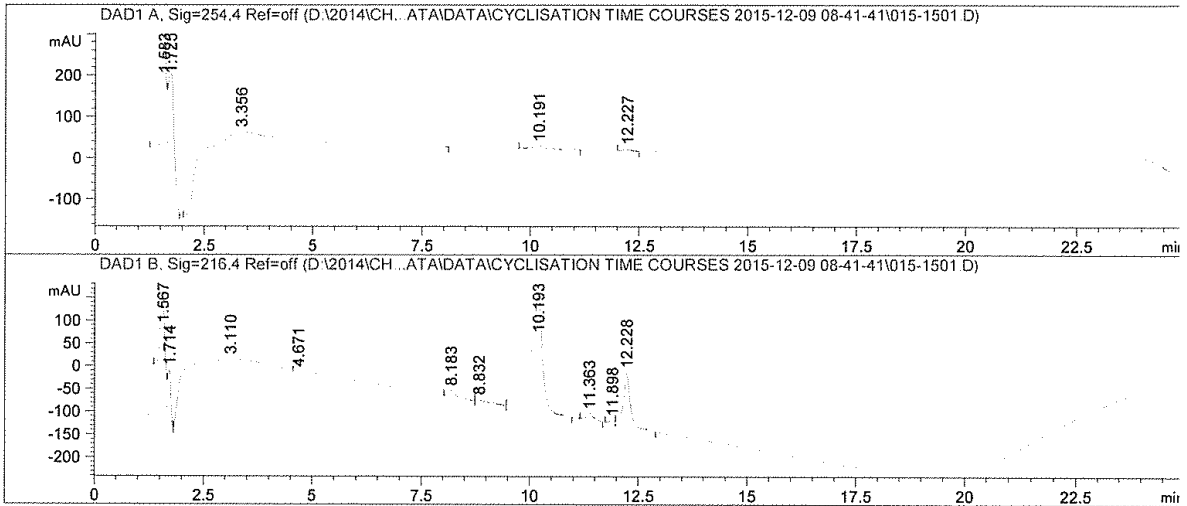

=====  
 Area Percent Report  
 =====

```

Sorted By      : Signal
Multiplier     : 1.0000
Dilution      : 1.0000
Use Multiplier & Dilution Factor with ISTDs
  
```

Signal 1: DAD1 A, Sig=254,4 Ref=off

| Peak # | RetTime [min] | Type | Width [min] | Area [mAU*s] | Height [mAU] | Area %  |
|--------|---------------|------|-------------|--------------|--------------|---------|
| 1      | 1.583         | BV   | 0.1199      | 2985.13208   | 335.22275    | 7.7443  |
| 2      | 1.725         | VB   | 0.1354      | 2756.44702   | 311.15768    | 7.1510  |
| 3      | 3.356         | BB   | 2.4180      | 3.26423e4    | 169.10605    | 84.6840 |
| 4      | 10.191        | BB   | 0.2544      | 122.40668    | 6.72286      | 0.3176  |
| 5      | 12.227        | BB   | 0.1463      | 39.73694     | 3.98539      | 0.1031  |

Totals : 3.85461e4 826.19473

Data File D:\2014\CH...C DATA\DATA\CYCLISATION TIME COURSES 2015-12-09 08-41-41\016-1601.D  
 Sample Name: Pro S epi AIP I DCC T=4

```

=====
Acq. Operator   : Simi120102015           Seq. Line :   16
Acq. Instrument : LC1260                  Location  : Vial 16
Injection Date  : 12/9/2015 3:18:32 PM    Inj       :    1
                                           Inj Volume: 50.000 µl
Acq. Method     : C:\CHEM32\1\DATA\DEMO\CYCLISATION TIME COURSES 2015-12-09 08-41-41\10 TO
                                           100 OV 15MIN 50UL.M
Last changed    : 12/9/2015 8:34:52 AM by Simi120102015
Analysis Method : D:\2014\CHRIS HPLC DATA\DATA\CYCLISATION TIME COURSES 2015-12-09 08-41-41
                                           \10 TO 100 OV 15MIN 50UL.M (Sequence Method)
Last changed    : 12/9/2015 8:34:52 AM by Simi120102015
=====
  
```

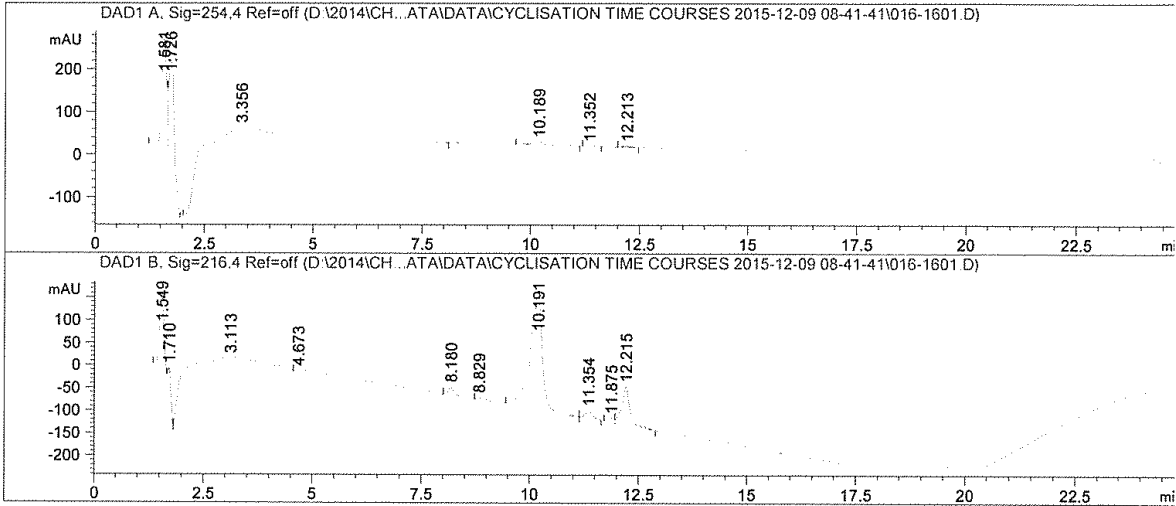

=====  
 Area Percent Report  
 =====

```

Sorted By      :      Signal
Multiplier     :      1.0000
Dilution      :      1.0000
Use Multiplier & Dilution Factor with ISTDs
  
```

Signal 1: DAD1 A, Sig=254,4 Ref=off

| Peak # | RetTime [min] | Type | Width [min] | Area [mAU*s] | Height [mAU] | Area %  |
|--------|---------------|------|-------------|--------------|--------------|---------|
| 1      | 1.581         | BV   | 0.1490      | 3199.37695   | 324.70987    | 8.2637  |
| 2      | 1.726         | VB   | 0.1294      | 2664.96948   | 312.72717    | 6.8833  |
| 3      | 3.356         | BB   | 2.4054      | 3.26748e4    | 169.76886    | 84.3956 |
| 4      | 10.189        | BB   | 0.2567      | 137.00867    | 7.04991      | 0.3539  |
| 5      | 11.352        | BB   | 0.1482      | 10.37941     | 1.04253      | 0.0268  |
| 6      | 12.213        | BB   | 0.1620      | 29.70581     | 2.75120      | 0.0767  |

Totals :                                    3.87163e4    818.04955

Data File D:\2014\CH...C DATA\DATA\CYCLISATION TIME COURSES 2015-12-09 08-41-41\017-1701.D  
 Sample Name: Pro S epi AIP I DCC T=5

```

=====
Acq. Operator   : Simi120102015           Seq. Line :   17
Acq. Instrument : LC1260                  Location  : Vial 17
Injection Date  : 12/9/2015 3:44:54 PM    Inj       :    1
                                           Inj Volume: 50.000 µl
Acq. Method     : C:\CHEM32\1\DATA\DEMO\CYCLISATION TIME COURSES 2015-12-09 08-41-41\10 TO
                  100 OV 15MIN 50UL.M
Last changed    : 12/9/2015 8:34:52 AM by Simi120102015
Analysis Method : D:\2014\CHRIS HPLC DATA\DATA\CYCLISATION TIME COURSES 2015-12-09 08-41-41
                  \10 TO 100 OV 15MIN 50UL.M (Sequence Method)
Last changed    : 12/9/2015 8:34:52 AM by Simi120102015
=====
  
```

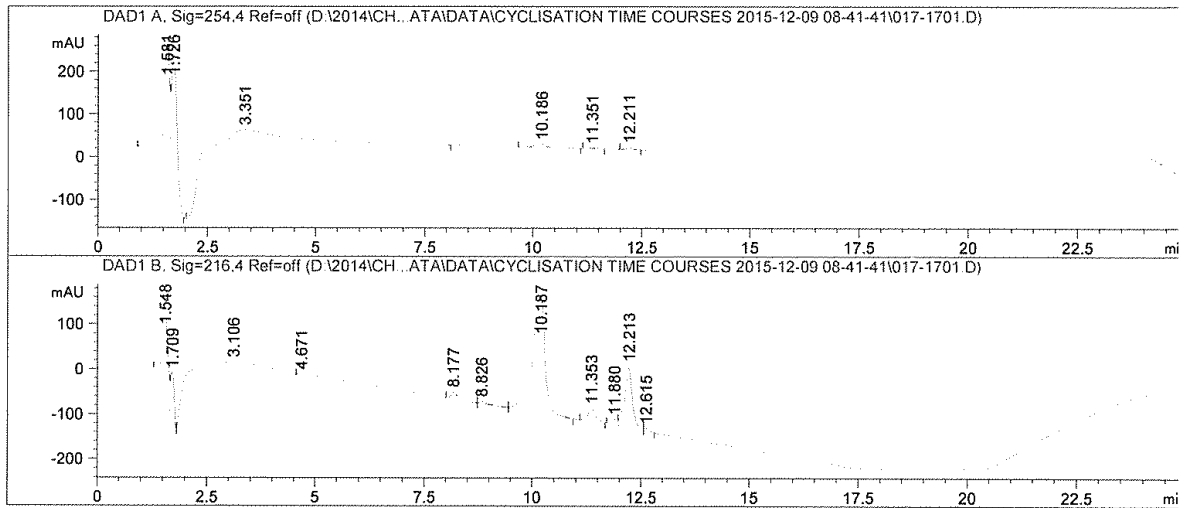

=====  
 Area Percent Report  
 =====

```

Sorted By      : Signal
Multiplier     : 1.0000
Dilution      : 1.0000
Use Multiplier & Dilution Factor with ISTDs
  
```

Signal 1: DAD1 A, Sig=254,4 Ref=off

| Peak # | RetTime [min] | Type | Width [min] | Area [mAU*s] | Height [mAU] | Area %  |
|--------|---------------|------|-------------|--------------|--------------|---------|
| 1      | 1.581         | BV   | 0.1910      | 4623.04297   | 347.97897    | 11.4510 |
| 2      | 1.726         | VB   | 0.1327      | 2822.01587   | 326.90796    | 6.9899  |
| 3      | 3.351         | BB   | 2.4078      | 3.27222e4    | 169.99074    | 81.0506 |
| 4      | 10.186        | BB   | 0.2514      | 135.57300    | 7.07972      | 0.3358  |
| 5      | 11.351        | BB   | 0.1643      | 21.82674     | 1.95492      | 0.0541  |
| 6      | 12.211        | BB   | 0.1620      | 47.89104     | 4.43370      | 0.1186  |

Totals :                    4.03726e4    858.34601

Data File D:\2014\CH...C DATA\DATA\CYCLISATION TIME COURSES 2015-12-09 08-41-41\018-1801.D  
 Sample Name: Pro S epi AIP I DCC T=6

```

=====
Acq. Operator   : Simi120102015           Seq. Line :   18
Acq. Instrument : LC1260                 Location  : Vial 18
Injection Date  : 12/9/2015 4:11:15 PM   Inj       :    1
                                           Inj Volume: 50.000 µl
Acq. Method     : C:\CHEM32\1\DATA\DEMO\CYCLISATION TIME COURSES 2015-12-09 08-41-41\10 TO
                  100 OV 15MIN 50UL.M
Last changed    : 12/9/2015 8:34:52 AM by Simi120102015
Analysis Method : D:\2014\CHRIS HPLC DATA\DATA\CYCLISATION TIME COURSES 2015-12-09 08-41-41
                  \10 TO 100 OV 15MIN 50UL.M (Sequence Method)
Last changed    : 12/9/2015 8:34:52 AM by Simi120102015
=====
  
```

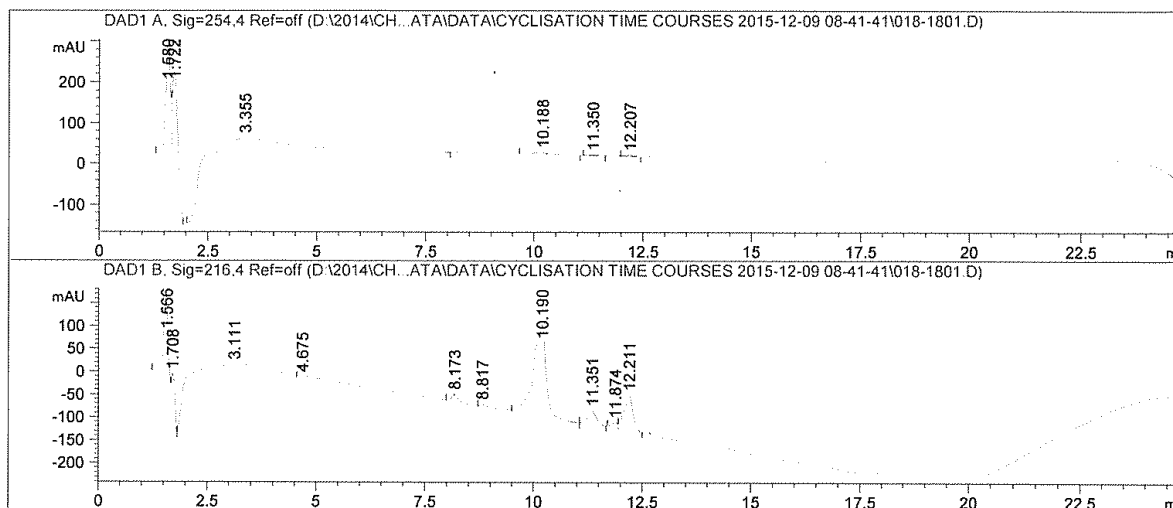

=====  
 Area Percent Report  
 =====

```

Sorted By      :      Signal
Multiplier     :      1.0000
Dilution       :      1.0000
Use Multiplier & Dilution Factor with ISTDs
  
```

Signal 1: DAD1 A, Sig=254,4 Ref=off

| Peak # | RetTime [min] | Type | Width [min] | Area [mAU*s] | Height [mAU] | Area %  |
|--------|---------------|------|-------------|--------------|--------------|---------|
| 1      | 1.580         | BV   | 0.1184      | 2893.84497   | 329.67761    | 7.5922  |
| 2      | 1.722         | VB   | 0.1303      | 2587.79492   | 307.17178    | 6.7892  |
| 3      | 3.355         | BB   | 2.4080      | 3.24771e4    | 169.45660    | 85.2058 |
| 4      | 10.188        | BB   | 0.2570      | 105.20487    | 5.35966      | 0.2760  |
| 5      | 11.350        | BB   | 0.1753      | 24.47615     | 2.04994      | 0.0642  |
| 6      | 12.207        | BB   | 0.1749      | 27.63758     | 2.35579      | 0.0725  |

Totals :                                3.81161e4    816.07138



Data File D:\2014\CH...C DATA\DATA\CYCLISATION TIME COURSES 2015-12-09 08-41-41\019-1901.D  
 Sample Name: Pro S epi AIP I DCC T=7

```

=====
Acq. Operator   : Simi120102015           Seq. Line : 19
Acq. Instrument : LC1260                  Location  : Vial 19
Injection Date  : 12/9/2015 4:37:37 PM    Inj       : 1
                                           Inj Volume: 50.000 µl
Acq. Method     : C:\CHEM32\1\DATA\DEMO\CYCLISATION TIME COURSES 2015-12-09 08-41-41\10 TO
                  100 OV 15MIN 50UL.M
Last changed    : 12/9/2015 8:34:52 AM by Simi120102015
Analysis Method : D:\2014\CHRIS HPLC DATA\DATA\CYCLISATION TIME COURSES 2015-12-09 08-41-41
                  \10 TO 100 OV 15MIN 50UL.M (Sequence Method)
Last changed    : 12/9/2015 8:34:52 AM by Simi120102015
=====
  
```

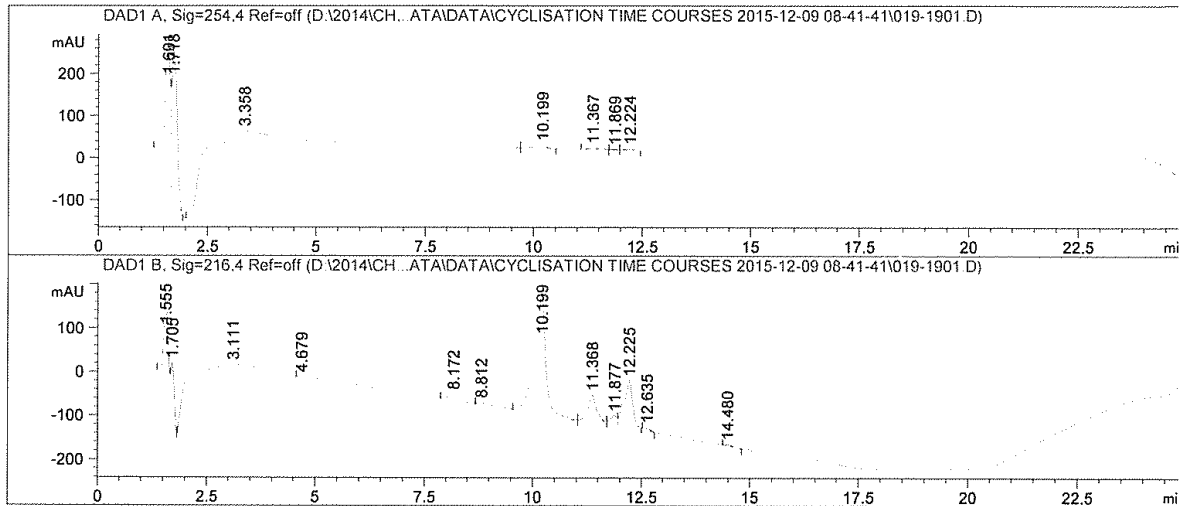

=====  
 Area Percent Report  
 =====

```

Sorted By      : Signal
Multiplier     : 1.0000
Dilution      : 1.0000
Use Multiplier & Dilution Factor with ISTDs
  
```

Signal 1: DAD1 A, Sig=254,4 Ref=off

| Peak # | RetTime [min] | Type | Width [min] | Area [mAU*s] | Height [mAU] | Area %  |
|--------|---------------|------|-------------|--------------|--------------|---------|
| 1      | 1.601         | BV   | 0.1236      | 3045.34766   | 330.10397    | 6.4429  |
| 2      | 1.718         | VB   | 0.1098      | 2739.89038   | 340.63965    | 5.7967  |
| 3      | 3.358         | BB   | 2.8858      | 4.12533e4    | 177.08905    | 87.2783 |
| 4      | 10.199        | BB   | 0.2294      | 125.25597    | 7.25652      | 0.2650  |
| 5      | 11.367        | BB   | 0.1847      | 49.42875     | 3.92963      | 0.1046  |
| 6      | 11.869        | BV   | 0.1399      | 10.39240     | 1.16696      | 0.0220  |
| 7      | 12.224        | VB   | 0.1741      | 42.75997     | 3.41457      | 0.0905  |

Totals : 4.72664e4 863.60035

Data File D:\2014\CH...C DATA\DATA\CYCLISATION TIME COURSES 2015-12-09 08-41-41\020-2001.D  
 Sample Name: Pro S epi AIP I DCC T=8

```

=====
Acq. Operator   : Simi120102015           Seq. Line :   20
Acq. Instrument : LC1260                  Location  : Vial 20
Injection Date  : 12/9/2015 5:04:02 PM    Inj       :    1
                                           Inj Volume: 50.000 µl
Acq. Method     : C:\CHEM32\1\DATA\DEMO\CYCLISATION TIME COURSES 2015-12-09 08-41-41\10 TO
                                           100 OV 15MIN 50UL.M
Last changed    : 12/9/2015 8:34:52 AM by Simi120102015
Analysis Method : D:\2014\CHRIS HPLC DATA\DATA\CYCLISATION TIME COURSES 2015-12-09 08-41-41
                                           \10 TO 100 OV 15MIN 50UL.M (Sequence Method)
Last changed    : 12/9/2015 8:34:52 AM by Simi120102015
=====
  
```

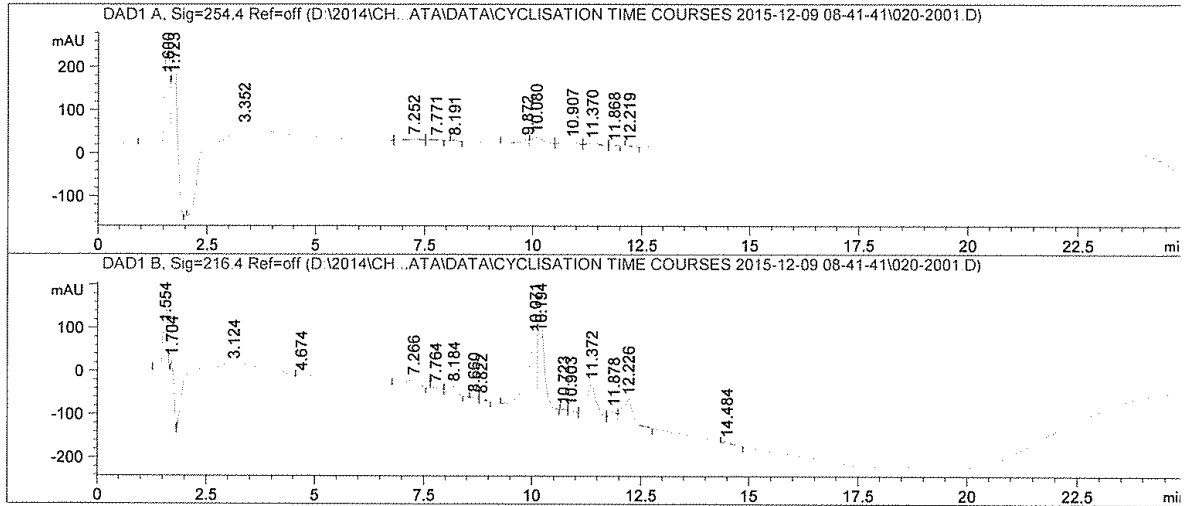

=====  
 Area Percent Report  
 =====

```

Sorted By      :      Signal
Multiplier     :      1.0000
Dilution       :      1.0000
Use Multiplier & Dilution Factor with ISTDs
  
```

Signal 1: DAD1 A, Sig=254,4 Ref=off

| Peak # | RetTime [min] | Type | Width [min] | Area [mAU*s] | Height [mAU] | Area %  |
|--------|---------------|------|-------------|--------------|--------------|---------|
| 1      | 1.600         | BV   | 0.1977      | 4705.84521   | 348.08038    | 14.1124 |
| 2      | 1.723         | VB   | 0.1287      | 2841.90308   | 342.74042    | 8.5226  |
| 3      | 3.352         | BB   | 1.9856      | 2.50345e4    | 158.24918    | 75.0765 |
| 4      | 7.252         | BV   | 0.2906      | 59.79783     | 2.67723      | 0.1793  |
| 5      | 7.771         | VB   | 0.1862      | 25.25790     | 1.86263      | 0.0757  |
| 6      | 8.191         | BB   | 0.1210      | 12.33597     | 1.61699      | 0.0370  |
| 7      | 9.872         | BV   | 0.1921      | 122.03799    | 8.67838      | 0.3660  |
| 8      | 10.080        | VV   | 0.2573      | 269.69159    | 14.61151     | 0.8088  |
| 9      | 10.907        | VV   | 0.3375      | 161.59647    | 6.51323      | 0.4846  |
| 10     | 11.370        | VV   | 0.2279      | 92.23831     | 5.72746      | 0.2766  |

Sample Name: Pro S epi AIP I DCC T=1

```

=====
Acq. Operator   : Simi120102015           Seq. Line :   10
Acq. Instrument : LC1260                 Location  : Vial 13
Injection Date  : 12/10/2015 9:32:25 PM   Inj       :    1
                                           Inj Volume: 100.000 µl
Acq. Method     : C:\CHEM32\1\DATA\DEMO\CYCLISATION AND CPGP175 DEPROTECTION 2015-12-10 16-43-38\10 TO 100 OV 15MIN 100UL.M
Last changed    : 12/10/2015 4:12:03 PM by Simi120102015
Analysis Method : D:\2014\CHRIS HPLC DATA\DATA\CYCLISATION AND CPGP175 DEPROTECTION 2015-12-10 16-43-38\10 TO 100 OV 15MIN 100UL.M (Sequence Method)
Last changed    : 3/15/2016 8:58:04 AM by SYSTEM
                 (modified after loading) (Current integration events modified)
=====
    
```

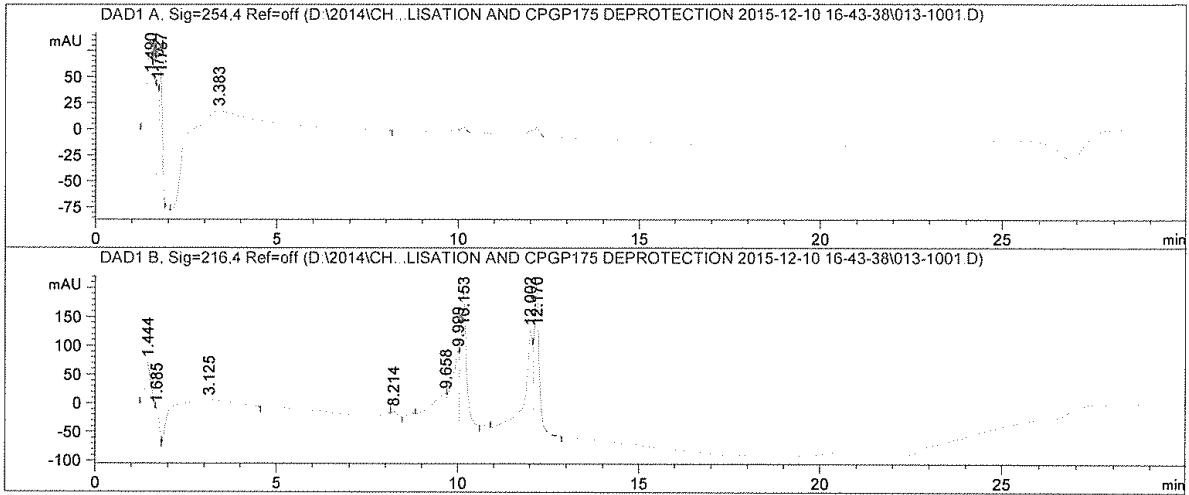

=====  
Area Percent Report  
=====

```

Sorted By      :      Signal
Multiplier     :      1.0000
Dilution       :      1.0000
Use Multiplier & Dilution Factor with ISTDs
    
```

Signal 1: DAD1 A, Sig=254,4 Ref=off

| Peak # | RetTime [min] | Type | Width [min] | Area [mAU*s] | Height [mAU] | Area %  |
|--------|---------------|------|-------------|--------------|--------------|---------|
| 1      | 1.490         | BV   | 0.2120      | 1773.21631   | 111.20480    | 10.0263 |
| 2      | 1.702         | VV   | 0.0544      | 349.67706    | 91.83134     | 1.9772  |
| 3      | 1.787         | VB   | 0.0826      | 603.62054    | 112.52320    | 3.4130  |
| 4      | 3.383         | BB   | 2.3448      | 1.49592e4    | 79.08295     | 84.5835 |

Totals :                                    1.76857e4    394.64230

Data File D:\2014\CH...CYCLISATION AND CPGP175 DEPROTECTION 2015-12-10 16-43-38\014-1101.D  
 Sample Name: Pro S epi AIP I DCC T=2

```

=====
Acq. Operator   : Simi120102015           Seq. Line :   11
Acq. Instrument : LC1260                 Location  : Vial 14
Injection Date  : 12/10/2015 10:04:14 PM Inj       :    1
                                           Inj Volume: 100.000 µl
Acq. Method     : C:\CHEM32\1\DATA\DEMO\CYCLISATION AND CPGP175 DEPROTECTION 2015-12-10 16-43-38\10 TO 100 OV 15MIN 100UL.M
Last changed    : 12/10/2015 4:12:03 PM by Simi120102015
Analysis Method : D:\2014\CHRIS HPLC DATA\DATA\CYCLISATION AND CPGP175 DEPROTECTION 2015-12-10 16-43-38\10 TO 100 OV 15MIN 100UL.M (Sequence Method)
Last changed    : 3/15/2016 8:58:30 AM by SYSTEM
                 (modified after loading) (Current integration events modified)
=====
  
```

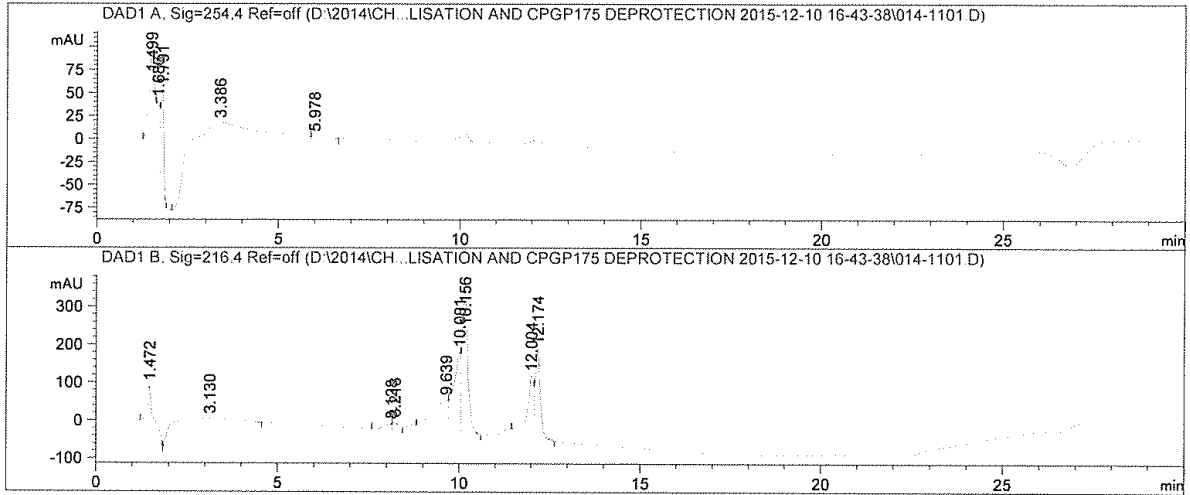

=====  
 Area Percent Report  
 =====

```

Sorted By      :      Signal
Multiplier     :      1.0000
Dilution       :      1.0000
Use Multiplier & Dilution Factor with ISTDs
  
```

Signal 1: DAD1 A, Sig=254,4 Ref=off

| Peak # | RetTime [min] | Type | Width [min] | Area [mAU*s] | Height [mAU] | Area %  |
|--------|---------------|------|-------------|--------------|--------------|---------|
| 1      | 1.499         | BV   | 0.1532      | 1512.02771   | 132.39766    | 11.0680 |
| 2      | 1.680         | VV   | 0.0858      | 499.43127    | 85.90598     | 3.6558  |
| 3      | 1.791         | VB   | 0.0851      | 619.86835    | 111.04037    | 4.5374  |
| 4      | 3.386         | BV   | 1.8387      | 1.06876e4    | 72.97361     | 78.2331 |
| 5      | 5.978         | VB   | 0.3121      | 342.30881    | 13.86132     | 2.5057  |

Totals :                                    1.36613e4    416.17895

Data File D:\2014\CH...CYCLISATION AND CPGP175 DEPROTECTION 2015-12-10 16-43-38\015-1201.D  
 Sample Name: Pro S epi AIP I DCC T=3

```

=====
Acq. Operator   : Simi120102015           Seq. Line : 12
Acq. Instrument : LC1260                 Location  : Vial 15
Injection Date  : 12/10/2015 10:36:04 PM Inj       : 1
                                           Inj Volume: 100.000 µl
Acq. Method     : C:\CHEM32\1\DATA\DEMO\CYCLISATION AND CPGP175 DEPROTECTION 2015-12-10 16-43-38\10 TO 100 OV 15MIN 100UL.M
Last changed    : 12/10/2015 4:12:03 PM by Simi120102015
Analysis Method : D:\2014\CHRIS HPLC DATA\DATA\CYCLISATION AND CPGP175 DEPROTECTION 2015-12-10 16-43-38\10 TO 100 OV 15MIN 100UL.M (Sequence Method)
Last changed    : 3/15/2016 8:58:48 AM by SYSTEM
                 (modified after loading) (Current integration events modified)
=====
  
```

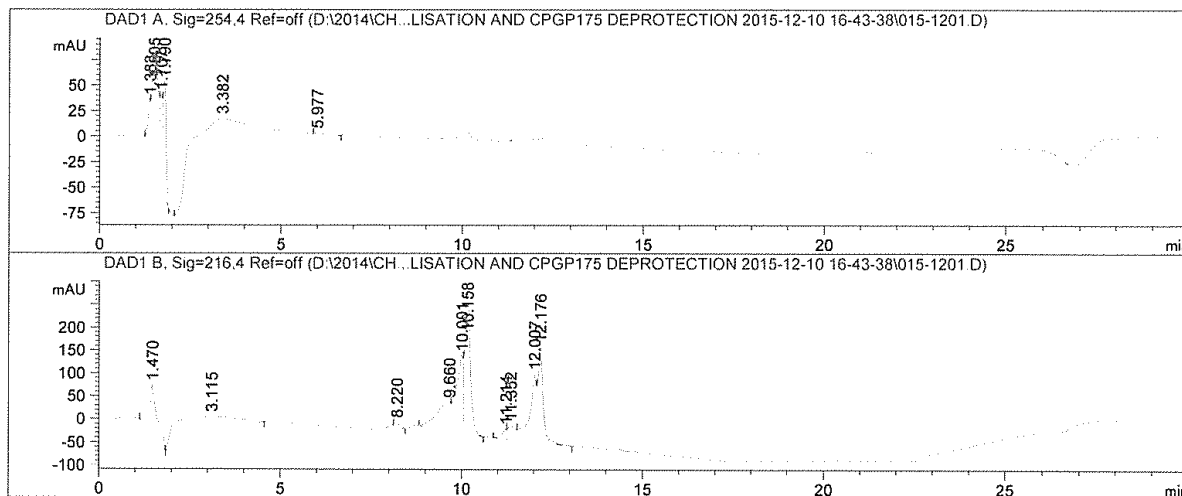

=====  
 Area Percent Report  
 =====

```

Sorted By      : Signal
Multiplier     : 1.0000
Dilution       : 1.0000
Use Multiplier & Dilution Factor with ISTDs
  
```

Signal 1: DAD1 A, Sig=254,4 Ref=off

| Peak # | RetTime [min] | Type | Width [min] | Area [mAU*s] | Height [mAU] | Area %  |
|--------|---------------|------|-------------|--------------|--------------|---------|
| 1      | 1.383         | BV   | 0.0709      | 244.92012    | 50.25099     | 1.7865  |
| 2      | 1.505         | VV   | 0.1665      | 1396.61377   | 115.94518    | 10.1869 |
| 3      | 1.707         | VV   | 0.0675      | 426.61719    | 89.64386     | 3.1118  |
| 4      | 1.790         | VB   | 0.0810      | 602.15082    | 111.55718    | 4.3921  |
| 5      | 3.382         | BV   | 1.8693      | 1.07003e4    | 72.69448     | 78.0483 |
| 6      | 5.977         | VB   | 0.3114      | 339.23999    | 13.76942     | 2.4744  |

Totals : 1.37099e4 453.86111

Data File D:\2014\CH...CYCLISATION AND CPGP175 DEPROTECTION 2015-12-10 16-43-38\016-1301.D  
 Sample Name: Pro S epi AIP I DCC T=4

```

=====
Acq. Operator   : Simi120102015           Seq. Line :   13
Acq. Instrument : LC1260                 Location  : Vial 16
Injection Date  : 12/10/2015 11:07:53 PM Inj       :    1
                                           Inj Volume: 100.000 µl
Acq. Method     : C:\CHEM32\1\DATA\DEMO\CYCLISATION AND CPGP175 DEPROTECTION 2015-12-10 16-43-38\10 TO 100 OV 15MIN 100UL.M
Last changed    : 12/10/2015 4:12:03 PM by Simi120102015
Analysis Method : D:\2014\CHRIS HPLC DATA\DATA\CYCLISATION AND CPGP175 DEPROTECTION 2015-12-10 16-43-38\10 TO 100 OV 15MIN 100UL.M (Sequence Method)
Last changed    : 3/15/2016 8:59:10 AM by SYSTEM
                 (modified after loading) (Current integration events modified)
=====
  
```

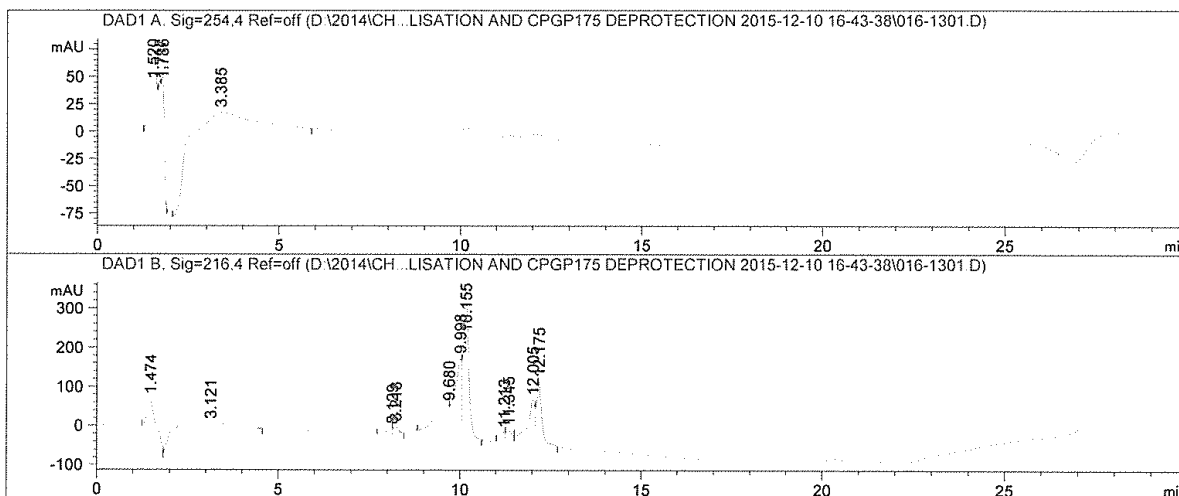

=====  
 Area Percent Report  
 =====

```

Sorted By      :      Signal
Multiplier     :      1.0000
Dilution       :      1.0000
Use Multiplier & Dilution Factor with ISTDs
  
```

Signal 1: DAD1 A, Sig=254,4 Ref=off

| Peak # | RetTime [min] | Type | Width [min] | Area [mAU*s] | Height [mAU] | Area %  |
|--------|---------------|------|-------------|--------------|--------------|---------|
| 1      | 1.520         | BV   | 0.2333      | 1617.18909   | 105.21475    | 13.8630 |
| 2      | 1.717         | VV   | 0.0656      | 458.88681    | 96.35241     | 3.9337  |
| 3      | 1.786         | VB   | 0.0777      | 563.38470    | 110.04817    | 4.8295  |
| 4      | 3.385         | BB   | 1.6803      | 9026.07324   | 67.83665     | 77.3739 |

Totals :                                    1.16655e4    379.45199

Data File D:\2014\CH...CYCLISATION AND CPGP175 DEPROTECTION 2015-12-10 16-43-38\017-1401.D  
 Sample Name: Pro S epi AIP I DCC T=5

```

=====
Acq. Operator   : Simi120102015           Seq. Line : 14
Acq. Instrument : LC1260                  Location  : Vial 17
Injection Date  : 12/10/2015 11:39:43 PM Inj       : 1
                                           Inj Volume: 100.000 µl
Acq. Method     : C:\CHEM32\1\DATA\DEMO\CYCLISATION AND CPGP175 DEPROTECTION 2015-12-10 16-43-38\10 TO 100 OV 15MIN 100UL.M
Last changed    : 12/10/2015 4:12:03 PM by Simi120102015
Analysis Method : D:\2014\CHRIS HPLC DATA\DATA\CYCLISATION AND CPGP175 DEPROTECTION 2015-12-10 16-43-38\10 TO 100 OV 15MIN 100UL.M (Sequence Method)
Last changed    : 3/15/2016 8:59:30 AM by SYSTEM
                 (modified after loading) (Current integration events modified)
=====
  
```

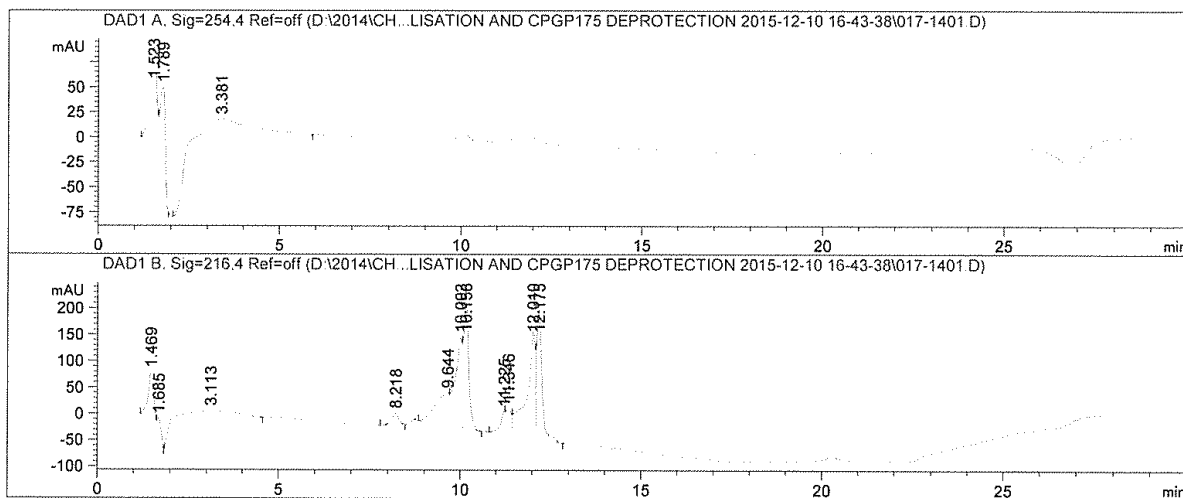

=====  
 Area Percent Report  
 =====

```

Sorted By      :      Signal
Multiplier     :      1.0000
Dilution       :      1.0000
Use Multiplier & Dilution Factor with ISTDs
  
```

Signal 1: DAD1 A, Sig=254,4 Ref=off

| Peak # | RetTime [min] | Type | Width [min] | Area [mAU*s] | Height [mAU] | Area %  |
|--------|---------------|------|-------------|--------------|--------------|---------|
| 1      | 1.523         | BV   | 0.1989      | 1762.90051   | 123.22841    | 14.6140 |
| 2      | 1.789         | VB   | 0.1296      | 1054.14795   | 110.16790    | 8.7386  |
| 3      | 3.381         | BB   | 1.6919      | 9246.08301   | 69.15031     | 76.6475 |

Totals :                                    1.20631e4    302.54662

Data File D:\2014\CH...CYCLISATION AND CPGP175 DEPROTECTION 2015-12-10 16-43-38\018-1501.D  
 Sample Name: Pro S epi AIP I DCC T=6

```

=====
Acq. Operator   : Simi120102015           Seq. Line :   15
Acq. Instrument : LC1260                 Location  : Vial 18
Injection Date  : 12/11/2015 12:11:32 AM Inj       :    1
                                           Inj Volume: 100.000 µl
Acq. Method     : C:\CHEM32\1\DATA\DEMO\CYCLISATION AND CPGP175 DEPROTECTION 2015-12-10 16-43-38\10 TO 100 OV 15MIN 100UL.M
Last changed    : 12/10/2015 4:12:03 PM by Simi120102015
Analysis Method : D:\2014\CHRIS HPLC DATA\DATA\CYCLISATION AND CPGP175 DEPROTECTION 2015-12-10 16-43-38\10 TO 100 OV 15MIN 100UL.M (Sequence Method)
Last changed    : 3/15/2016 8:59:49 AM by SYSTEM
                 (modified after loading) (Current integration events modified)
=====
  
```

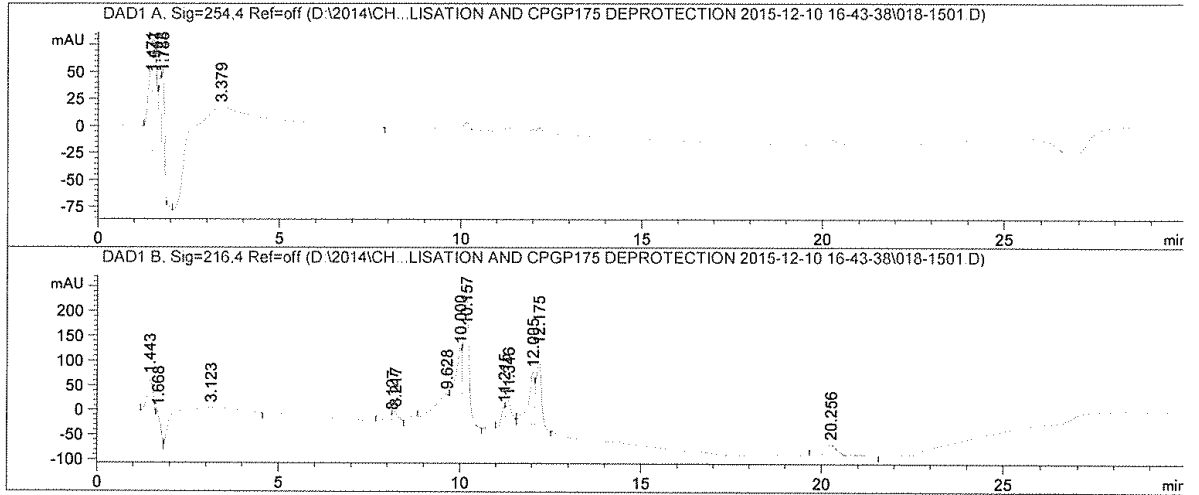

=====  
 Area Percent Report  
 =====

```

Sorted By      :      Signal
Multiplier     :      1.0000
Dilution       :      1.0000
Use Multiplier & Dilution Factor with ISTDs
  
```

Signal 1: DAD1 A, Sig=254,4 Ref=off

| Peak # | RetTime [min] | Type | Width [min] | Area [mAU*s] | Height [mAU] | Area %  |
|--------|---------------|------|-------------|--------------|--------------|---------|
| 1      | 1.471         | BV   | 0.0993      | 681.69727    | 97.83884     | 4.0274  |
| 2      | 1.547         | VV   | 0.1129      | 899.30505    | 110.54456    | 5.3130  |
| 3      | 1.722         | VV   | 0.0726      | 485.67072    | 96.73171     | 2.8693  |
| 4      | 1.785         | VB   | 0.0773      | 558.99750    | 109.97053    | 3.3025  |
| 5      | 3.379         | BB   | 2.2864      | 1.43009e4    | 78.24427     | 84.4879 |

Totals :                                    1.69266e4    493.32991



Data File D:\2014\CH...CYCLISATION AND CPGP175 DEPROTECTION 2015-12-10 16-43-38\019-1601.D  
 Sample Name: Pro S epi AIP I DCC T=7

```

=====
Acq. Operator   : Simi120102015           Seq. Line : 16
Acq. Instrument : LC1260                 Location  : Vial 19
Injection Date  : 12/11/2015 12:43:22 AM Inj       : 1
                                           Inj Volume: 100.000 µl
Acq. Method    : C:\CHEM32\1\DATA\DEMO\CYCLISATION AND CPGP175 DEPROTECTION 2015-12-10 16-43-38\10 TO 100 OV 15MIN 100UL.M
Last changed   : 12/10/2015 4:12:03 PM by Simi120102015
Analysis Method: D:\2014\CHRIS HPLC DATA\DATA\CYCLISATION AND CPGP175 DEPROTECTION 2015-12-10 16-43-38\10 TO 100 OV 15MIN 100UL.M (Sequence Method)
Last changed   : 3/15/2016 9:00:07 AM by SYSTEM
                (modified after loading) (Current integration events modified)
=====
  
```

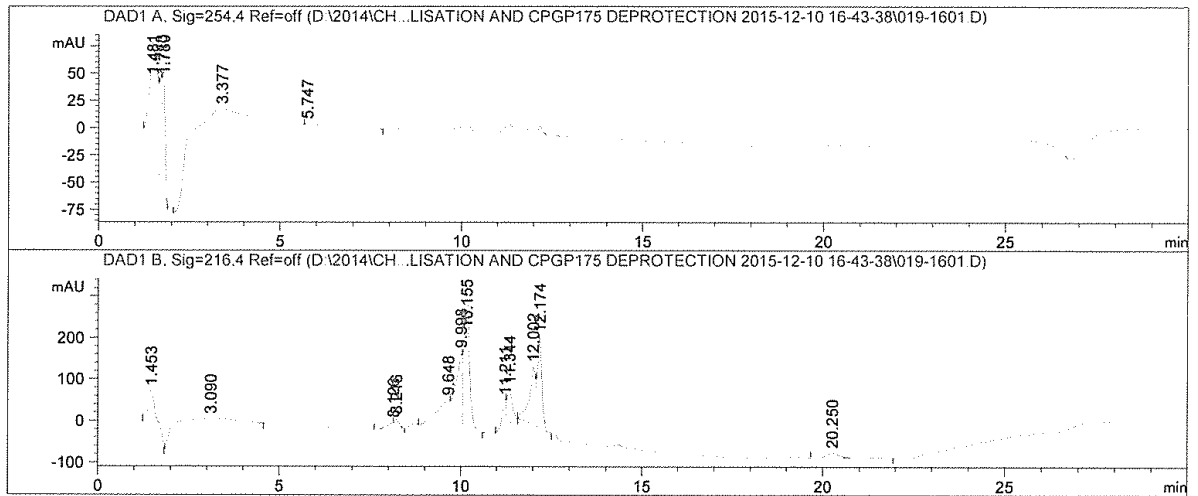

Area Percent Report

```

Sorted By      : Signal
Multiplier     : 1.0000
Dilution       : 1.0000
Use Multiplier & Dilution Factor with ISTDs
  
```

Signal 1: DAD1 A, Sig=254,4 Ref=off

| Peak # | RetTime [min] | Type | Width [min] | Area [mAU*s] | Height [mAU] | Area %  |
|--------|---------------|------|-------------|--------------|--------------|---------|
| 1      | 1.481         | BV   | 0.2182      | 1690.13171   | 103.69606    | 10.0486 |
| 2      | 1.713         | VV   | 0.0649      | 446.71085    | 98.53292     | 2.6559  |
| 3      | 1.780         | VB   | 0.0781      | 570.95282    | 110.74967    | 3.3946  |
| 4      | 3.377         | BV   | 1.9284      | 1.19976e4    | 78.00579     | 71.3311 |
| 5      | 5.747         | VB   | 0.7814      | 2114.18994   | 32.47945     | 12.5698 |

Totals : 1.68196e4 423.46389

Data File D:\2014\CH...CYCLISATION AND CPGP175 DEPROTECTION 2015-12-10 16-43-38\020-1701.D  
 Sample Name: Pro S epi AIP I DCC T=8

```

=====
Acq. Operator   : Simi120102015           Seq. Line : 17
Acq. Instrument : LC1260                 Location  : Vial 20
Injection Date  : 12/11/2015 1:15:13 AM   Inj       : 1
                                           Inj Volume: 100.000 µl
Acq. Method     : C:\CHEM32\1\DATA\DEMO\CYCLISATION AND CPGP175 DEPROTECTION 2015-12-10 16-43-38\10 TO 100 OV 15MIN 100UL.M
Last changed    : 12/10/2015 4:12:03 PM by Simi120102015
Analysis Method : D:\2014\CHRIS HPLC DATA\DATA\CYCLISATION AND CPGP175 DEPROTECTION 2015-12-10 16-43-38\10 TO 100 OV 15MIN 100UL.M (Sequence Method)
Last changed    : 3/15/2016 9:00:24 AM by SYSTEM
                 (modified after loading) (Current integration events modified)
=====
  
```

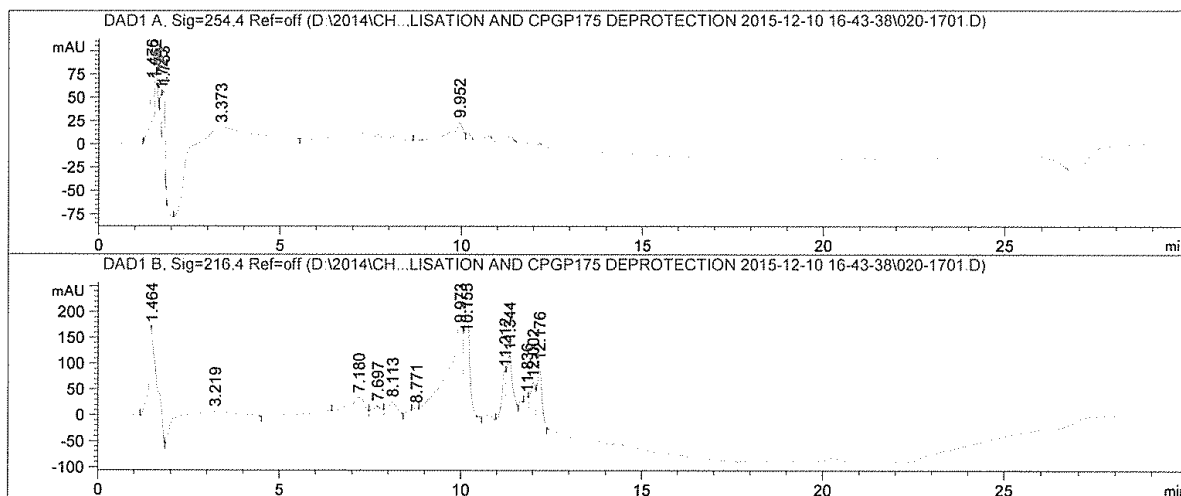

=====  
 Area Percent Report  
 =====

```

Sorted By      : Signal
Multiplier     : 1.0000
Dilution      : 1.0000
Use Multiplier & Dilution Factor with ISTDs
  
```

Signal 1: DAD1 A, Sig=254,4 Ref=off

| Peak # | RetTime [min] | Type | Width [min] | Area [mAU*s] | Height [mAU] | Area %  |
|--------|---------------|------|-------------|--------------|--------------|---------|
| 1      | 1.476         | BV   | 0.0982      | 542.02014    | 78.81866     | 5.5760  |
| 2      | 1.562         | VB   | 0.0616      | 213.40388    | 52.32769     | 2.1954  |
| 3      | 1.725         | BV   | 0.0496      | 125.30008    | 38.83519     | 1.2890  |
| 4      | 1.783         | VB   | 0.0742      | 346.05554    | 71.82365     | 3.5600  |
| 5      | 3.373         | BB   | 1.5965      | 8039.54834   | 64.57506     | 82.7063 |
| 6      | 9.952         | BV   | 0.3204      | 454.26746    | 18.37459     | 4.6732  |

Totals :                                    9720.59544    324.75485

Data File D:\2014\CH...CYCLISATION AND CPGP175 DEPROTECTION 2015-12-10 16-43-38\022-1901.D  
 Sample Name: Pro S epi AIP I PS CD T=1

```

=====
Acq. Operator   : Simi120102015           Seq. Line : 19
Acq. Instrument : LC1260                   Location  : Vial 22
Injection Date  : 12/11/2015 2:18:53 AM    Inj       : 1
                                           Inj Volume: 100.000 µl

Acq. Method    : C:\CHEM32\1\DATA\DEMO\CYCLISATION AND CPGP175 DEPROTECTION 2015-12-10 16-43-38\10 TO 100 OV 15MIN 100UL.M
Last changed   : 12/10/2015 4:12:03 PM by Simi120102015
Analysis Method : D:\2014\CHRIS HPLC DATA\DATA\CYCLISATION AND CPGP175 DEPROTECTION 2015-12-10 16-43-38\10 TO 100 OV 15MIN 100UL.M (Sequence Method)
Last changed   : 3/15/2016 9:01:02 AM by SYSTEM
                (modified after loading) (Current integration events modified)
=====
  
```

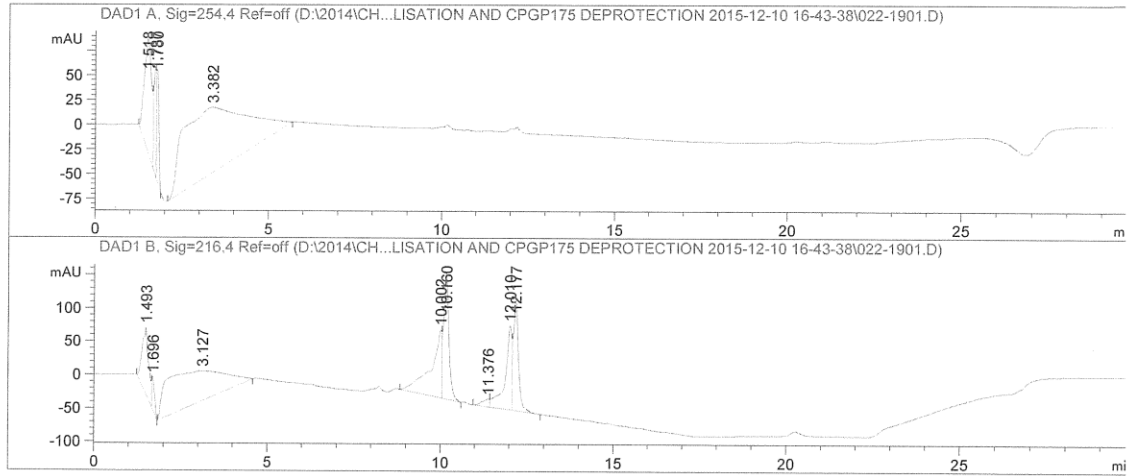

=====  
 Area Percent Report  
 =====

```

Sorted By      :      Signal
Multiplier     :      1.0000
Dilution       :      1.0000
Use Multiplier & Dilution Factor with ISTDs
  
```

Signal 1: DAD1 A, Sig=254,4 Ref=off

| Peak # | RetTime [min] | Type | Width [min] | Area [mAU*s] | Height [mAU] | Area %  |
|--------|---------------|------|-------------|--------------|--------------|---------|
| 1      | 1.518         | BV   | 0.2002      | 1660.21387   | 115.15921    | 14.8509 |
| 2      | 1.737         | VV   | 0.0725      | 563.58258    | 108.64600    | 5.0414  |
| 3      | 1.780         | VB   | 0.0681      | 481.81845    | 112.27672    | 4.3100  |
| 4      | 3.382         | BB   | 1.6321      | 8473.57813   | 66.16603     | 75.7978 |

Totals :                                    1.11792e4    402.24796

Data File D:\2014\CH...CYCLISATION AND CPGP175 DEPROTECTION 2015-12-10 16-43-38\023-2001.D  
 Sample Name: Pro S epi AIP I PS CD T=2

```

=====
Acq. Operator   : Simi120102015           Seq. Line : 20
Acq. Instrument : LC1260                  Location  : Vial 23
Injection Date  : 12/11/2015 2:50:43 AM   Inj       : 1
                                           Inj Volume: 100.000 µl

Acq. Method    : C:\CHEM32\1\DATA\DEMO\CYCLISATION AND CPGP175 DEPROTECTION 2015-12-10 16-43-38\10 TO 100 OV 15MIN 100UL.M

Last changed   : 12/10/2015 4:12:03 PM by Simi120102015
Analysis Method : D:\2014\CHRIS HPLC DATA\DATA\CYCLISATION AND CPGP175 DEPROTECTION 2015-12-10 16-43-38\10 TO 100 OV 15MIN 100UL.M (Sequence Method)

Last changed   : 3/15/2016 9:01:22 AM by SYSTEM
                (modified after loading) (Current integration events modified)
=====
  
```

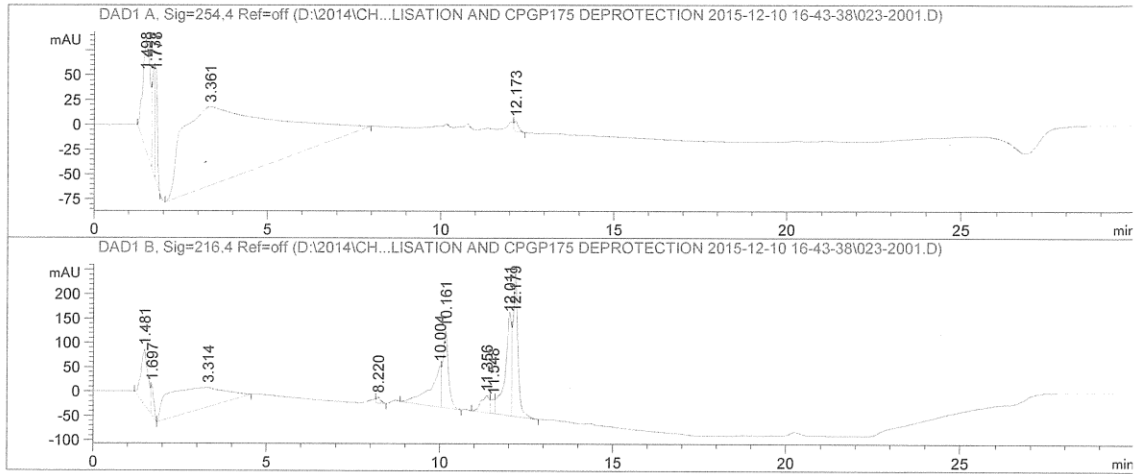

=====  
 Area Percent Report  
 =====

```

Sorted By      : Signal
Multiplier     : 1.0000
Dilution      : 1.0000
Use Multiplier & Dilution Factor with ISTDs
  
```

Signal 1: DAD1 A, Sig=254,4 Ref=off

| Peak # | RetTime [min] | Type | Width [min] | Area [mAU*s] | Height [mAU] | Area %  |
|--------|---------------|------|-------------|--------------|--------------|---------|
| 1      | 1.498         | BV   | 0.1840      | 1647.77673   | 111.78018    | 9.5032  |
| 2      | 1.737         | VV   | 0.0730      | 566.62054    | 108.45362    | 3.2679  |
| 3      | 1.778         | VB   | 0.0722      | 527.20453    | 113.49354    | 3.0405  |
| 4      | 3.361         | BB   | 2.2568      | 1.45051e4    | 79.12041     | 83.6548 |
| 5      | 12.173        | VB   | 0.1251      | 92.52731     | 10.68017     | 0.5336  |

Totals : 1.73392e4 423.52793

```

=====
Acq. Operator   : Simi120102015           Seq. Line : 21
Acq. Instrument : LC1260                 Location  : Vial 24
Injection Date  : 12/11/2015 3:22:32 AM   Inj       : 1
                                           Inj Volume: 100.000 µl

Acq. Method     : C:\CHEM32\1\DATA\DEMO\CYCLISATION AND CPGP175 DEPROTECTION 2015-12-10 16-43-38\10 TO 100 OV 15MIN 100UL.M

Last changed    : 12/10/2015 4:12:03 PM by Simi120102015
Analysis Method : D:\2014\CHRIS HPLC DATA\DATA\CYCLISATION AND CPGP175 DEPROTECTION 2015-12-10 16-43-38\10 TO 100 OV 15MIN 100UL.M (Sequence Method)

Last changed    : 3/15/2016 9:01:42 AM by SYSTEM
                 (modified after loading) (Current integration events modified)
=====
  
```

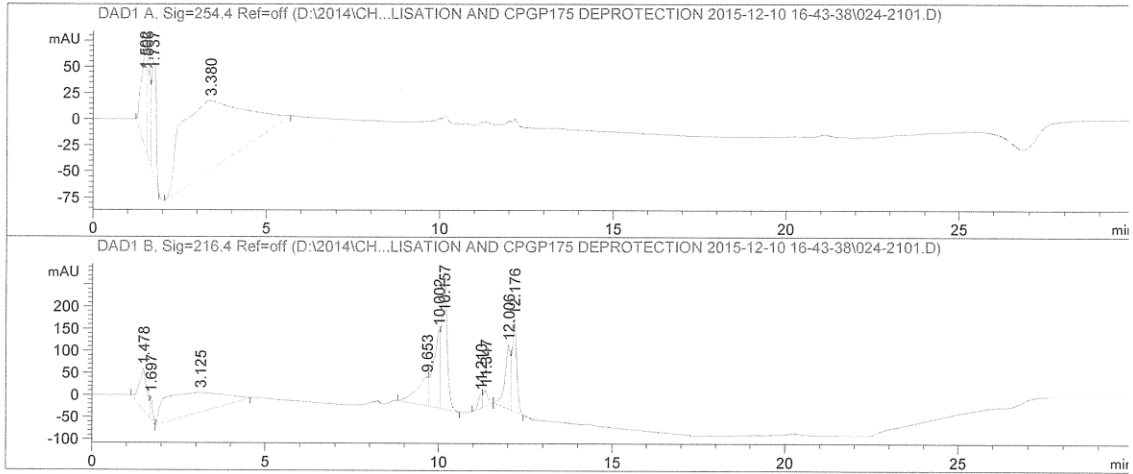

=====  
 Area Percent Report  
 =====

```

Sorted By      :      Signal
Multiplier     :      1.0000
Dilution       :      1.0000
Use Multiplier & Dilution Factor with ISTDs
  
```

Signal 1: DAD1 A, Sig=254,4 Ref=off

| Peak # | RetTime [min] | Type | Width [min] | Area [mAU*s] | Height [mAU] | Area %  |
|--------|---------------|------|-------------|--------------|--------------|---------|
| 1      | 1.502         | BV   | 0.1311      | 1050.07764   | 104.61230    | 9.3340  |
| 2      | 1.566         | VV   | 0.0897      | 635.97784    | 100.64491    | 5.6531  |
| 3      | 1.737         | VB   | 0.1224      | 1004.64984   | 108.08659    | 8.9302  |
| 4      | 3.380         | BB   | 1.6486      | 8559.33203   | 66.45619     | 76.0827 |

Totals :                                    1.12500e4    379.79998

```

=====
Acq. Operator   : Simi120102015           Seq. Line : 22
Acq. Instrument : LC1260                   Location  : Vial 25
Injection Date  : 12/11/2015 3:54:22 AM    Inj       : 1
                                           Inj Volume: 100.000 µl

Acq. Method     : C:\CHEM32\1\DATA\DEMO\CYCLISATION AND CPGP175 DEPROTECTION 2015-12-10 16-43-38\10 TO 100 OV 15MIN 100UL.M

Last changed    : 12/10/2015 4:12:03 PM by Simi120102015
Analysis Method : D:\2014\CHRIS HPLC DATA\DATA\CYCLISATION AND CPGP175 DEPROTECTION 2015-12-10 16-43-38\10 TO 100 OV 15MIN 100UL.M (Sequence Method)

Last changed    : 3/15/2016 9:02:00 AM by SYSTEM
                 (modified after loading) (Current integration events modified)
=====
  
```

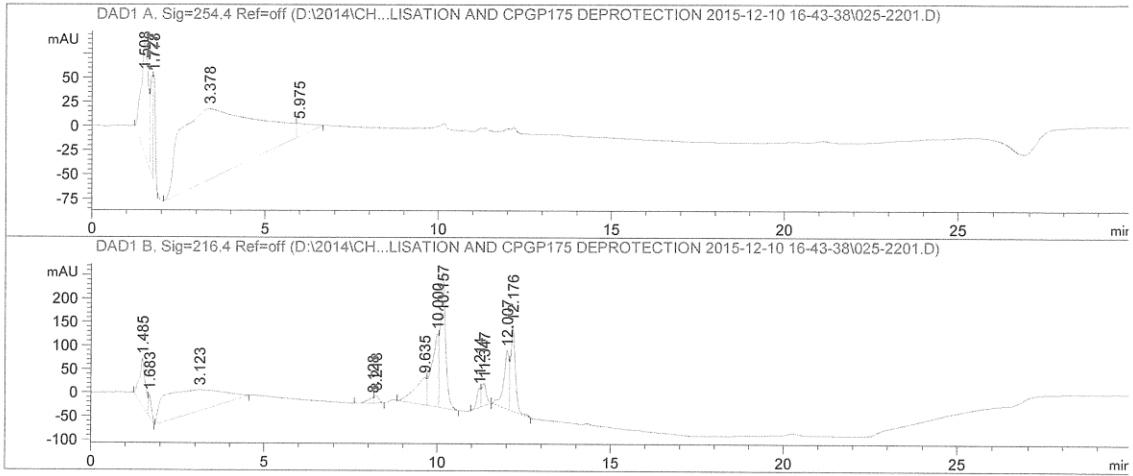

=====  
 Area Percent Report  
 =====

```

Sorted By      :      Signal
Multiplier     :      1.0000
Dilution       :      1.0000
Use Multiplier & Dilution Factor with ISTDs
  
```

Signal 1: DAD1 A, Sig=254,4 Ref=off

| Peak #   | RetTime [min] | Type | Width [min] | Area [mAU*s] | Height [mAU] | Area %  |
|----------|---------------|------|-------------|--------------|--------------|---------|
| 1        | 1.508         | BV   | 0.1835      | 1661.88477   | 118.54943    | 12.0587 |
| 2        | 1.727         | VV   | 0.0705      | 520.62689    | 103.85775    | 3.7777  |
| 3        | 1.778         | VB   | 0.0699      | 504.38531    | 109.18156    | 3.6598  |
| 4        | 3.378         | BV   | 1.8522      | 1.07563e4    | 73.11949     | 78.0479 |
| 5        | 5.975         | VB   | 0.3093      | 338.46811    | 13.74439     | 2.4559  |
| Totals : |               |      |             | 1.37816e4    | 418.45262    |         |

Data File D:\2014\CH...CYCLISATION AND CPGP175 DEPROTECTION 2015-12-10 16-43-38\026-2301.D  
 Sample Name: Pro S epi AIP I PS CD T=5

```

=====
Acq. Operator   : Simi120102015           Seq. Line :   23
Acq. Instrument : LC1260                 Location  : Vial 26
Injection Date  : 12/11/2015 4:26:12 AM   Inj       :    1
                                           Inj Volume: 100.000 µl

Acq. Method    : C:\CHEM32\1\DATA\DEMO\CYCLISATION AND CPGP175 DEPROTECTION 2015-12-10 16-43-38\10 TO 100 OV 15MIN 100UL.M

Last changed   : 12/10/2015 4:12:03 PM by Simi120102015
Analysis Method : D:\2014\CHRIS HPLC DATA\DATA\CYCLISATION AND CPGP175 DEPROTECTION 2015-12-10 16-43-38\10 TO 100 OV 15MIN 100UL.M (Sequence Method)

Last changed   : 3/15/2016 9:02:17 AM by SYSTEM
                (modified after loading) (Current integration events modified)
=====
  
```

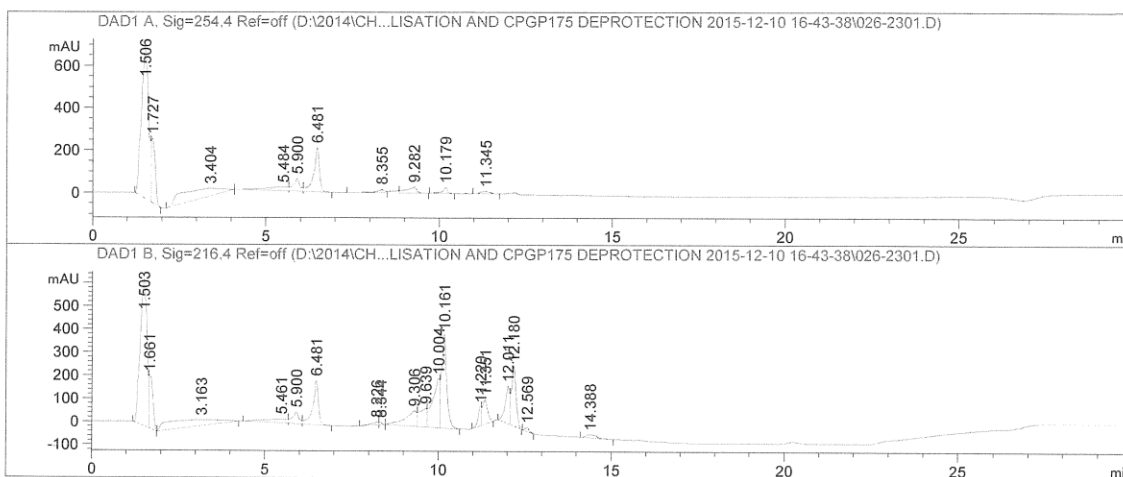

=====  
 Area Percent Report  
 =====

```

Sorted By      :      Signal
Multiplier     :      1.0000
Dilution       :      1.0000
Use Multiplier & Dilution Factor with ISTDs
  
```

Signal 1: DAD1 A, Sig=254,4 Ref=off

| Peak # | RetTime [min] | Type | Width [min] | Area [mAU*s] | Height [mAU] | Area %  |
|--------|---------------|------|-------------|--------------|--------------|---------|
| 1      | 1.506         | BV   | 0.1808      | 1.02451e4    | 716.78851    | 47.5757 |
| 2      | 1.727         | VB   | 0.1219      | 2299.40771   | 305.07468    | 10.6779 |
| 3      | 3.404         | BB   | 1.3687      | 3721.28955   | 35.33350     | 17.2807 |
| 4      | 5.484         | BV   | 0.5729      | 796.08685    | 17.83087     | 3.6968  |
| 5      | 5.900         | VV   | 0.1798      | 776.93054    | 58.92851     | 3.6079  |
| 6      | 6.481         | VB   | 0.1603      | 2397.76270   | 208.35289    | 11.1346 |
| 7      | 8.355         | BV   | 0.2192      | 260.92456    | 15.43838     | 1.2117  |
| 8      | 9.282         | VB   | 0.2590      | 549.01959    | 27.49500     | 2.5495  |
| 9      | 10.179        | BB   | 0.1373      | 273.00604    | 27.62776     | 1.2678  |
| 10     | 11.345        | BB   | 0.2537      | 214.80388    | 11.10468     | 0.9975  |

Data File D:\2014\CH...CYCLISATION AND CPGP175 DEPROTECTION 2015-12-10 16-43-38\027-2401.D  
 Sample Name: Pro S epi AIP I PS CD T=6

```

=====
Acq. Operator   : Simi120102015           Seq. Line : 24
Acq. Instrument : LC1260                  Location  : Vial 27
Injection Date  : 12/11/2015 4:58:02 AM   Inj       : 1
                                           Inj Volume: 100.000 µl

Acq. Method    : C:\CHEM32\1\DATA\DEMO\CYCLISATION AND CPGP175 DEPROTECTION 2015-12-10 16-43-38\10 TO 100 OV 15MIN 100UL.M

Last changed   : 12/10/2015 4:12:03 PM by Simi120102015
Analysis Method : D:\2014\CHRIS HPLC DATA\DATA\CYCLISATION AND CPGP175 DEPROTECTION 2015-12-10 16-43-38\10 TO 100 OV 15MIN 100UL.M (Sequence Method)

Last changed   : 3/15/2016 9:02:33 AM by SYSTEM
                (modified after loading) (Current integration events modified)
=====
  
```

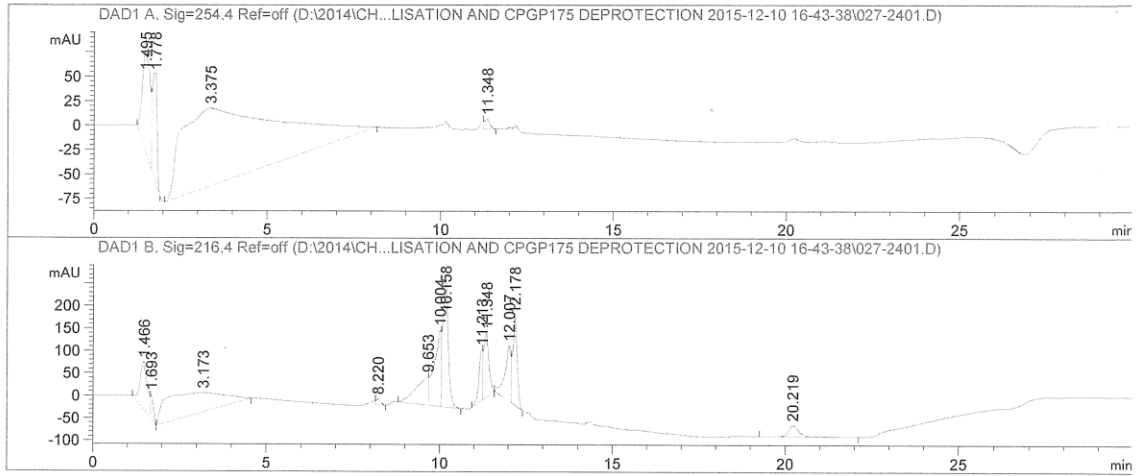

=====  
 Area Percent Report  
 =====

```

Sorted By      : Signal
Multiplier     : 1.0000
Dilution      : 1.0000
Use Multiplier & Dilution Factor with ISTDs
  
```

Signal 1: DAD1 A, Sig=254,4 Ref=off

| Peak #   | RetTime [min] | Type | Width [min] | Area [mAU*s] | Height [mAU] | Area %  |
|----------|---------------|------|-------------|--------------|--------------|---------|
| 1        | 1.495         | BV   | 0.1857      | 1662.95837   | 114.31179    | 9.3171  |
| 2        | 1.778         | VB   | 0.1266      | 1034.69458   | 111.17526    | 5.7971  |
| 3        | 3.375         | BB   | 2.3414      | 1.50364e4    | 79.54213     | 84.2445 |
| 4        | 11.348        | VB   | 0.1491      | 114.46119    | 10.84628     | 0.6413  |
| Totals : |               |      |             | 1.78485e4    | 315.87546    |         |



Data File D:\2014\CH...CYCLISATION AND CPGP175 DEPROTECTION 2015-12-10 16-43-38\028-2501.D  
 Sample Name: Pro S epi AIP I PS CD T=7

```

=====
Acq. Operator   : Simi120102015           Seq. Line : 25
Acq. Instrument : LC1260                   Location  : Vial 28
Injection Date  : 12/11/2015 5:29:51 AM   Inj       : 1
                                           Inj Volume: 100.000 µl

Acq. Method     : C:\CHEM32\1\DATA\DEMO\CYCLISATION AND CPGP175 DEPROTECTION 2015-12-10 16-43-38\10 TO 100 OV 15MIN 100UL.M

Last changed    : 12/10/2015 4:12:03 PM by Simi120102015
Analysis Method : D:\2014\CHRIS HPLC DATA\DATA\CYCLISATION AND CPGP175 DEPROTECTION 2015-12-10 16-43-38\10 TO 100 OV 15MIN 100UL.M (Sequence Method)

Last changed    : 3/15/2016 9:02:52 AM by SYSTEM
                 (modified after loading) (Current integration events modified)
=====
  
```

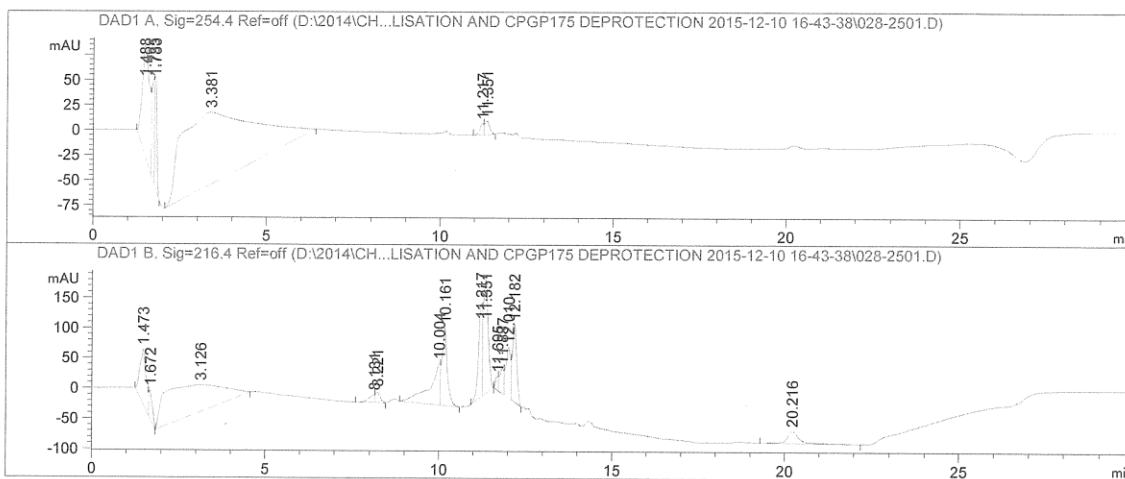

=====  
 Area Percent Report  
 =====

```

Sorted By      :      Signal
Multiplier     :      1.0000
Dilution       :      1.0000
Use Multiplier & Dilution Factor with ISTDs
  
```

Signal 1: DAD1 A, Sig=254,4 Ref=off

| Peak # | RetTime [min] | Type | Width [min] | Area [mAU*s] | Height [mAU] | Area %  |
|--------|---------------|------|-------------|--------------|--------------|---------|
| 1      | 1.488         | BV   | 0.2075      | 1636.97119   | 108.82732    | 12.2968 |
| 2      | 1.735         | VV   | 0.0668      | 479.67804    | 102.20838    | 3.6033  |
| 3      | 1.783         | VB   | 0.0751      | 540.25592    | 110.29816    | 4.0584  |
| 4      | 3.381         | BB   | 1.8424      | 1.04387e4    | 71.62056     | 78.4150 |
| 5      | 11.217        | BV   | 0.1113      | 83.07583     | 11.10474     | 0.6241  |
| 6      | 11.351        | VB   | 0.1407      | 133.44598    | 13.57142     | 1.0024  |

Totals :                                    1.33122e4    417.63059

Data File D:\2014\CH...CYCLISATION AND CPGP175 DEPROTECTION 2015-12-10 16-43-38\029-2601.D  
 Sample Name: Pro S epi AIP I PS CD T=8

```

=====
Acq. Operator   : Simi120102015           Seq. Line : 26
Acq. Instrument : LC1260                 Location  : Vial 29
Injection Date  : 12/11/2015 6:01:45 AM   Inj       : 1
                                           Inj Volume: 100.000 µl

Acq. Method     : C:\CHEM32\1\DATA\DEMO\CYCLISATION AND CPGP175 DEPROTECTION 2015-12-10 16-43-38\10 TO 100 OV 15MIN 100UL.M

Last changed    : 12/10/2015 4:12:03 PM by Simi120102015
Analysis Method : D:\2014\CHRIS HPLC DATA\DATA\CYCLISATION AND CPGP175 DEPROTECTION 2015-12-10 16-43-38\10 TO 100 OV 15MIN 100UL.M (Sequence Method)

Last changed    : 3/15/2016 9:03:09 AM by SYSTEM
                 (modified after loading) (Current integration events modified)
=====
  
```

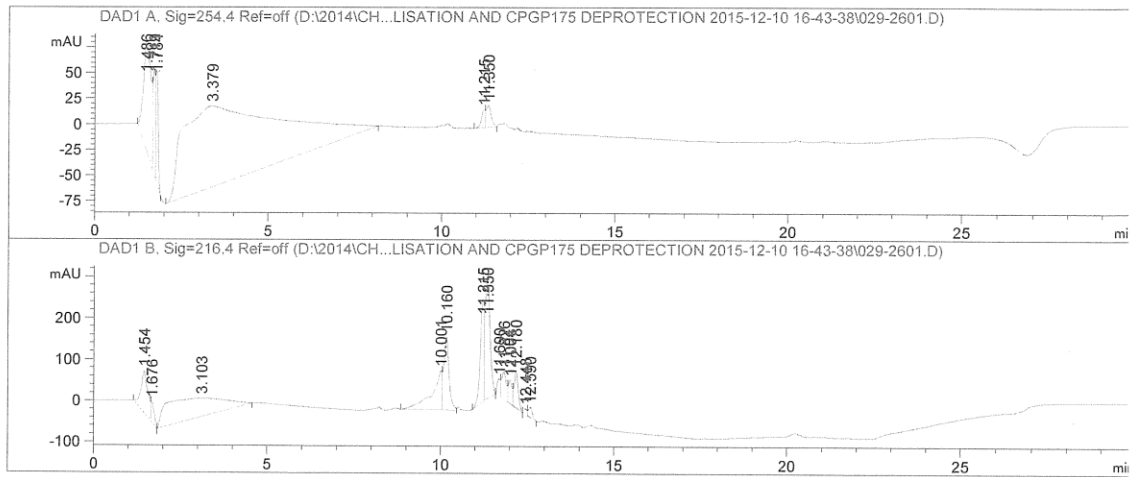

=====  
 Area Percent Report  
 =====

```

Sorted By      :      Signal
Multiplier     :      1.0000
Dilution       :      1.0000
Use Multiplier & Dilution Factor with ISTDs
  
```

Signal 1: DAD1 A, Sig=254,4 Ref=off

| Peak # | RetTime [min] | Type | Width [min] | Area [mAU*s] | Height [mAU] | Area %  |
|--------|---------------|------|-------------|--------------|--------------|---------|
| 1      | 1.486         | BV   | 0.2108      | 1617.18762   | 106.70644    | 8.9874  |
| 2      | 1.719         | VV   | 0.0746      | 552.19513    | 102.85656    | 3.0688  |
| 3      | 1.784         | VB   | 0.0738      | 525.49359    | 109.88778    | 2.9204  |
| 4      | 3.379         | BB   | 2.3545      | 1.49545e4    | 78.99718     | 83.1089 |
| 5      | 11.215        | BV   | 0.1124      | 133.09993    | 17.57053     | 0.7397  |
| 6      | 11.350        | VB   | 0.1385      | 211.38432    | 21.54458     | 1.1748  |

Totals :                                    1.79939e4    437.56308

Data File D:\2014\CH...CYCLISATION AND CPGP175 DEPROTECTION 2015-12-10 16-43-38\030-2701.D  
 Sample Name: Pro S epi AIP I PS CD 2 days

```

=====
Acq. Operator   : Simi120102015           Seq. Line : 27
Acq. Instrument : LC1260                   Location  : Vial 30
Injection Date  : 12/11/2015 6:33:35 AM   Inj       : 1
                                           Inj Volume: 100.000 µl

Acq. Method     : C:\CHEM32\1\DATA\DEMO\CYCLISATION AND CPGP175 DEPROTECTION 2015-12-10 16-43-38\10 TO 100 OV 15MIN 100UL.M
Last changed    : 12/10/2015 4:12:03 PM by Simi120102015
Analysis Method : D:\2014\CHRIS HPLC DATA\DATA\CYCLISATION AND CPGP175 DEPROTECTION 2015-12-10 16-43-38\10 TO 100 OV 15MIN 100UL.M (Sequence Method)
Last changed    : 3/15/2016 9:03:26 AM by SYSTEM
                 (modified after loading) (Current integration events modified)
=====
  
```

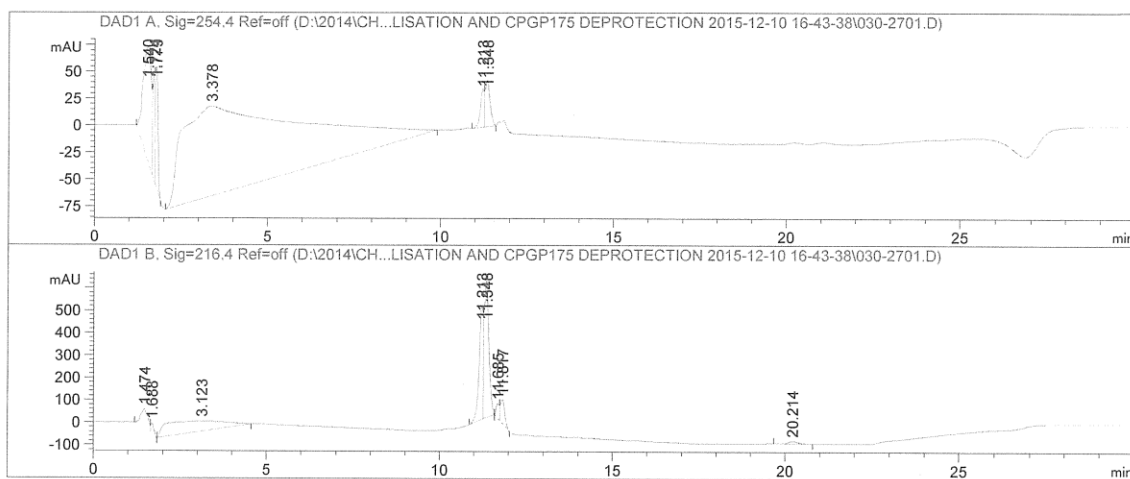

=====  
 Area Percent Report  
 =====

```

Sorted By      : Signal
Multiplier     : 1.0000
Dilution       : 1.0000
Use Multiplier & Dilution Factor with ISTDs
  
```

Signal 1: DAD1 A, Sig=254,4 Ref=off

| Peak # | RetTime [min] | Type | Width [min] | Area [mAU*s] | Height [mAU] | Area %  |
|--------|---------------|------|-------------|--------------|--------------|---------|
| 1      | 1.540         | BV   | 0.2209      | 1739.51306   | 106.29937    | 7.6243  |
| 2      | 1.724         | VV   | 0.0623      | 440.05896    | 102.06106    | 1.9288  |
| 3      | 1.779         | VB   | 0.0763      | 559.52161    | 111.87844    | 2.4524  |
| 4      | 3.378         | BB   | 2.8608      | 1.93695e4    | 83.17658     | 84.8968 |
| 5      | 11.213        | BV   | 0.1146      | 276.97739    | 35.68401     | 1.2140  |
| 6      | 11.348        | VB   | 0.1390      | 429.76346    | 43.58271     | 1.8837  |

Totals :                                    2.28153e4    482.68216

Data File D:\2014\CH...C DATA\DATA\CYCLISATION TIME COURSES 2015-12-09 08-41-41\022-2201.D  
 Sample Name: Pro S epi AIP I PS CD T=1

```

=====
Acq. Operator   : Simi120102015           Seq. Line : 22
Acq. Instrument : LC1260                 Location  : Vial 22
Injection Date  : 12/9/2015 5:56:48 PM   Inj       : 1
                                           Inj Volume: 50.000 µl

Acq. Method     : C:\CHEM32\1\DATA\DEMO\CYCLISATION TIME COURSES 2015-12-09 08-41-41\10 TO
                  100 OV 15MIN 50UL.M
Last changed    : 12/9/2015 8:34:52 AM by Simi120102015
Analysis Method : D:\2014\CHRIS HPLC DATA\DATA\CYCLISATION TIME COURSES 2015-12-09 08-41-41
                  \10 TO 100 OV 15MIN 50UL.M (Sequence Method)
Last changed    : 12/9/2015 8:34:52 AM by Simi120102015
=====
  
```

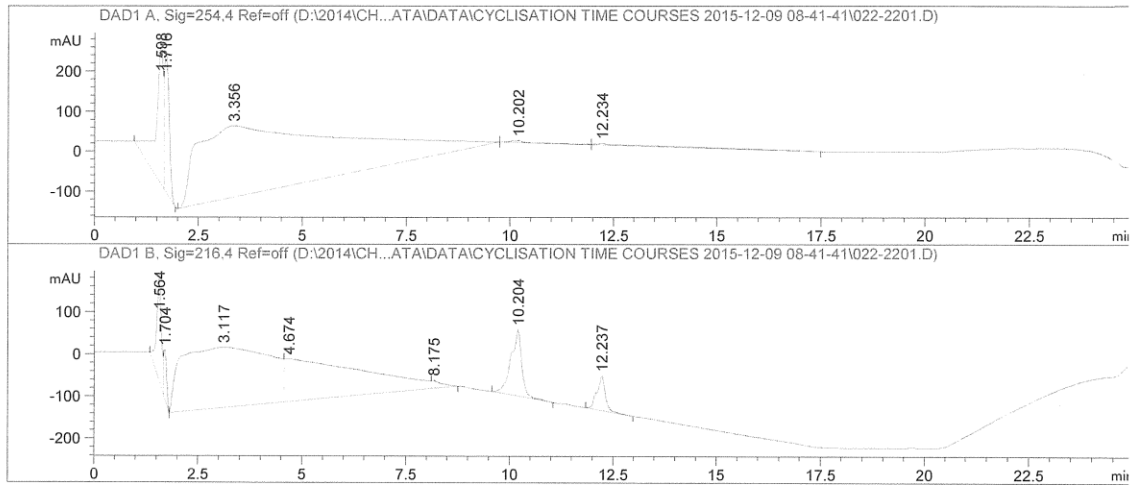

=====  
 Area Percent Report  
 =====

```

Sorted By      : Signal
Multiplier     : 1.0000
Dilution       : 1.0000
Use Multiplier & Dilution Factor with ISTDs
  
```

Signal 1: DAD1 A, Sig=254,4 Ref=off

| Peak # | RetTime [min] | Type | Width [min] | Area [mAU*s] | Height [mAU] | Area %  |
|--------|---------------|------|-------------|--------------|--------------|---------|
| 1      | 1.598         | BV   | 0.1721      | 4475.40674   | 357.39114    | 9.0291  |
| 2      | 1.716         | VB   | 0.1296      | 2861.49512   | 349.05670    | 5.7731  |
| 3      | 3.356         | BB   | 2.8882      | 4.14808e4    | 177.38484    | 83.6873 |
| 4      | 10.202        | BV   | 0.4864      | 177.58722    | 4.52004      | 0.3583  |
| 5      | 12.234        | VB   | 1.5600      | 571.15106    | 4.34961      | 1.1523  |

Totals : 4.95664e4 892.70234

Data File D:\2014\CH...C DATA\DATA\CYCLISATION TIME COURSES 2015-12-09 08-41-41\023-2301.D  
 Sample Name: Pro S epi AIP I PS CD T=2

```

=====
Acq. Operator   : Simi120102015           Seq. Line : 23
Acq. Instrument : LC1260                  Location  : Vial 23
Injection Date  : 12/9/2015 6:23:10 PM    Inj       : 1
                                           Inj Volume: 50.000 µl
Acq. Method     : C:\CHEM32\1\DATA\DEMO\CYCLISATION TIME COURSES 2015-12-09 08-41-41\10 TO
100 OV 15MIN 50UL.M
Last changed    : 12/9/2015 8:34:52 AM by Simi120102015
Analysis Method : D:\2014\CHRIS HPLC DATA\DATA\CYCLISATION TIME COURSES 2015-12-09 08-41-41
\10 TO 100 OV 15MIN 50UL.M (Sequence Method)
Last changed    : 12/9/2015 8:34:52 AM by Simi120102015
=====
  
```

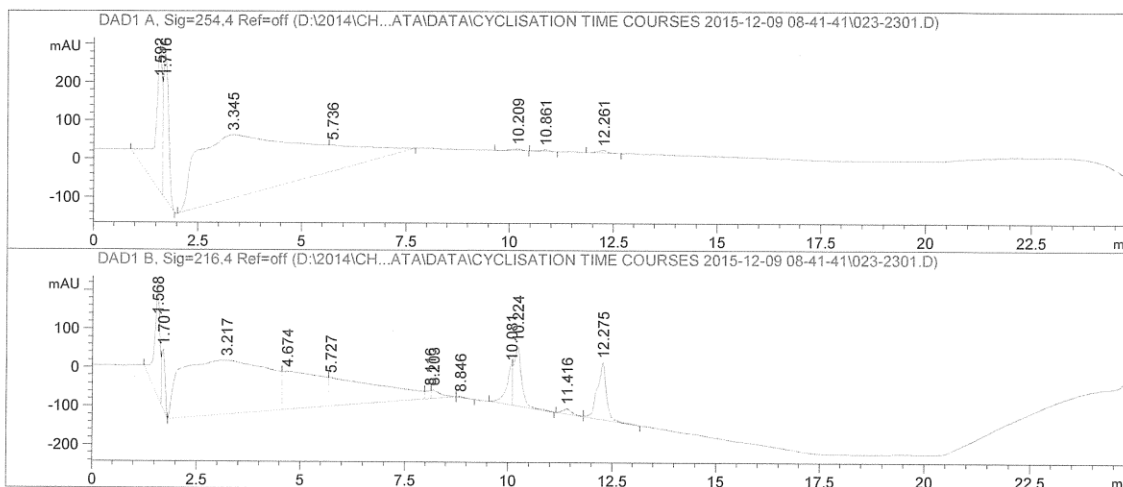

=====  
 Area Percent Report  
 =====

```

Sorted By      : Signal
Multiplier     : 1.0000
Dilution       : 1.0000
Use Multiplier & Dilution Factor with ISTDs
  
```

Signal 1: DAD1 A, Sig=254,4 Ref=off

| Peak # | RetTime [min] | Type | Width [min] | Area [mAU*s] | Height [mAU] | Area %  |
|--------|---------------|------|-------------|--------------|--------------|---------|
| 1      | 1.592         | BV   | 0.1710      | 4785.58105   | 379.84222    | 12.4461 |
| 2      | 1.716         | VB   | 0.1278      | 3116.48901   | 379.48575    | 8.1052  |
| 3      | 3.345         | BV   | 1.9716      | 2.60660e4    | 166.57294    | 67.7914 |
| 4      | 5.736         | VB   | 0.7355      | 4221.63525   | 68.64129     | 10.9795 |
| 5      | 10.209        | BB   | 0.2575      | 86.80096     | 4.65526      | 0.2257  |
| 6      | 10.861        | BB   | 0.2216      | 62.66041     | 3.98249      | 0.1630  |
| 7      | 12.261        | BB   | 0.2353      | 111.13319    | 6.70899      | 0.2890  |

Totals : 3.84503e4 1009.88894

Sample Name: Pro S epi AIP I PS CD T=3

```

=====
Acq. Operator   : Simi120102015           Seq. Line : 24
Acq. Instrument : LC1260                  Location  : Vial 24
Injection Date  : 12/9/2015 6:49:33 PM    Inj       : 1
                                           Inj Volume: 50.000 µl

Acq. Method    : C:\CHEM32\1\DATA\DEMO\CYCLISATION TIME COURSES 2015-12-09 08-41-41\10 TO
                100 OV 15MIN 50UL.M
Last changed   : 12/9/2015 8:34:52 AM by Simi120102015
Analysis Method: D:\2014\CHRIS HPLC DATA\DATA\CYCLISATION TIME COURSES 2015-12-09 08-41-41
                \10 TO 100 OV 15MIN 50UL.M (Sequence Method)
Last changed   : 12/9/2015 8:34:52 AM by Simi120102015
=====
    
```

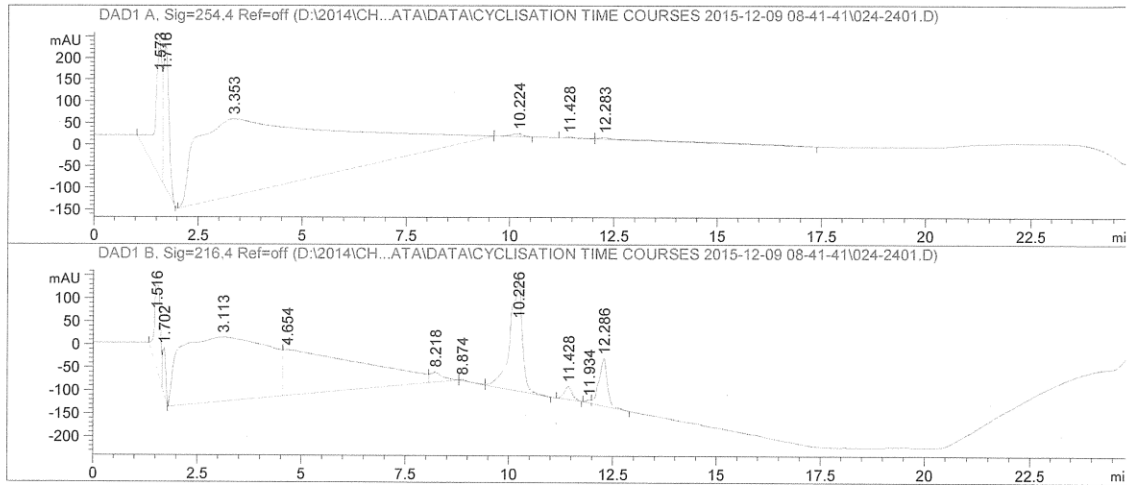

=====  
Area Percent Report  
=====

```

Sorted By      :      Signal
Multiplier     :      1.0000
Dilution       :      1.0000
Use Multiplier & Dilution Factor with ISTDs
    
```

Signal 1: DAD1 A, Sig=254,4 Ref=off

| Peak # | RetTime [min] | Type | Width [min] | Area [mAU*s] | Height [mAU] | Area %  |
|--------|---------------|------|-------------|--------------|--------------|---------|
| 1      | 1.573         | BV   | 0.1631      | 3866.66553   | 315.27979    | 7.9711  |
| 2      | 1.716         | VB   | 0.1345      | 2936.91284   | 328.01505    | 6.0544  |
| 3      | 3.353         | BB   | 2.8744      | 4.10430e4    | 176.79466    | 84.6097 |
| 4      | 10.224        | BB   | 0.2467      | 117.43279    | 6.26312      | 0.2421  |
| 5      | 11.428        | BV   | 0.3077      | 56.32907     | 2.43674      | 0.1161  |
| 6      | 12.283        | VB   | 1.3310      | 488.26379    | 4.40569      | 1.0066  |

Totals :                                    4.85086e4    833.19503

Data File D:\2014\CH...C DATA\DATA\CYCLISATION TIME COURSES 2015-12-09 08-41-41\025-2501.D  
 Sample Name: Pro S epi AIP I PS CD T=4

```

=====
Acq. Operator   : Simi120102015           Seq. Line : 25
Acq. Instrument : LC1260                  Location  : Vial 25
Injection Date  : 12/9/2015 7:15:55 PM    Inj       : 1
                                           Inj Volume: 50.000 µl

Acq. Method     : C:\CHEM32\1\DATA\DEMO\CYCLISATION TIME COURSES 2015-12-09 08-41-41\10 TO
100 OV 15MIN 50UL.M
Last changed    : 12/9/2015 8:34:52 AM by Simi120102015
Analysis Method : D:\2014\CHRIS HPLC DATA\DATA\CYCLISATION TIME COURSES 2015-12-09 08-41-41
\10 TO 100 OV 15MIN 50UL.M (Sequence Method)
Last changed    : 12/9/2015 8:34:52 AM by Simi120102015
=====
  
```

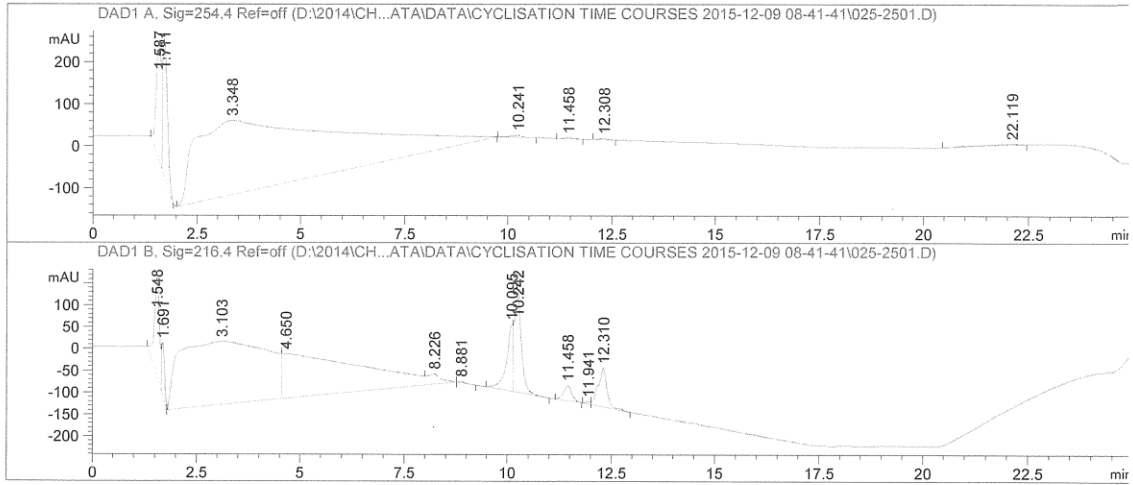

=====  
 Area Percent Report  
 =====

```

Sorted By      :      Signal
Multiplier     :      1.0000
Dilution       :      1.0000
Use Multiplier & Dilution Factor with ISTDs
  
```

Signal 1: DAD1 A, Sig=254,4 Ref=off

| Peak # | RetTime [min] | Type | Width [min] | Area [mAU*s] | Height [mAU] | Area %  |
|--------|---------------|------|-------------|--------------|--------------|---------|
| 1      | 1.587         | BV   | 0.1370      | 2517.76270   | 290.86017    | 5.3746  |
| 2      | 1.711         | VB   | 0.1231      | 2619.98633   | 328.32071    | 5.5928  |
| 3      | 3.348         | BB   | 2.8989      | 4.13049e4    | 176.33109    | 88.1717 |
| 4      | 10.241        | BB   | 0.2320      | 101.90182    | 5.88484      | 0.2175  |
| 5      | 11.458        | BB   | 0.2007      | 37.15019     | 2.69713      | 0.0793  |
| 6      | 12.308        | BB   | 0.1748      | 37.44059     | 2.97651      | 0.0799  |
| 7      | 22.119        | BB   | 1.1297      | 226.86057    | 2.48345      | 0.4843  |

Totals :                                    4.68460e4    809.55389

Sample Name: Pro S epi AIP I PS CD T=5

```

=====
Acq. Operator   : Simi120102015           Seq. Line : 26
Acq. Instrument : LC1260                  Location  : Vial 26
Injection Date  : 12/9/2015 7:42:17 PM    Inj       : 1
                                           Inj Volume: 50.000 µl

Acq. Method     : C:\CHEM32\1\DATA\DEMO\CYCLISATION TIME COURSES 2015-12-09 08-41-41\10 TO
                  100 OV 15MIN 50UL.M

Last changed    : 12/9/2015 8:34:52 AM by Simi120102015
Analysis Method : D:\2014\CHRIS HPLC DATA\DATA\CYCLISATION TIME COURSES 2015-12-09 08-41-41
                  \10 TO 100 OV 15MIN 50UL.M (Sequence Method)

Last changed    : 12/9/2015 8:34:52 AM by Simi120102015
=====
    
```

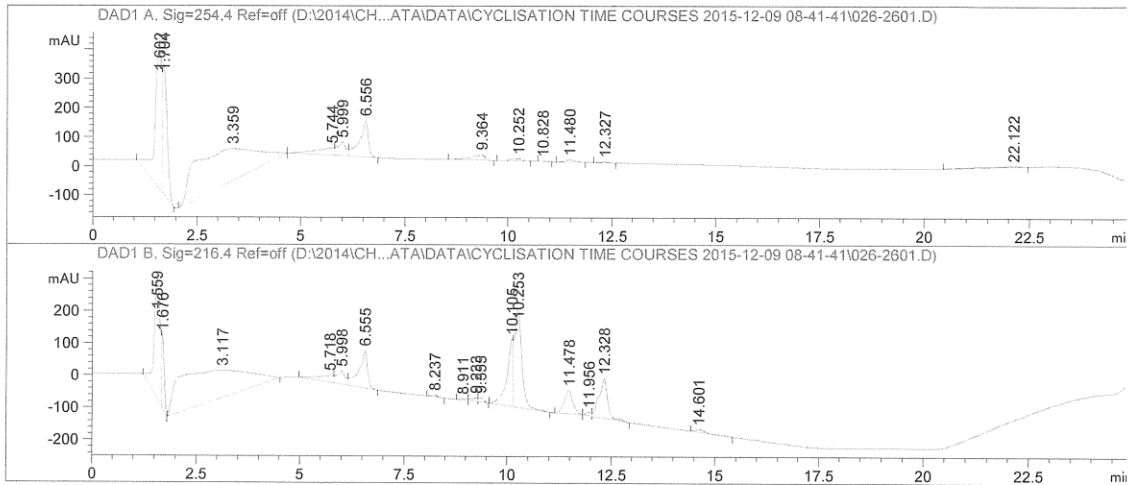

=====  
 Area Percent Report  
 =====

```

Sorted By      : Signal
Multiplier     : 1.0000
Dilution       : 1.0000
Use Multiplier & Dilution Factor with ISTDs
    
```

Signal 1: DAD1 A, Sig=254,4 Ref=off

| Peak # | RetTime [min] | Type | Width [min] | Area [mAU*s] | Height [mAU] | Area %  |
|--------|---------------|------|-------------|--------------|--------------|---------|
| 1      | 1.602         | BV   | 0.1680      | 5580.91895   | 508.85904    | 21.9606 |
| 2      | 1.704         | VB   | 0.1156      | 3330.00220   | 443.56009    | 13.1034 |
| 3      | 3.359         | BB   | 1.4560      | 1.22159e4    | 109.29186    | 48.0690 |
| 4      | 5.744         | BV   | 0.3984      | 766.57751    | 25.52615     | 3.0164  |
| 5      | 5.999         | VV   | 0.1941      | 690.55743    | 47.92941     | 2.7173  |
| 6      | 6.556         | VB   | 0.1979      | 1854.15955   | 127.28959    | 7.2960  |
| 7      | 9.364         | BB   | 0.2931      | 421.56686    | 18.69113     | 1.6588  |
| 8      | 10.252        | BB   | 0.2312      | 139.49071    | 8.08670      | 0.5489  |
| 9      | 10.828        | BB   | 0.1420      | 9.70850      | 1.02928      | 0.0382  |
| 10     | 11.480        | BB   | 0.2287      | 122.68991    | 7.35035      | 0.4828  |



Data File D:\2014\CH...C DATA\DATA\CYCLISATION TIME COURSES 2015-12-09 08-41-41\027-2701.D  
 Sample Name: Pro S epi AIP I PS CD T=6

```

=====
Acq. Operator   : Simi120102015           Seq. Line : 27
Acq. Instrument : LC1260                 Location  : Vial 27
Injection Date  : 12/9/2015 8:08:39 PM   Inj       : 1
                                           Inj Volume: 50.000 µl
Acq. Method     : C:\CHEM32\1\DATA\DEMO\CYCLISATION TIME COURSES 2015-12-09 08-41-41\10 TO
                : 100 OV 15MIN 50UL.M
Last changed    : 12/9/2015 8:34:52 AM by Simi120102015
Analysis Method : D:\2014\CHRIS HPLC DATA\DATA\CYCLISATION TIME COURSES 2015-12-09 08-41-41
                : \10 TO 100 OV 15MIN 50UL.M (Sequence Method)
Last changed    : 12/9/2015 8:34:52 AM by Simi120102015
=====
  
```

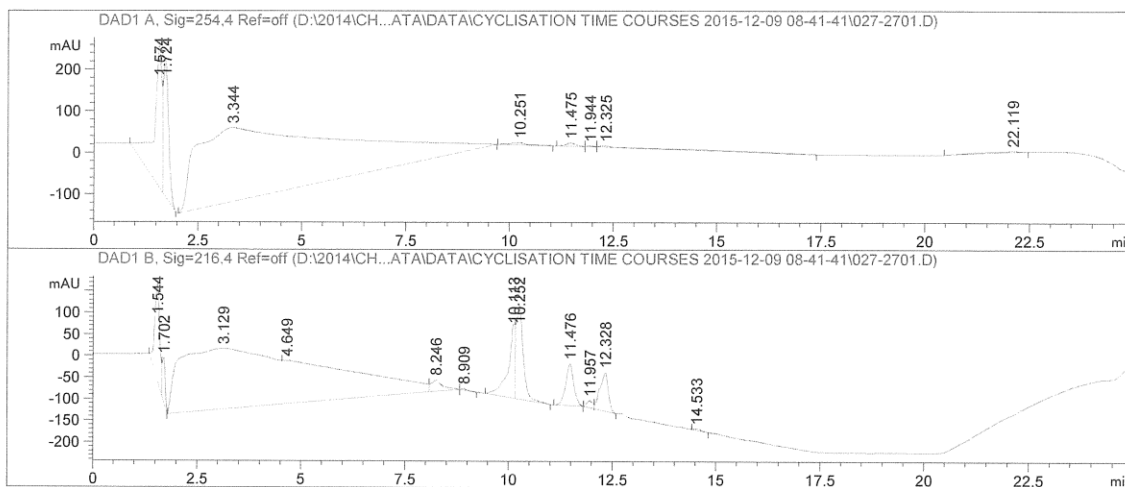

=====  
 Area Percent Report  
 =====

```

Sorted By      : Signal
Multiplier     : 1.0000
Dilution       : 1.0000
Use Multiplier & Dilution Factor with ISTDs
  
```

Signal 1: DAD1 A, Sig=254,4 Ref=off

| Peak # | RetTime [min] | Type | Width [min] | Area [mAU*s] | Height [mAU] | Area %  |
|--------|---------------|------|-------------|--------------|--------------|---------|
| 1      | 1.574         | BV   | 0.1851      | 4707.99365   | 340.84787    | 9.4353  |
| 2      | 1.724         | VB   | 0.1276      | 2849.03564   | 333.68732    | 5.7097  |
| 3      | 3.344         | BB   | 2.8834      | 4.13704e4    | 177.22363    | 82.9101 |
| 4      | 10.251        | BB   | 0.2719      | 118.68468    | 5.67604      | 0.2379  |
| 5      | 11.475        | BV   | 0.2220      | 123.13974    | 7.89394      | 0.2468  |
| 6      | 11.944        | VV   | 0.1930      | 29.98242     | 2.22746      | 0.0601  |
| 7      | 12.325        | VB   | 1.3417      | 460.10406    | 4.08597      | 0.9221  |
| 8      | 22.119        | BB   | 1.1310      | 238.57440    | 2.63836      | 0.4781  |

Totals : 4.98979e4 874.28059

Data File D:\2014\CH...C DATA\DATA\CYCLISATION TIME COURSES 2015-12-09 08-41-41\028-2801.D  
 Sample Name: Pro S epi AIP I PS CD T=7

```

=====
Acq. Operator   : Simi120102015           Seq. Line : 28
Acq. Instrument : LC1260                 Location  : Vial 28
Injection Date  : 12/9/2015 8:35:02 PM   Inj       : 1
                                           Inj Volume: 50.000 µl

Acq. Method     : C:\CHEM32\1\DATA\DEMO\CYCLISATION TIME COURSES 2015-12-09 08-41-41\10 TO
                  100 OV 15MIN 50UL.M

Last changed    : 12/9/2015 8:34:52 AM by Simi120102015
Analysis Method : D:\2014\CHRIS HPLC DATA\DATA\CYCLISATION TIME COURSES 2015-12-09 08-41-41
                  \10 TO 100 OV 15MIN 50UL.M (Sequence Method)

Last changed    : 12/9/2015 8:34:52 AM by Simi120102015
=====
  
```

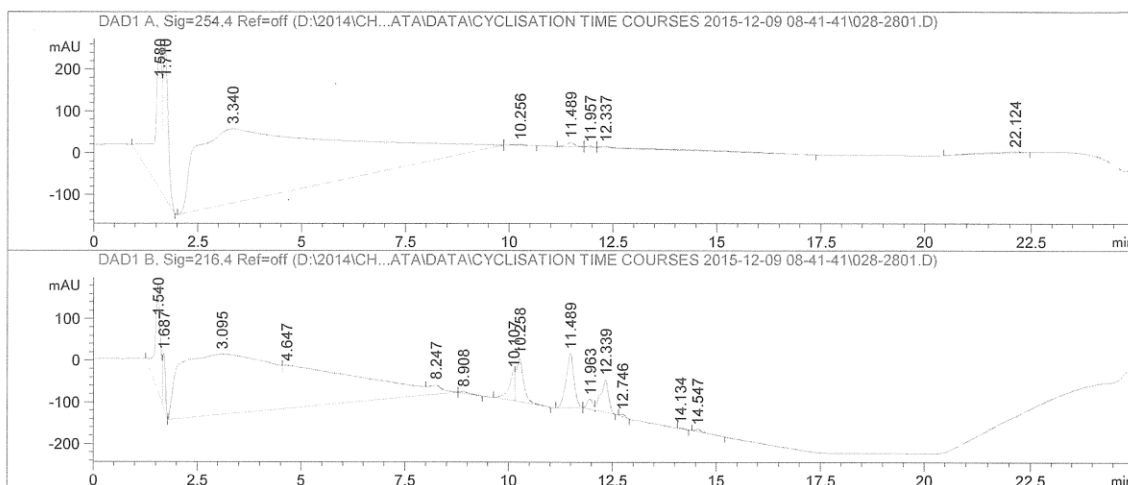

=====  
 Area Percent Report  
 =====

```

Sorted By      :      Signal
Multiplier     :      1.0000
Dilution       :      1.0000
Use Multiplier & Dilution Factor with ISTDs
  
```

Signal 1: DAD1 A, Sig=254,4 Ref=off

| Peak # | RetTime [min] | Type | Width [min] | Area [mAU*s] | Height [mAU] | Area %  |
|--------|---------------|------|-------------|--------------|--------------|---------|
| 1      | 1.580         | BV   | 0.1941      | 4443.66699   | 332.10226    | 8.8077  |
| 2      | 1.710         | VB   | 0.1245      | 2983.06885   | 360.52243    | 5.9127  |
| 3      | 3.340         | BB   | 2.9327      | 4.20051e4    | 177.00153    | 83.2577 |
| 4      | 10.256        | BB   | 0.2146      | 41.02726     | 2.56509      | 0.0813  |
| 5      | 11.489        | BV   | 0.2192      | 159.67226    | 10.51505     | 0.3165  |
| 6      | 11.957        | VV   | 0.1934      | 46.38908     | 3.43854      | 0.0919  |
| 7      | 12.337        | VB   | 1.5655      | 535.06836    | 4.06021      | 1.0606  |
| 8      | 22.124        | BB   | 1.1321      | 237.91399    | 2.64833      | 0.4716  |

Totals :                                    5.04519e4    892.85345

Sample Name: Pro S epi AIP I PS CD T=8

```

=====
Acq. Operator   : Simi120102015           Seq. Line : 29
Acq. Instrument : LC1260                  Location  : Vial 29
Injection Date  : 12/9/2015 9:01:23 PM    Inj       : 1
                                           Inj Volume: 50.000 µl

Acq. Method     : C:\CHEM32\1\DATA\DEMO\CYCLISATION TIME COURSES 2015-12-09 08-41-41\10 TO
100 OV 15MIN 50UL.M
Last changed    : 12/9/2015 8:34:52 AM by Simi120102015
Analysis Method : D:\2014\CHRIS HPLC DATA\DATA\CYCLISATION TIME COURSES 2015-12-09 08-41-41
\10 TO 100 OV 15MIN 50UL.M (Sequence Method)
Last changed    : 12/9/2015 8:34:52 AM by Simi120102015
=====
    
```

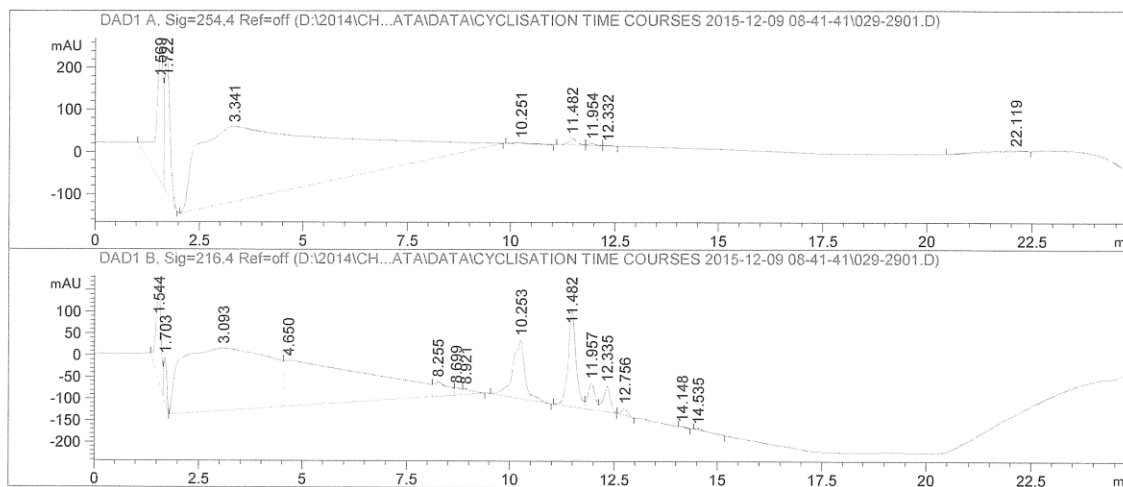

=====  
Area Percent Report  
=====

```

Sorted By      :      Signal
Multiplier     :      1.0000
Dilution       :      1.0000
Use Multiplier & Dilution Factor with ISTDs
    
```

Signal 1: DAD1 A, Sig=254,4 Ref=off

| Peak # | RetTime [min] | Type | Width [min] | Area [mAU*s] | Height [mAU] | Area %  |
|--------|---------------|------|-------------|--------------|--------------|---------|
| 1      | 1.569         | BV   | 0.1660      | 3945.06543   | 324.15161    | 8.0010  |
| 2      | 1.722         | VB   | 0.1244      | 2753.34375   | 326.33218    | 5.5841  |
| 3      | 3.341         | BB   | 2.9324      | 4.19959e4    | 177.36577    | 85.1726 |
| 4      | 10.251        | BB   | 0.2612      | 67.30489     | 3.36711      | 0.1365  |
| 5      | 11.482        | BV   | 0.1974      | 223.53157    | 16.35609     | 0.4533  |
| 6      | 11.954        | VV   | 0.1812      | 62.37595     | 5.01051      | 0.1265  |
| 7      | 12.332        | VB   | 0.1537      | 21.76268     | 2.08670      | 0.0441  |
| 8      | 22.119        | BB   | 1.1242      | 237.54454    | 2.64390      | 0.4818  |

Totals :                                    4.93069e4    857.31387

Data File D:\2014\CH...C DATA\DATA\CYCLISATION TIME COURSES 2015-12-09 08-41-41\030-3001.D  
 Sample Name: Pro S epi AIP I PS CD 2 days

```
=====
Acq. Operator   : Simi120102015          Seq. Line : 30
Acq. Instrument : LC1260                 Location  : Vial 30
Injection Date  : 12/9/2015 9:27:46 PM   Inj       : 1
                                           Inj Volume: 50.000 µl

Acq. Method     : C:\CHEM32\1\DATA\DEMO\CYCLISATION TIME COURSES 2015-12-09 08-41-41\10 TO
                  100 OV 15MIN 50UL.M

Last changed    : 12/9/2015 8:34:52 AM by Simi120102015
Analysis Method : D:\2014\CHRIS HPLC DATA\DATA\CYCLISATION TIME COURSES 2015-12-09 08-41-41
                  \10 TO 100 OV 15MIN 50UL.M (Sequence Method)

Last changed    : 12/9/2015 8:34:52 AM by Simi120102015
=====
```

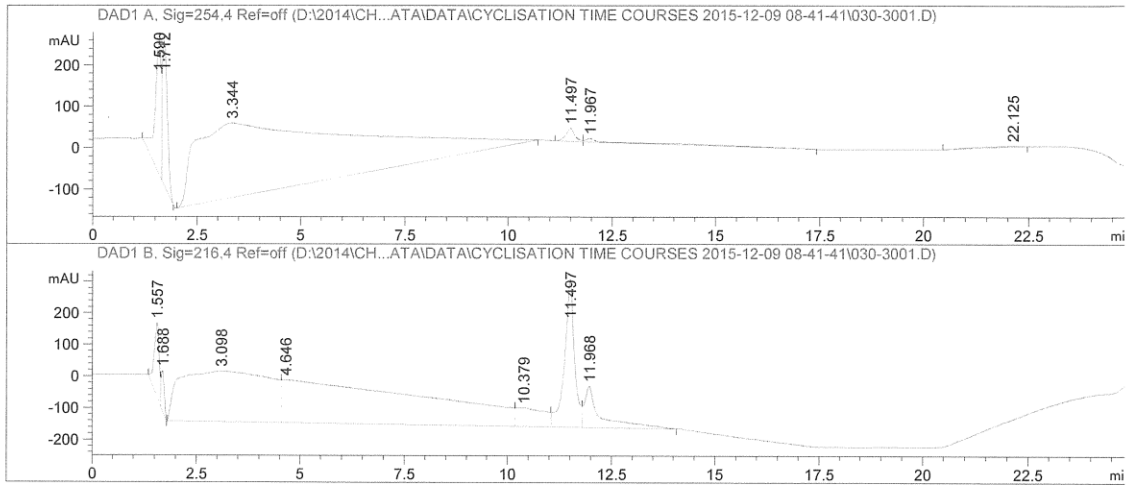

=====  
 Area Percent Report  
 =====

```
Sorted By      : Signal
Multiplier     : 1.0000
Dilution       : 1.0000
Use Multiplier & Dilution Factor with ISTDs
```

Signal 1: DAD1 A, Sig=254,4 Ref=off

| Peak # | RetTime [min] | Type | Width [min] | Area [mAU*s] | Height [mAU] | Area %  |
|--------|---------------|------|-------------|--------------|--------------|---------|
| 1      | 1.590         | BV   | 0.1557      | 3266.97339   | 323.89368    | 6.0611  |
| 2      | 1.712         | VB   | 0.1223      | 2821.94189   | 348.96078    | 5.2354  |
| 3      | 3.344         | BB   | 3.1929      | 4.65812e4    | 179.53839    | 86.4203 |
| 4      | 11.497        | BV   | 0.2117      | 458.28003    | 31.50893     | 0.8502  |
| 5      | 11.967        | VB   | 0.7869      | 533.45526    | 8.33246      | 0.9897  |
| 6      | 22.125        | BB   | 1.1335      | 238.91240    | 2.66091      | 0.4432  |

Totals :                    5.39007e4   894.89515

Data File C:\CHEM32\1\DATA\S\_EPI AIPI WITH HOAT 2016-04-05 14-13-10\041-0101.D  
Sample Name: S epi AIP I cyclised with HOAt t = 0

```
=====
Acq. Operator   : SYSTEM                               Seq. Line :    1
Acq. Instrument : LC1260                               Location  : Vial 41
Injection Date  : 4/5/2016 2:14:35 PM                 Inj       :    1
                                                    Inj Volume: 20.000 µl

Acq. Method     : C:\CHEM32\1\DATA\S_EPI AIPI WITH HOAT 2016-04-05 14-13-10\10 TO 100 OVER 15
                  MINS 20UL.M
Last changed    : 4/5/2016 2:13:10 PM by SYSTEM
Analysis Method : C:\CHEM32\1\DATA\S_EPI AIPI WITH HOAT 2016-04-05 14-13-10\10 TO 100 OVER 15
                  MINS 20UL.M (Sequence Method)
Last changed    : 4/5/2016 4:09:36 PM by SYSTEM
                  (modified after loading)
=====
```

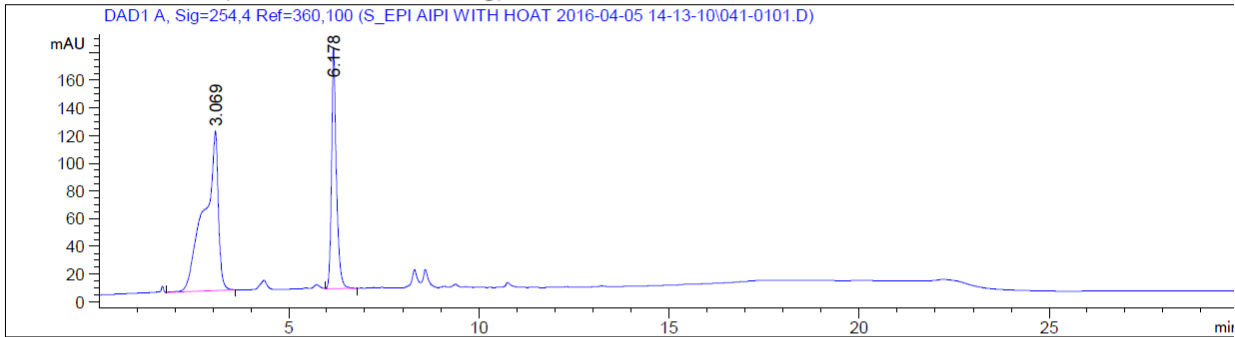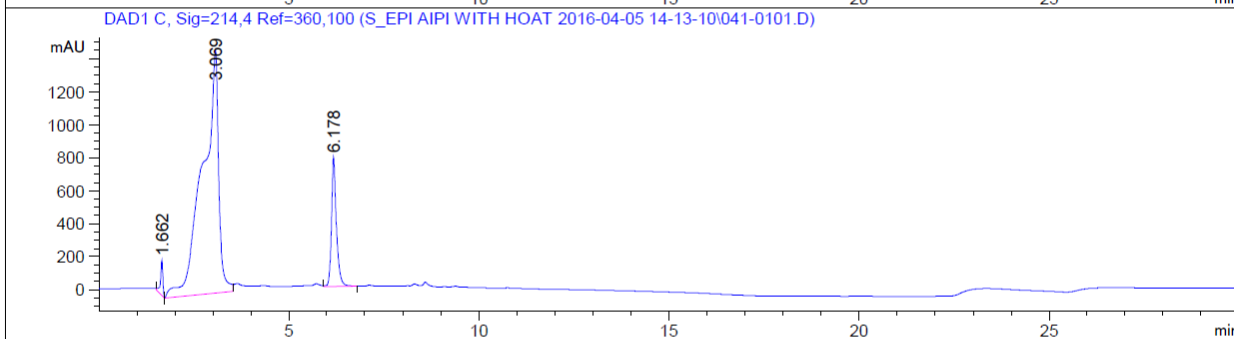

=====  
Fraction Information  
=====

No Fractions found.  
=====

=====  
Area Percent Report  
=====

```
Sorted By      :      Signal
Multiplier     :      1.0000
Dilution       :      1.0000
Use Multiplier & Dilution Factor with ISTDs
```

Data File C:\CHEM32\1\DATA\S\_EPI AIPI WITH HOAT 2016-04-05 14-13-10\043-0301.D  
Sample Name: S epi AIP I cyclised with HOAT t = 2

=====

|                                                                                                                                |                        |
|--------------------------------------------------------------------------------------------------------------------------------|------------------------|
| Acq. Operator : SYSTEM                                                                                                         | Seq. Line : 3          |
| Acq. Instrument : LC1260                                                                                                       | Location : Vial 43     |
| Injection Date : 4/5/2016 3:17:39 PM                                                                                           | Inj : 1                |
|                                                                                                                                | Inj Volume : 20.000 µl |
| Acq. Method : C:\CHEM32\1\DATA\S_EPI AIPI WITH HOAT 2016-04-05 14-13-10\10 TO 100 OVER 15<br>MINS 20UL.M                       |                        |
| Last changed : 4/5/2016 2:13:10 PM by SYSTEM                                                                                   |                        |
| Analysis Method : C:\CHEM32\1\DATA\S_EPI AIPI WITH HOAT 2016-04-05 14-13-10\10 TO 100 OVER 15<br>MINS 20UL.M (Sequence Method) |                        |
| Last changed : 4/5/2016 4:09:36 PM by SYSTEM                                                                                   |                        |

(modified after loading) (Current integration events modified)

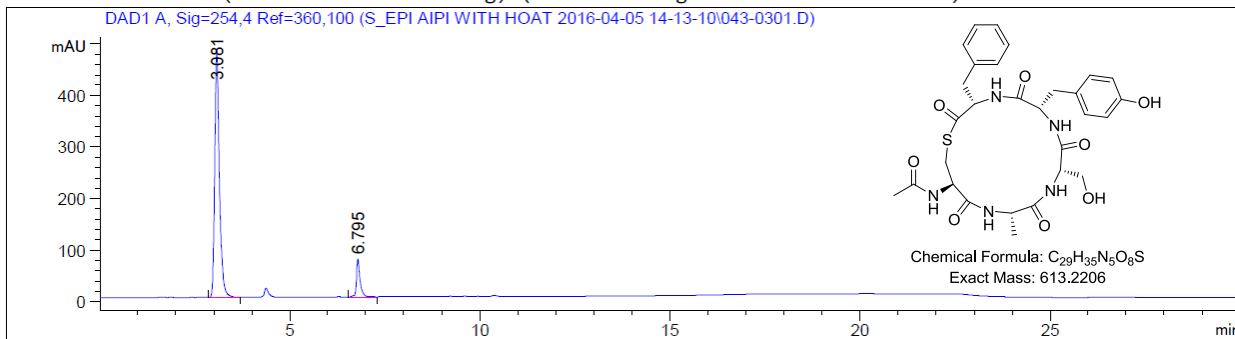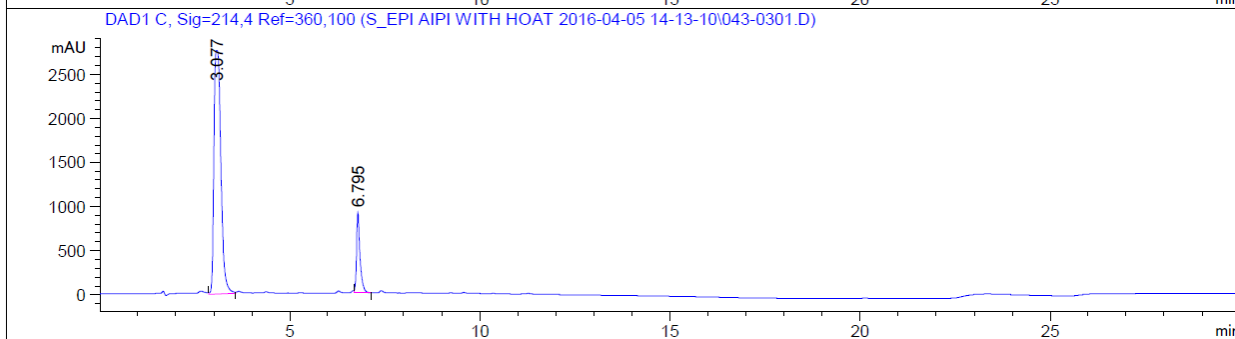

=====  
Fraction Information  
=====

No Fractions found.  
=====

=====  
Area Percent Report  
=====

Sorted By : Signal  
Multiplier : 1.0000  
Dilution : 1.0000  
Use Multiplier & Dilution Factor with ISTDs

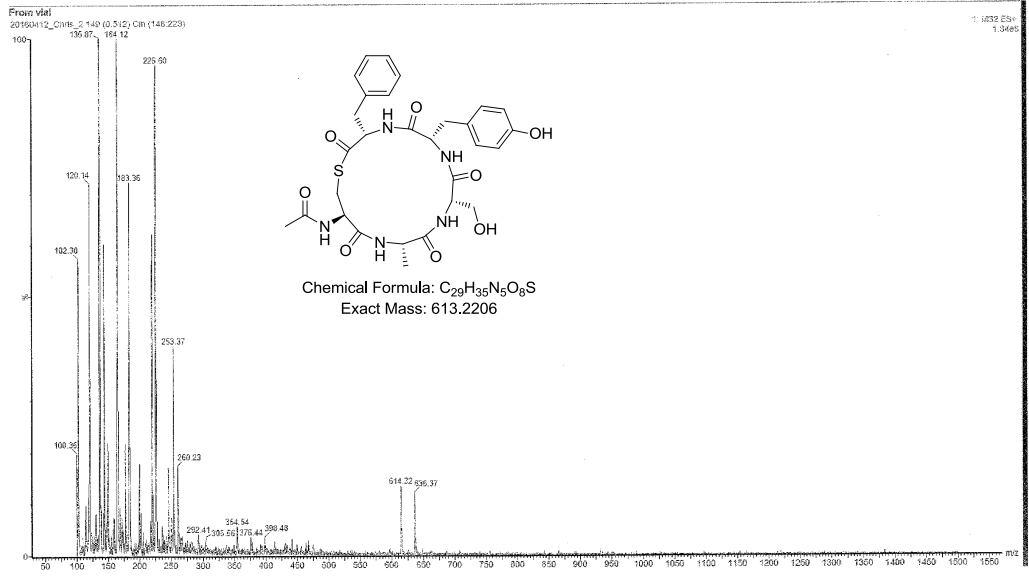

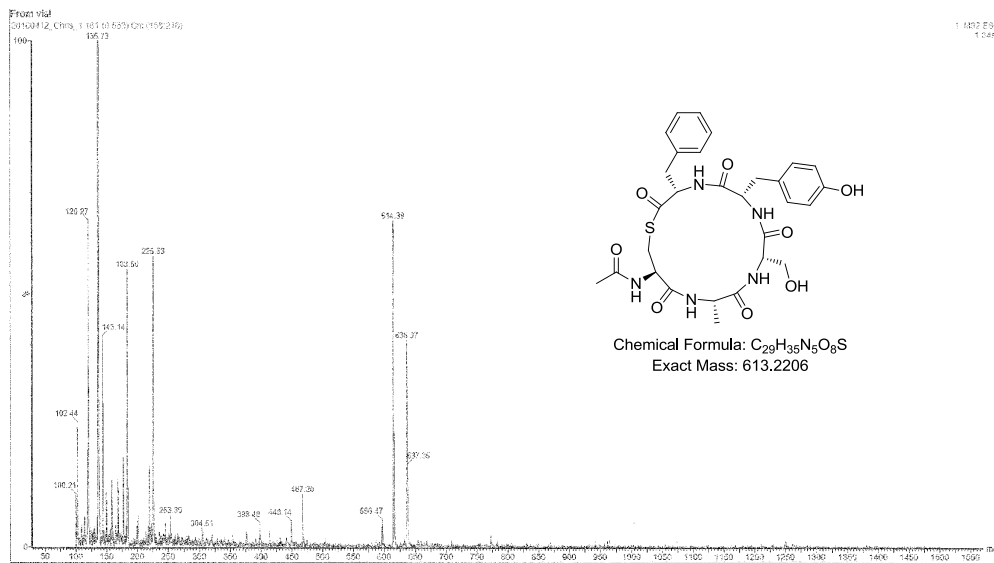



## References

1. M. E. Olson, D. A. Todd, C. R. Schaeffer, A. E. Paharik, M. J. Van Dyke, H. Buettner, P. M. Dunman, H. Rohde, N. B. Cech, P. D. Fey and A. R. Horswill, *J. Bacteriol.*, 2014, **196**, 3482-3493, 3413 pp.
2. S. Heilbronner, M. T. G. Holden, A. van Tonder, J. A. Geoghegan, T. J. Foster, J. Parkhill and S. D. Bentley, *FEMS Microbiol. Lett.*, 2011, **322**, 60-67.
3. S. Heilbronner, F. Hanses, I. R. Monk, P. Speziale and T. J. Foster, *Microbiology*, 2013, **159**, 2141-2152.
